# Supplementary material for: Loss of Gst1 enhances resistance to MMS by reprogramming the transcription of DNA damage response genes in a Rad53-dependent manner in Candida albicans
Source: Springer Nature journal article supplement (doi:10.1186/s12964-024-01865-7), 2024-10-14
Supplement: MOESM3 [file 12964_2024_1865_MOESM3_ESM.xlsx]

## Sheet: 12964_2024_1865_MOESM3_ESM
id	Log2 Fold	PValue	FDR	Symbol
ncbi_3642909	-11.0233	1.74E-173	1.06E-169	gst1
MSTRG.6294	-10.6101	0.00027808	0.00222244	--
ncbi_3639173	-10.403	0.00429783	0.0197844	--
ncbi_3634876	-9.83526	0.0042558	0.0196207	--
ncbi_3642639	-3.80802	2.51E-09	1.46E-07	CFL1
ncbi_3646814	-3.42294	4.23E-07	1.17E-05	ECE1
ncbi_3645372	-3.4157	4.94E-08	1.85E-06	HWP1
ncbi_3640150	-3.39426	2.15E-44	4.33E-41	isp4
ncbi_3641811	-3.25546	1.17E-24	6.42E-22	CFL1
gene-CAALFM_C201960CA	-3.21953	4.23E-06	7.58E-05	-
ncbi_30515347	-2.79225	8.02E-31	9.72E-28	DEHA2E01232g
ncbi_3638919	-2.69989	1.13E-05	0.00016251	PGA12
ncbi_3645009	-2.6436	1.85E-30	1.87E-27	PGA10
ncbi_3635741	-2.50362	1.92E-06	3.97E-05	IME4
ncbi_3644483	-2.4332	0.00021891	0.00183424	PHO2
ncbi_3637784	-2.43143	1.63E-23	8.24E-21	MNN1
ncbi_30515276	-2.37652	0.00743563	0.0304153	--
ncbi_3643909	-2.26586	5.23E-26	3.52E-23	PST2
ncbi_3647152	-2.18046	7.40E-15	1.40E-12	FET3
ncbi_3645006	-2.17572	2.52E-05	0.000310962	PGA7
ncbi_3635197	-2.1712	2.29E-10	2.01E-08	SAP3
ncbi_3646723	-2.17032	3.99E-29	3.45E-26	TSSK2
ncbi_3648090	-2.099	0.00239057	0.0124524	OXR1
ncbi_3642994	-2.06117	5.03E-21	1.90E-18	AMO
ncbi_3646620	-2.00105	1.01E-05	0.000151904	--
gene-CAALFM_CR01860WA	-1.96115	0.000507615	0.00360508	-
ncbi_3643662	-1.91828	8.85E-13	1.37E-10	GAP2
ncbi_3642627	-1.89268	4.30E-18	1.30E-15	--
ncbi_3645348	-1.87282	4.80E-25	2.91E-22	PHO84
ncbi_3636637	-1.86945	0.00678713	0.028415	--
ncbi_3648086	-1.8291	7.88E-36	1.19E-32	GDHA
ncbi_3641539	-1.82887	0.01192	0.0437911	--
MSTRG.2394	-1.81056	3.95E-07	1.11E-05	--
ncbi_3645007	-1.80683	2.76E-14	5.07E-12	RBT5
ncbi_3634945	-1.7616	0.000140876	0.00127378	AOX2
ncbi_3642649	-1.66201	0.00240776	0.0125253	--
ncbi_3646562	-1.61569	6.27E-06	0.000104681	GIT1
ncbi_3642253	-1.59617	0.0107257	0.0403831	--
ncbi_3638460	-1.59081	3.26E-26	2.47E-23	YDR090C
ncbi_3645342	-1.57029	0.00268688	0.0135643	--
ncbi_3640580	-1.56789	0.000541317	0.00377799	IFF11
ncbi_3647697	-1.56707	6.28E-16	1.52E-13	OPT2
ncbi_3640990	-1.5346	3.15E-05	0.000372727	NDT80
ncbi_3640943	-1.52837	2.90E-11	3.14E-09	--
ncbi_3638888	-1.52805	6.06E-06	0.000102292	SOD4
ncbi_3645002	-1.51756	2.11E-12	2.97E-10	RCH1
ncbi_3643014	-1.49431	0.0066329	0.0279625	MET1
ncbi_3638401	-1.4934	4.37E-07	1.20E-05	DAL5
ncbi_3646929	-1.49214	1.91E-08	8.69E-07	EFH1
ncbi_3635185	-1.48489	0.0017319	0.00969127	--
MSTRG.7563	-1.46183	3.14E-15	6.34E-13	--
ncbi_3639299	-1.43342	4.25E-10	3.34E-08	TY3B-G
ncbi_3637706	-1.42485	2.49E-07	7.48E-06	--
ncbi_3637993	-1.39503	2.84E-21	1.15E-18	FRE7
ncbi_3647453	-1.38376	6.22E-12	7.69E-10	AIM18
ncbi_3645891	-1.37487	0.000959968	0.00608952	--
ncbi_3646158	-1.3722	1.85E-05	0.000242661	STUB1
ncbi_3647077	-1.34041	1.26E-21	5.47E-19	CTR1
ncbi_3646025	-1.32935	1.01E-15	2.19E-13	CFL1
MSTRG.3156	-1.32898	0.00260157	0.0132218	--
ncbi_3641146	-1.32331	1.59E-05	0.000214375	IMG2
ncbi_3636194	-1.30061	2.66E-17	7.32E-15	GCV3
ncbi_3647986	-1.29813	2.04E-12	2.94E-10	YIR035C
ncbi_3636838	-1.29769	2.45E-08	1.06E-06	HOL1
ncbi_3636529	-1.26835	1.08E-10	1.04E-08	DES1
ncbi_3638967	-1.26785	1.21E-09	8.16E-08	CHT3
ncbi_3637952	-1.26531	5.57E-08	2.06E-06	YOX1
ncbi_3642945	-1.25481	5.52E-10	4.18E-08	TVP15
ncbi_3643012	-1.25217	7.73E-10	5.59E-08	BNA3
ncbi_3638791	-1.2098	1.41E-18	4.76E-16	CHA1
ncbi_3641732	-1.20838	2.12E-06	4.31E-05	--
ncbi_3644939	-1.20671	0.000704873	0.00472881	PGA22
ncbi_3645969	-1.193	0.010931	0.0409175	NAG3
ncbi_3643317	-1.17776	7.75E-10	5.59E-08	RBE1
ncbi_3638013	-1.1687	2.29E-10	2.01E-08	ADK2
ncbi_3647875	-1.15733	7.70E-08	2.68E-06	--
ncbi_3636566	-1.15582	1.93E-11	2.16E-09	TOS1
ncbi_3636428	-1.15411	1.60E-08	7.43E-07	ILV3
ncbi_3638009	-1.14657	6.25E-11	6.41E-09	CSA1
ncbi_3636406	-1.14581	5.29E-10	4.06E-08	PGA4
ncbi_3642271	-1.14568	3.44E-06	6.47E-05	HNT2
ncbi_3635742	-1.14518	4.69E-12	6.32E-10	mpo1
ncbi_3637929	-1.14389	1.05E-07	3.41E-06	PGA54
ncbi_3638036	-1.14214	1.74E-08	8.06E-07	PET8
ncbi_3646024	-1.13857	4.98E-12	6.56E-10	CFL1
ncbi_3648051	-1.13673	2.33E-11	2.57E-09	--
ncbi_3635595	-1.12851	4.04E-06	7.32E-05	AIM2
ncbi_3643438	-1.12763	7.91E-13	1.26E-10	CDC19
ncbi_3640564	-1.12612	4.61E-08	1.76E-06	DAL1
ncbi_3636523	-1.12301	5.04E-16	1.27E-13	CHT2
ncbi_3642775	-1.12267	1.73E-11	2.02E-09	SDH1
ncbi_3648225	-1.1205	1.31E-05	0.000183856	--
ncbi_3643664	-1.11286	0.00179635	0.00993436	ADY2
ncbi_3648065	-1.10852	4.50E-08	1.73E-06	calJ
ncbi_3638394	-1.104	1.68E-10	1.54E-08	PGA18
ncbi_3638499	-1.09867	0.0127949	0.0463309	TRY6
ncbi_3637004	-1.09737	5.20E-12	6.71E-10	SUR7
ncbi_3643141	-1.08773	9.49E-09	4.75E-07	AIM17
ncbi_3637918	-1.08243	3.00E-06	5.77E-05	adv-1
ncbi_3638400	-1.07074	1.76E-12	2.61E-10	SNG1
ncbi_3643316	-1.0692	6.35E-11	6.41E-09	FMP41
ncbi_3641024	-1.06833	4.80E-15	9.38E-13	ADE17
ncbi_3648053	-1.06794	3.27E-08	1.31E-06	VMA6
MSTRG.5578	-1.063	0.00858404	0.0339661	--
ncbi_3642963	-1.05741	1.22E-06	2.84E-05	BOT1
ncbi_3635152	-1.05576	2.48E-10	2.12E-08	STP3
ncbi_3642962	-1.0504	1.87E-11	2.13E-09	YDC1
ncbi_3634783	-1.04745	1.33E-05	0.000185896	--
ncbi_3641113	-1.04464	9.15E-11	8.94E-09	RTN1
ncbi_3640589	-1.03569	6.48E-07	1.68E-05	VTC1
ncbi_3647910	-1.03273	9.60E-08	3.20E-06	--
ncbi_3642277	-1.02906	1.51E-09	9.65E-08	OPI3
ncbi_3638963	-1.02023	1.96E-09	1.20E-07	ATP16
ncbi_3646505	-1.01193	1.37E-16	3.62E-14	GCV2
ncbi_3638023	-1.00299	3.15E-08	1.29E-06	RPP0
ncbi_3636452	-1.00222	3.75E-10	2.99E-08	SAH1
ncbi_3639231	1.00005	0.014066	0.0497442	HEK2
ncbi_3640525	1.00521	0.0137972	0.0489652	RPT2
ncbi_3644060	1.00664	0.00844171	0.0335343	EBP1
ncbi_3636824	1.00891	0.011417	0.0423542	FRS2
ncbi_3645425	1.01153	0.0122232	0.0446611	YER156C
ncbi_3636850	1.012	0.0100041	0.0383575	RPL10
ncbi_3644560	1.01998	0.0127279	0.0461435	MRPS18
ncbi_3644580	1.02369	0.010629	0.0401186	SKS1
ncbi_3648356	1.02981	0.0139803	0.0494988	NAS2
ncbi_3639200	1.03355	0.00493871	0.0221949	GLC3
ncbi_3642062	1.03754	0.00793422	0.0319585	RIB3
ncbi_3638350	1.03822	0.00981824	0.0377644	CCP1
ncbi_3640302	1.04074	0.0128664	0.0464509	CDC50
ncbi_3647181	1.04281	0.00653303	0.0275991	GLY1
ncbi_3636836	1.04392	0.00651392	0.0275376	GOR1
ncbi_3647990	1.04394	0.00603088	0.0259851	APE2
ncbi_3639899	1.04515	0.0124286	0.0452751	YDR415C
ncbi_3645339	1.04725	0.0103817	0.0393817	GAD1
ncbi_3638451	1.04975	0.0110458	0.0412294	--
ncbi_3647612	1.05649	0.00859697	0.0339951	VPS10
ncbi_3639286	1.058	0.0107728	0.0405099	--
ncbi_3637809	1.05814	0.00713795	0.0295973	did2
ncbi_3640429	1.05942	0.011253	0.0418215	UFD4
ncbi_3639192	1.05956	0.0111976	0.0416421	SPBC4B4.01c
ncbi_3645408	1.05994	0.0136879	0.0487772	res2
ncbi_3644416	1.06344	0.00576575	0.0250386	PFK26
ncbi_3641879	1.06513	0.01252	0.0454986	--
ncbi_3644692	1.06661	0.0111962	0.0416421	MNS1
ncbi_3646498	1.06739	0.00889638	0.0347929	--
ncbi_3644786	1.06808	0.00731757	0.0300542	SEC21
ncbi_3639232	1.06903	0.0134004	0.0478936	DIC1
ncbi_3642652	1.07011	0.0126834	0.0460095	TRY3
ncbi_3636884	1.07258	0.00797408	0.0320764	--
MSTRG.6742	1.07306	0.00670694	0.0281766	--
ncbi_3638921	1.07528	0.00821388	0.0328424	AHC1
ncbi_3647678	1.07535	0.00639636	0.0271733	TCB1
ncbi_3640713	1.07589	0.00337292	0.0162297	FUN12
ncbi_3640194	1.07757	0.00330393	0.0159998	cia30
ncbi_3634895	1.0799	0.00750167	0.0305616	DAK
ncbi_3647149	1.08122	0.0114587	0.0424826	uba3
ncbi_3636863	1.08126	0.00511384	0.0227959	YKT6
ncbi_3645429	1.08173	0.00475144	0.0214808	CYS4
ncbi_30514966	1.08376	0.00337731	0.0162379	--
ncbi_3641767	1.08416	0.0117402	0.0433936	CSE1
ncbi_3636229	1.08423	0.00464494	0.0210622	SSA1
ncbi_3639504	1.08699	0.00681477	0.0284913	YNL181W
ncbi_3645129	1.08753	0.0120971	0.0442539	SSU72
ncbi_3639376	1.08934	0.0137026	0.0488008	sed5
ncbi_3647561	1.08938	0.00235041	0.0122854	MCR1
ncbi_3635686	1.0899	0.013512	0.048264	RAT1
ncbi_3647610	1.09072	0.0129934	0.04677	RAX2
ncbi_3647832	1.09115	0.0105984	0.0400529	ALG2
ncbi_3642501	1.09126	0.0030122	0.0148598	UBP2
ncbi_30514999	1.0916	0.00286738	0.0143321	ATG8
ncbi_3647552	1.0916	0.00455451	0.0206892	CHC1
ncbi_3642244	1.09301	0.0067511	0.0283032	CYM1
ncbi_3639362	1.09374	0.00821874	0.0328424	--
ncbi_3641646	1.09382	0.0030377	0.0149613	TIF3
ncbi_3639351	1.09542	0.011818	0.0435748	--
ncbi_3645985	1.09568	0.00384439	0.0181405	TUL1
ncbi_3640264	1.09618	0.0094019	0.0364281	SNF4
ncbi_3638056	1.09969	0.0101785	0.0387808	--
ncbi_3636121	1.1013	0.00526266	0.0232548	SPC3
ncbi_3634824	1.10207	0.0136774	0.0487685	SHY1
ncbi_3646669	1.10389	0.00950982	0.0367414	GPI8
ncbi_3638984	1.10407	0.0118456	0.0435817	UTP14
ncbi_3635164	1.10414	0.0100638	0.038489	UFD2
ncbi_3636184	1.10425	0.00442806	0.0202301	SSK1
ncbi_3640280	1.10441	0.0033404	0.016086	ALS1
ncbi_3635833	1.10504	0.0055563	0.0242857	RAD7
ncbi_3634862	1.1051	0.0111066	0.0413798	PDC2
ncbi_3643676	1.1058	0.00872639	0.0343499	CAALFM_C305360CA
ncbi_3643668	1.10685	0.0131193	0.0471112	AIM23
ncbi_3646666	1.10725	0.00782178	0.0315895	POL12
ncbi_3634912	1.10876	0.00489371	0.022009	PFK26
ncbi_3646713	1.11042	0.00434911	0.0199639	HSM3
ncbi_3644581	1.11057	0.00721095	0.0297692	GAL1
ncbi_3642964	1.11131	0.00682868	0.0285088	MET16
ncbi_3643281	1.1115	0.00752148	0.0306217	YPI2
ncbi_3634807	1.1115	0.00291678	0.0144954	EFR3
ncbi_3646514	1.11198	0.00931965	0.0361681	--
ncbi_3637345	1.11335	0.0110406	0.0412294	--
ncbi_3643343	1.11399	0.00650067	0.0275376	HRQ1
ncbi_3636612	1.11513	0.00575785	0.0250223	NHP10
ncbi_3643754	1.11588	0.00744789	0.0304449	STB4
ncbi_3640416	1.11855	0.00973072	0.0374992	PWP2
ncbi_3639169	1.11882	0.00696171	0.0289413	--
ncbi_3639486	1.11891	0.00554156	0.0242857	SPAC2G11.14
ncbi_3640178	1.11955	0.00664141	0.0279789	sconB
ncbi_3639312	1.12154	0.00256371	0.0130732	GLO1
ncbi_3640196	1.12168	0.0104386	0.039548	ISN1
ncbi_3643222	1.12286	0.0106066	0.040059	AMPP
ncbi_3636922	1.12411	0.00466286	0.0211276	ORC1
ncbi_3634773	1.12438	0.00500472	0.0224084	PAN2
ncbi_3634870	1.12472	0.00266789	0.0134909	--
ncbi_3644530	1.12474	0.00194115	0.0105252	TIM50
ncbi_3639254	1.12519	0.0109352	0.0409175	POL5
ncbi_3647675	1.12676	0.0024697	0.0127657	TBP1
ncbi_3636888	1.12804	0.00179714	0.00993436	RLI1
ncbi_3636910	1.12827	0.00502939	0.0224691	SIP3
ncbi_30514957	1.12827	0.0128347	0.0463919	RPB11
ncbi_3636144	1.12905	0.00696541	0.0289413	POF1
ncbi_3640224	1.13079	0.00183449	0.0100573	MRP20
ncbi_3647559	1.13388	0.00639191	0.0271733	SLM2
ncbi_3636199	1.13502	0.0025033	0.0128735	CHS3
ncbi_3639356	1.1362	0.00424569	0.0196075	LRO1
ncbi_3636901	1.13643	0.00290179	0.0144446	RSM24
ncbi_3639824	1.13733	0.00363762	0.0173381	MRPS12
ncbi_3639667	1.13889	0.00203503	0.0109487	MDH1
ncbi_3640232	1.14117	0.00171641	0.0096278	YDR341C
ncbi_3639183	1.14201	0.00167348	0.00943942	rnhA
ncbi_3647528	1.14217	0.00564671	0.0246454	CLU1
ncbi_3636897	1.14465	0.00943174	0.036463	SPP1
ncbi_3635237	1.14562	0.000890668	0.00572181	CDR1
ncbi_3639282	1.14715	0.00139659	0.00821997	SIN3
ncbi_3639569	1.14787	0.00249911	0.0128629	SUI2
ncbi_3645374	1.14805	0.00818559	0.0327532	RAD2
ncbi_3640226	1.14839	0.00201761	0.0108646	--
ncbi_3642560	1.1497	0.00672077	0.0282151	--
ncbi_3647153	1.14998	0.00392807	0.0184156	FET3
ncbi_3646071	1.15096	0.0018393	0.0100613	HRD3
ncbi_3644719	1.15147	0.00134906	0.00798888	CDC3
ncbi_3640273	1.15183	0.0045166	0.0205618	SPAC56F8.02
ncbi_3639900	1.15185	0.00331798	0.016029	NUP170
ncbi_3639886	1.15311	0.00281739	0.0141406	GIM5
ncbi_3637729	1.15312	0.00883498	0.0345975	--
ncbi_3642559	1.15375	0.0074896	0.030533	man9
ncbi_3643897	1.15379	0.00502194	0.0224646	MAG1
ncbi_3643307	1.15556	0.00560607	0.0244856	YMR102C
ncbi_3645336	1.15577	0.00931349	0.0361674	--
ncbi_3636862	1.15683	0.013729	0.0488293	VTS1
ncbi_3639335	1.15808	0.00126921	0.00760882	GSF2
ncbi_30515329	1.15827	0.0051694	0.0229697	--
ncbi_3641625	1.15855	0.00113506	0.00701655	YHK8
ncbi_3636123	1.15934	0.00143771	0.00837465	MEF1
ncbi_3647080	1.15966	0.00254115	0.0129879	FES1
ncbi_3648178	1.16186	0.00719446	0.0297299	--
ncbi_3647673	1.16188	0.00914216	0.0355705	--
ncbi_3642064	1.16194	0.000904777	0.00578539	MRPS9
ncbi_3648274	1.1621	0.0101756	0.0387808	--
ncbi_3646149	1.16264	0.0051898	0.0230159	TRM44
ncbi_3646089	1.16267	0.0100923	0.0385735	APM3
ncbi_3646245	1.16306	0.00208337	0.0111297	GYP7
ncbi_3641642	1.16322	0.00259491	0.013199	HEL2
ncbi_3634944	1.16386	0.0129643	0.0467207	SHO1
ncbi_3643345	1.16498	0.00153432	0.00877707	UTP10
ncbi_3636946	1.16584	0.00386572	0.0182245	NPA3
ncbi_3639510	1.16664	0.00726931	0.0299371	KIN28
ncbi_3639252	1.16731	0.00981603	0.0377644	--
ncbi_3646826	1.16744	0.00754056	0.0306582	RPB5
ncbi_3639849	1.16824	0.00330701	0.0159998	HAC1
ncbi_3644482	1.17301	0.00217498	0.0115417	YSP2
ncbi_3647517	1.17364	0.0117699	0.0434502	MDM34
ncbi_3639171	1.17432	0.00685675	0.0285879	--
ncbi_3640722	1.17449	0.0053031	0.0233985	MRPL3
ncbi_3639821	1.17503	0.00142813	0.00835098	MSI3
ncbi_3647683	1.17536	0.00628886	0.0267918	--
ncbi_3642025	1.17573	0.00604764	0.0260388	--
ncbi_3639859	1.17753	0.00888163	0.0347577	--
ncbi_3642507	1.17773	0.00542521	0.0238678	--
ncbi_3646835	1.17774	0.00351272	0.0167872	MAD1
ncbi_3639277	1.18089	0.00377853	0.0178831	SHE3
ncbi_3647993	1.18207	0.00289536	0.0144446	SIT4
ncbi_3637812	1.18207	0.000843313	0.00547566	MIG1
ncbi_3642006	1.18346	0.00188179	0.0102425	YJR111C
ncbi_3639163	1.18356	0.00871286	0.0343189	ITC1
ncbi_3637934	1.18357	0.00146838	0.00849417	MGM1
ncbi_3646083	1.18704	0.00112268	0.00695424	--
ncbi_3639822	1.18741	0.00614842	0.0262671	SKY1
ncbi_3637890	1.18812	0.00748389	0.0305302	RPF1
ncbi_3643191	1.18908	0.00869024	0.0342521	SGD1
ncbi_3641736	1.18939	0.00647949	0.0274687	NOG1
ncbi_3647146	1.19051	0.00729827	0.0299952	MUS81
ncbi_3644794	1.19092	0.00824709	0.0329123	MNN15
ncbi_3634887	1.19144	0.00415945	0.0193088	YKL162C
ncbi_3638446	1.19163	0.013534	0.0483141	--
ncbi_3643793	1.19227	0.0076343	0.0309562	NOP16
ncbi_3642566	1.19302	0.00125963	0.00757045	NUP57
ncbi_3636657	1.19374	0.0110653	0.0412767	UTP4
ncbi_3635649	1.19513	0.00771831	0.031255	FMS1
ncbi_3635268	1.19616	0.00321602	0.0157372	NAS6
ncbi_3640519	1.19623	0.00120572	0.00730133	DOT5
ncbi_3638447	1.19697	0.0061389	0.0262452	PRP5
ncbi_3644478	1.19793	0.00084703	0.00549391	RIA1
ncbi_3636618	1.19828	0.00277985	0.013987	KRI1
ncbi_3638908	1.19891	0.0116585	0.0431178	Acaa1a
ncbi_3643346	1.20044	0.00424647	0.0196075	ypt5
ncbi_3643802	1.20133	0.0044162	0.0201967	hyuC
ncbi_3644774	1.20206	0.012006	0.0439675	SCY1
ncbi_3647074	1.20263	0.00940467	0.0364281	RTR1
ncbi_3636866	1.20289	0.00120644	0.00730133	MIA40
ncbi_3638019	1.20291	0.00775832	0.0313751	RRP12
ncbi_3636134	1.20374	0.00236564	0.0123543	KEL3
ncbi_3645652	1.20385	0.00634912	0.0270295	NOB1
ncbi_3634915	1.2043	0.00290079	0.0144446	YTP1
ncbi_3643516	1.20477	0.0122604	0.0447432	--
ncbi_3643964	1.20654	0.00102513	0.00643214	YOR1
ncbi_3644777	1.20666	0.00756457	0.0307296	SYG1
ncbi_3637959	1.20699	0.0014968	0.00859489	--
ncbi_3640172	1.2072	0.0137182	0.0488279	--
ncbi_3647828	1.20762	0.00256957	0.0130921	RKR1
ncbi_3634933	1.20812	0.013187	0.0472424	ncs1
ncbi_3634929	1.20844	0.00084995	0.00550695	RTG1
ncbi_3636918	1.2099	0.00858059	0.0339661	SRB4
ncbi_3644059	1.21134	0.0101549	0.0387639	RSL1D1
ncbi_3641212	1.21417	0.00158847	0.00904017	RHD3
ncbi_3634913	1.2144	0.000860222	0.00555568	ZWF
ncbi_3640105	1.2147	0.0011638	0.00713591	PTC2
ncbi_3636168	1.21552	0.00512105	0.0228113	SPCC1672.09
ncbi_3646982	1.216	0.00160329	0.00910283	ggps1
ncbi_3644415	1.21609	0.00384489	0.0181405	PFS2
ncbi_3634830	1.21679	0.000486698	0.00348101	ARG5,6
ncbi_3640268	1.21733	0.00392995	0.0184156	SWC5
ncbi_3639840	1.21757	0.000198605	0.0016922	KAP123
ncbi_3640182	1.21794	0.000655131	0.00443935	HMT1
ncbi_3639368	1.21798	0.00298652	0.0147813	BUL1
ncbi_3645430	1.21892	0.000855249	0.00552945	DST1
ncbi_3638862	1.21999	0.00393795	0.018436	PEX12
ncbi_3639540	1.22002	0.0037377	0.0177037	VPS34
ncbi_3643925	1.22035	0.0133878	0.0478767	MET32
ncbi_3645869	1.22131	0.00858399	0.0339661	--
ncbi_3634865	1.22143	0.00613835	0.0262452	CPP1
ncbi_3635749	1.22205	0.00208137	0.0111297	RNA14
ncbi_3634818	1.22218	0.00258089	0.0131387	UTP7
ncbi_3634878	1.22314	0.00116222	0.00713591	CLA4
ncbi_3646291	1.22486	0.00315824	0.0155297	ALG3
ncbi_3645331	1.22566	0.0019455	0.0105252	MRX8
ncbi_3647596	1.22584	0.00611698	0.0262213	NOC2
ncbi_3639283	1.22621	0.00552302	0.0242277	YOR296W
ncbi_3636891	1.22661	0.000123114	0.00113867	PAB1
ncbi_3639177	1.22747	0.000652786	0.00442842	--
ncbi_3646085	1.22755	0.0114922	0.0425807	--
ncbi_3636126	1.22759	0.0100536	0.0384875	--
ncbi_3644583	1.2284	0.00182257	0.0100101	gal10
ncbi_3637899	1.22872	0.00282939	0.0141774	SAS10
ncbi_3637770	1.23213	0.00254269	0.0129879	IFH1
ncbi_3648378	1.23243	0.00441741	0.0201967	IPI1
ncbi_3642055	1.23492	0.010651	0.0401766	PXA2
ncbi_3634789	1.23517	0.0020833	0.0111297	PHO8
ncbi_3636176	1.23605	0.00847927	0.0336615	DUF1
ncbi_3647776	1.23629	0.00300474	0.0148553	MRM1
ncbi_3644678	1.23653	0.00246004	0.0127375	CSL4
ncbi_3639513	1.23731	0.000291222	0.00230316	SCD6
ncbi_3646357	1.23881	0.0105797	0.0400074	--
ncbi_3640197	1.23887	0.00263081	0.0133193	ESP1
ncbi_3646146	1.23931	0.00806042	0.0323592	ICL1
ncbi_3637882	1.23938	0.0015183	0.0086936	ams1
ncbi_3644784	1.23975	0.000831003	0.00541314	YPR089W
ncbi_3647989	1.23992	0.000939825	0.00597425	ssp-1
ncbi_3640977	1.24021	0.00141917	0.00830661	NOP2
ncbi_3636122	1.24038	0.000631665	0.00432387	YNL247W
ncbi_3639327	1.2405	0.000456149	0.00331337	SPE1
ncbi_3636849	1.24153	0.00220049	0.0116221	BUD20
ncbi_3634826	1.24154	0.000555324	0.00386241	HMA5
ncbi_3640741	1.24278	0.00194589	0.0105252	DEHA2F26422g
ncbi_3642007	1.24509	0.00163057	0.00924038	MRPL51
ncbi_3646280	1.24527	0.000542182	0.00377967	BRE5
ncbi_3639187	1.24534	0.000650513	0.0044229	--
ncbi_3640426	1.24579	0.00104918	0.00657282	CAB3
ncbi_3641933	1.24593	0.00863246	0.0341132	--
ncbi_3639517	1.24688	0.00799538	0.0321194	--
ncbi_3644558	1.24729	0.000815729	0.00533084	YNL193W
ncbi_3647144	1.24784	0.00026642	0.00215196	--
ncbi_3636874	1.24796	0.00080181	0.00526258	RAD16
ncbi_3642476	1.24888	0.000411313	0.00307242	MHR1
ncbi_3644010	1.24892	0.000581475	0.00401662	HYR1
ncbi_3641353	1.2504	0.00669246	0.028144	YLR149C
ncbi_3637342	1.25055	0.000164531	0.00145539	--
ncbi_3640739	1.25097	0.0072138	0.0297692	apc10
ncbi_3643305	1.25116	0.00223629	0.0117907	--
ncbi_3641371	1.25163	0.01247	0.0453713	--
ncbi_3639349	1.25227	0.0059029	0.0255062	HGC1
ncbi_3636216	1.25232	0.00441483	0.0201967	ACL4
ncbi_3634858	1.25473	0.000360796	0.00275625	NUP188
ncbi_3646069	1.25638	0.000565254	0.00392246	--
ncbi_3646133	1.25849	0.000449889	0.00327182	--
ncbi_3644762	1.26047	0.00151085	0.00866739	NEO1
ncbi_3643467	1.26072	0.0014089	0.00825447	RPF2
ncbi_3642037	1.26089	0.00741468	0.0303501	BUL2
ncbi_3645889	1.26095	0.0131302	0.0471225	svkA
ncbi_3647184	1.26167	0.000535137	0.00374349	MRPS5
ncbi_3647861	1.26276	0.00324687	0.0158243	ENP1
ncbi_3639547	1.26321	0.0015769	0.00900362	BPH1
ncbi_3647073	1.26431	0.00382309	0.0180658	EMP65
ncbi_3636924	1.26462	0.000122269	0.00113605	RPS1
ncbi_3646510	1.26555	0.000404392	0.00302819	GCD6
ncbi_3642003	1.26567	0.00113128	0.00700029	--
ncbi_3643919	1.26596	0.00668105	0.0281263	DSS1
ncbi_3640187	1.26663	0.000482061	0.0034651	mdm28
ncbi_3640301	1.26819	0.000969558	0.00614391	POP2
ncbi_3647685	1.26822	0.000404154	0.00302819	LPX1
ncbi_3643306	1.26847	0.000517046	0.00364596	RSC8
ncbi_3636166	1.26883	0.0012231	0.0073874	AKR1
ncbi_3640742	1.26922	0.000285259	0.00226785	GCS1
ncbi_3634767	1.26936	0.00289781	0.0144446	RAM2
ncbi_3644030	1.27068	0.000504491	0.0035871	YFR016C
ncbi_3647694	1.2713	0.00181843	0.0100055	AZF1
ncbi_3646824	1.27276	0.000303551	0.00237279	SPA2
ncbi_3640225	1.27374	0.000980293	0.00619897	--
ncbi_3646130	1.27459	0.00637282	0.0271113	RMD5
ncbi_3640129	1.27543	0.00520786	0.0230671	SPBC1861.04c
ncbi_3642613	1.27547	0.00610319	0.0261962	NUF2
ncbi_3645870	1.27614	0.000276	0.00220873	SEC27
ncbi_3640989	1.28009	0.000438013	0.00321634	KRE33
ncbi_3635652	1.28295	0.0011135	0.00691143	CAS5
ncbi_3646819	1.28383	0.00284757	0.0142449	--
ncbi_3644701	1.28384	0.00373053	0.0176841	cwf29
ncbi_3636169	1.28501	0.00184019	0.0100613	--
ncbi_3640185	1.286	0.000204546	0.00173623	TRX2
ncbi_3645141	1.28815	0.00582569	0.0252175	UTP11
ncbi_3638979	1.28995	0.001719	0.00963342	BFR2
ncbi_3634908	1.29015	0.00133002	0.0078884	ARP6
ncbi_3640275	1.29079	0.000695983	0.00467954	NAM2
ncbi_3634879	1.29101	0.00147873	0.0085397	TPK2
ncbi_3645884	1.29275	0.000178962	0.00154437	NPY1
ncbi_3636189	1.29366	0.00130932	0.00781464	CRF1
ncbi_3640267	1.29392	0.000165849	0.00146246	PBP2
ncbi_3634880	1.29393	0.00021473	0.00180923	--
ncbi_3644867	1.29703	0.0119984	0.0439675	MTP4
ncbi_3639857	1.29737	0.000905339	0.00578539	BMS1
ncbi_3647553	1.29755	0.00642327	0.0272625	--
ncbi_3643931	1.29769	0.00145639	0.00845098	--
ncbi_3636208	1.29783	0.00036014	0.00275625	SEC18
ncbi_3639514	1.29815	0.000419911	0.00312125	IWS1
ncbi_3646665	1.29845	0.000180958	0.00155717	sla1
ncbi_3637340	1.29854	0.000182073	0.00156454	RAD30
ncbi_3646228	1.29962	0.00333198	0.0160582	--
ncbi_3644462	1.30023	0.0050917	0.0227139	--
ncbi_3644790	1.30066	0.000286999	0.00227869	--
ncbi_3639263	1.30174	0.000750806	0.0049811	TEL1
ncbi_3642779	1.30218	0.00201139	0.0108408	CBF1
ncbi_3636143	1.30521	0.00460468	0.0208952	--
ncbi_3647608	1.30522	0.012234	0.0446735	RBL19
ncbi_3636222	1.30657	0.000359853	0.00275625	XRN1
ncbi_3639562	1.30673	0.00569606	0.024825	--
ncbi_3636443	1.307	0.000566429	0.00392405	HAS1
ncbi_3644022	1.30776	0.000854078	0.00552778	EXO84
ncbi_3639552	1.30879	0.000529482	0.00371264	--
ncbi_3642485	1.30887	0.000424056	0.00313284	YDR306C
ncbi_3646294	1.30947	0.00546746	0.0240188	CLCN5
ncbi_3645127	1.3114	0.000392998	0.0029575	SQS1
ncbi_3640247	1.31224	0.00300637	0.0148553	POX5
ncbi_3634780	1.31346	0.0021864	0.0115679	COS111
ncbi_3646418	1.31448	0.00175312	0.00975246	VPS64
ncbi_3636902	1.31466	0.000904205	0.00578539	NGG1
ncbi_3634785	1.31484	0.000674707	0.00455164	--
ncbi_3645890	1.31655	0.00451761	0.0205618	PAC1
ncbi_3640405	1.31683	0.00473747	0.0214336	bimA
ncbi_3636950	1.31687	2.48E-05	0.000306681	CUP9
ncbi_3636214	1.3174	0.000662443	0.00447889	STP2
ncbi_3647150	1.3177	0.00866902	0.034213	CLD1
ncbi_3644410	1.31966	0.00198754	0.0107217	--
ncbi_3647837	1.31971	8.47E-05	0.000849416	MAP2
ncbi_3636928	1.32024	0.000468887	0.00339775	GGA2
ncbi_3644793	1.32024	0.00130641	0.00780496	SPAC25B8.10
ncbi_3645883	1.32101	0.000112251	0.00106252	MRH4
ncbi_3636858	1.32173	0.0119374	0.0438016	EHD3
ncbi_3639827	1.324	0.00247987	0.0127941	cul1
ncbi_3639189	1.32507	0.00053837	0.00376176	YGR012W
ncbi_3646688	1.32508	0.00179225	0.00993362	SDA1
ncbi_3637718	1.32532	0.00126211	0.00757764	UTP13
ncbi_3634810	1.32659	0.000138861	0.00125743	ERO1
ncbi_3645562	1.32659	0.000443798	0.0032431	YIM1-2
ncbi_3634770	1.3267	0.00395932	0.0185217	HST1
ncbi_3639542	1.32717	7.90E-05	0.000808922	--
ncbi_3644042	1.32826	0.000602993	0.00414635	SIF2
ncbi_3641629	1.32861	0.00023003	0.00190632	VPS72
ncbi_3642044	1.32995	0.00273337	0.0137645	--
ncbi_3642039	1.33122	0.00484428	0.0218191	OCA4
ncbi_3646673	1.33132	0.000619517	0.00425032	APL3
ncbi_3641641	1.33226	0.000271485	0.00217547	ATG15
ncbi_3636124	1.33354	0.00173606	0.0096949	FAH12
ncbi_3639868	1.3345	0.00174561	0.00972852	RGD1
ncbi_3648118	1.33491	0.00366675	0.0174495	BEM1
ncbi_3636925	1.33563	9.47E-05	0.000921025	TCB3
ncbi_3644548	1.33677	0.000484832	0.00347414	TOS4
ncbi_3646660	1.33721	0.000115561	0.00109045	GRX5
ncbi_3636877	1.33767	0.00135971	0.00804405	PDE2
ncbi_3647604	1.33865	0.00247887	0.0127941	ELP4
ncbi_3646827	1.33993	0.000488906	0.00349268	RIB7
ncbi_3641805	1.34038	0.00206463	0.0110784	--
ncbi_3636882	1.34064	0.00111132	0.00690497	--
ncbi_3647530	1.34145	0.0108514	0.0407549	TRY2
ncbi_3639226	1.34151	0.000122983	0.00113867	--
ncbi_3639331	1.34242	0.0020767	0.0111297	--
ncbi_3639521	1.34275	0.000152637	0.00136989	UBP12
ncbi_3639168	1.34423	0.000144978	0.00130502	CBP3
ncbi_3643218	1.34437	0.00251363	0.0128938	YVH1
ncbi_3637371	1.34446	0.000128281	0.00117925	NNK1
ncbi_3647079	1.34455	0.0008128	0.00532318	--
ncbi_3646428	1.34513	0.000644002	0.00438417	MSD1
ncbi_3644024	1.346	0.000222105	0.00185588	CST26
ncbi_3647677	1.34607	6.75E-05	0.000714588	RPA190
ncbi_3636159	1.34682	7.46E-05	0.000770866	SPBC13G1.02
ncbi_3637859	1.34722	0.000735869	0.00491499	RAD24
ncbi_3644763	1.34903	7.11E-05	0.000743672	LYS1
gene-CAALFM_C113530WA	1.34991	0.000483919	0.00347344	-
ncbi_3645982	1.35092	0.000700321	0.00470349	YLF2
ncbi_3636173	1.35115	0.000279806	0.00223329	NUP49
ncbi_3641607	1.35221	0.000441433	0.00322971	PBN1
ncbi_3636191	1.35425	6.13E-05	0.000657688	YRB30
ncbi_3648397	1.3544	0.000638239	0.00435902	RRP15
ncbi_3646485	1.35516	0.000115777	0.00109079	CBC1
ncbi_3640733	1.35531	0.000388849	0.00292991	SFH1
ncbi_3643900	1.35585	0.000219659	0.00183797	RRP8
ncbi_3634931	1.35597	0.00610582	0.0261962	sap62
ncbi_3644027	1.35737	7.85E-05	0.000805093	PEX7
ncbi_3642058	1.35759	0.000690312	0.00464657	PKH2
ncbi_3646832	1.35817	0.00326681	0.0158704	--
ncbi_3642317	1.35836	0.000767523	0.00507225	RRP14
ncbi_3636898	1.35896	0.00143282	0.00836228	SPAC26H5.02c
ncbi_3636904	1.36025	6.70E-05	0.000711755	ROD1
ncbi_3644455	1.36118	0.000377197	0.0028492	COG3
ncbi_3636150	1.36121	3.26E-05	0.000381698	SPE4
ncbi_3638892	1.36369	0.00179894	0.00993436	VPS24
ncbi_3639377	1.3649	0.000101689	0.000979387	SNF7
ncbi_3644015	1.36694	0.00124939	0.00753118	MSY1
ncbi_3647955	1.36878	8.24E-05	0.000831605	--
ncbi_3646486	1.37016	0.000327673	0.00254819	CAF16
ncbi_3642040	1.37061	0.0044481	0.0202917	--
ncbi_3644456	1.37278	0.00051218	0.00362475	--
ncbi_3636218	1.37297	0.00789777	0.0318328	--
ncbi_3640218	1.37374	0.000165433	0.00146092	VPS17
ncbi_3646156	1.37421	0.00119415	0.00727786	RIX1
ncbi_3647143	1.3749	7.68E-05	0.000790788	NDC1
ncbi_3640288	1.37566	0.00011153	0.00105901	YMR178W
ncbi_3640200	1.37606	7.81E-05	0.000801922	-
ncbi_3635597	1.37713	0.000229965	0.00190632	ATG11
ncbi_3639295	1.37835	4.91E-05	0.00054371	HBR1
ncbi_3642004	1.379	0.00215084	0.0114497	THP1
ncbi_3636119	1.37967	0.000710819	0.00476028	SEC2
ncbi_3636223	1.38061	2.72E-05	0.000332052	--
ncbi_3645886	1.38084	8.65E-05	0.000863156	--
ncbi_3647533	1.38171	0.00066094	0.00447371	ARG2
ncbi_3639199	1.38195	7.47E-05	0.000770866	YPR097W
ncbi_3645326	1.38271	7.06E-05	0.000740174	CDC8
ncbi_3640303	1.38426	2.17E-05	0.000277963	MRP4
MSTRG.6136	1.38449	0.000270279	0.00217349	--
ncbi_3641635	1.38456	0.0044172	0.0201967	--
ncbi_3634787	1.38601	0.00209655	0.0111902	--
ncbi_3647350	1.38613	0.00126981	0.00760882	DBP6
ncbi_3646676	1.38694	0.00118925	0.00726258	--
ncbi_3646822	1.38746	9.07E-05	0.000897748	--
ncbi_3637768	1.38799	0.000209234	0.0017703	--
ncbi_3640261	1.39056	1.31E-05	0.000183856	--
ncbi_3639174	1.39076	0.00044744	0.00326185	ISA1
ncbi_3640204	1.39174	0.00218129	0.011561	RRP40
ncbi_3635617	1.39231	0.00651322	0.0275376	NCS6
ncbi_3642506	1.39451	0.00123196	0.00743346	RSM22
ncbi_3644034	1.39542	0.000229655	0.00190632	TOP1
ncbi_3637377	1.39741	0.00109309	0.00681267	NOP12
ncbi_3636829	1.40011	0.00119867	0.00728338	ATG17
ncbi_3637783	1.40013	0.000185458	0.00158975	BYE1
gene-CAALFM_C604220CA	1.40172	1.17E-05	0.000166433	-
ncbi_3642016	1.40511	0.000340618	0.00263533	BRX1
ncbi_3642503	1.40732	3.60E-05	0.000415965	--
ncbi_3639269	1.4075	0.000404259	0.00302819	FIG4
ncbi_3640201	1.41058	9.46E-05	0.000921025	--
ncbi_3642786	1.41102	0.00061711	0.00423861	--
ncbi_3636791	1.41301	0.000369856	0.00281835	PSO2
ncbi_3642027	1.41336	1.08E-05	0.000157536	RPN2
ncbi_3645224	1.41407	0.000333618	0.00258987	NOC4
ncbi_3639378	1.41471	1.94E-05	0.000252547	RPO41
ncbi_3645577	1.41692	0.000974674	0.00616988	NOP53
ncbi_3645871	1.41786	0.000471489	0.00340845	ALG11
ncbi_3639541	1.41903	0.000177488	0.00154043	--
ncbi_3643669	1.41976	0.000433734	0.00319655	--
ncbi_3636136	1.41978	0.000314579	0.00245289	--
ncbi_3644028	1.41996	0.000834775	0.00542604	YSP2
ncbi_3637394	1.4211	0.000302944	0.00237111	CHK1
ncbi_3646414	1.42172	0.000529502	0.00371264	--
ncbi_3634922	1.42189	0.00042337	0.00313284	JIP5
ncbi_3639344	1.4226	4.89E-05	0.000542706	YDR338C
ncbi_3643746	1.42545	0.000343759	0.00265624	ESF2
ncbi_3636820	1.42573	0.000133124	0.00121639	MGM101
ncbi_3639195	1.42644	0.000119493	0.00111884	cti6
ncbi_3647609	1.42685	0.000815427	0.00533084	TRS85
ncbi_3644722	1.42727	3.23E-06	6.15E-05	--
ncbi_3641603	1.429	6.49E-06	0.000107144	EBP1
ncbi_3634809	1.42907	0.000197763	0.00168739	RIM20
ncbi_3646086	1.42938	4.63E-05	0.000519732	DIA4
ncbi_3646286	1.43008	0.00615268	0.0262671	--
ncbi_3643939	1.43269	0.00355745	0.0169827	--
ncbi_3644577	1.43329	0.00130015	0.00777525	DRN1
ncbi_3643930	1.43452	0.000131556	0.00120387	FSL5
ncbi_3637891	1.43495	0.00704357	0.029246	--
ncbi_3640290	1.43514	5.23E-05	0.000575977	SNQ2
ncbi_3644449	1.43751	0.00013531	0.00122895	UTP6
ncbi_3644484	1.43868	0.00193936	0.0105252	PEX3
ncbi_3645417	1.43984	0.0058004	0.0251711	--
ncbi_3634800	1.44033	0.000374758	0.00283902	VPS41
ncbi_3647088	1.44039	0.000265144	0.00214451	SPAPB1E7.08c
ncbi_3636855	1.44237	8.31E-06	0.000129974	MAS1
ncbi_3647755	1.4449	0.00367191	0.0174603	--
ncbi_3640274	1.44537	0.00017398	0.00152088	CCM1
ncbi_3636147	1.44575	6.11E-06	0.000102852	RPN1
ncbi_3643119	1.4459	0.000345044	0.00265939	YJR149W
ncbi_3640749	1.44592	1.31E-05	0.000183856	CCR4
ncbi_3639285	1.44625	2.71E-05	0.00033112	ATG18
ncbi_3639557	1.44628	5.42E-05	0.00059138	SPBC2A9.11c
ncbi_3648170	1.44659	5.68E-07	1.49E-05	RGI1
ncbi_3643960	1.44721	0.000141794	0.00128016	PUS7
ncbi_3642467	1.44785	5.95E-06	0.000100703	CUE5
ncbi_3646145	1.44867	4.62E-05	0.000518872	sim3
ncbi_3646150	1.45208	9.46E-05	0.000921025	VPS16
ncbi_3642009	1.4534	3.24E-06	6.15E-05	SCP160
ncbi_3634813	1.45383	5.31E-05	0.000582229	MNN23
ncbi_3646817	1.45511	0.000127282	0.00117363	BCP1
ncbi_3636917	1.45557	5.36E-05	0.000586246	rpn3
ncbi_3639217	1.45724	0.00900352	0.0351212	LYS14
ncbi_3647078	1.46041	1.81E-05	0.000238098	SEC8
ncbi_3636203	1.46123	4.88E-07	1.31E-05	TYE7
ncbi_3647974	1.46171	7.16E-05	0.000745486	--
ncbi_3640241	1.46251	3.26E-05	0.000381698	NAB2
ncbi_3636193	1.46349	1.74E-06	3.67E-05	osm1
ncbi_3639526	1.46538	1.63E-05	0.00021867	CAF130
ncbi_3643300	1.4676	0.00115641	0.00712942	YPI1
ncbi_3637378	1.46996	0.00689029	0.0286685	HFM1
ncbi_3636151	1.47165	0.000120662	0.0011257	--
ncbi_3644428	1.47239	0.000242381	0.00199232	RIO1
ncbi_3648115	1.47371	0.00139759	0.00821997	LPL1
ncbi_3645426	1.47466	6.73E-05	0.00071431	TMA64
ncbi_3634863	1.47531	8.34E-06	0.000129974	YJU3
ncbi_3636796	1.47585	0.000515792	0.00364596	BOS1
ncbi_3636179	1.47696	0.0112596	0.0418215	GRDP1
ncbi_3634883	1.47976	0.00332446	0.0160475	--
ncbi_3641770	1.48011	0.00119208	0.00727255	--
ncbi_3646278	1.48019	1.46E-06	3.24E-05	CDC39
ncbi_3639270	1.481	0.00119801	0.00728338	--
ncbi_3642273	1.4866	0.00115759	0.00712942	--
ncbi_3636826	1.48667	0.013011	0.0468002	--
ncbi_3636619	1.48684	0.0111901	0.0416421	--
ncbi_3642018	1.48757	4.72E-05	0.000527328	AN10929
ncbi_3636825	1.48891	0.00012052	0.0011257	iec1
ncbi_3646233	1.48902	0.00526284	0.0232548	ISY1
ncbi_3643933	1.48982	0.00330931	0.0159998	--
ncbi_3645324	1.49006	2.26E-05	0.000286448	mus-51
ncbi_3638534	1.49218	0.00151605	0.00868894	LYS14
ncbi_3640239	1.49474	6.17E-06	0.000103374	COQ8
ncbi_3643145	1.49648	0.000295845	0.00232707	NOC3
ncbi_3635856	1.49837	0.00171051	0.0096125	GRDP1
ncbi_3640296	1.49982	0.00062295	0.00426904	nirA
ncbi_3639220	1.50063	3.08E-05	0.000367955	cnp3
ncbi_3648216	1.50163	2.62E-05	0.000321571	--
ncbi_3642479	1.50273	9.33E-05	0.000916151	--
ncbi_3636926	1.5039	1.74E-05	0.000231467	CAALFM_C103120WA
ncbi_3636848	1.50511	1.12E-05	0.000162136	OTU1
ncbi_3639234	1.50631	8.35E-06	0.000129974	APA2
ncbi_3639196	1.51038	1.56E-05	0.000212679	VPS45
ncbi_3644404	1.51372	5.82E-06	9.90E-05	FMP40
ncbi_3647682	1.51745	3.56E-06	6.60E-05	CBF5
ncbi_3642313	1.51777	0.000241651	0.00198902	NSA1
ncbi_3642295	1.52015	1.65E-06	3.52E-05	gdh-1
ncbi_3642334	1.52019	1.56E-06	3.38E-05	fer8
ncbi_3643303	1.52053	0.00215489	0.0114612	FTR1
ncbi_3643654	1.5227	0.00554932	0.0242857	SPBC460.04c
ncbi_3640299	1.52328	5.57E-06	9.55E-05	NOG2
ncbi_3639359	1.52917	9.73E-05	0.000943121	--
ncbi_3645316	1.52928	0.00010662	0.00102038	AVT4
ncbi_3639891	1.53146	3.72E-06	6.87E-05	ECM5
ncbi_3639210	1.53214	3.50E-06	6.52E-05	CDC37
ncbi_3639178	1.53342	0.000246462	0.00202039	RPC34
ncbi_3636669	1.53662	8.08E-05	0.000821232	PRP43
ncbi_3636633	1.53729	0.00794682	0.0319879	RRT14
ncbi_3640310	1.53826	7.24E-06	0.000117007	IZH3
ncbi_3640177	1.54044	2.02E-06	4.14E-05	ZPR1
ncbi_3640189	1.54239	3.71E-05	0.000425589	--
ncbi_3634765	1.54288	4.51E-05	0.000508813	YTM1
ncbi_3634784	1.54482	3.93E-05	0.000449644	ECM21
ncbi_3636913	1.54672	1.54E-05	0.000210923	csx2
ncbi_3639488	1.54986	0.000159151	0.00141577	SPAC637.09
ncbi_3639243	1.54999	1.62E-06	3.50E-05	--
ncbi_3641921	1.55119	4.23E-06	7.58E-05	THI13
ncbi_3642489	1.55228	2.78E-05	0.0003369	--
ncbi_3645881	1.55262	0.000106578	0.00102038	PUS1
ncbi_3634914	1.5542	2.73E-06	5.29E-05	KEX2
ncbi_3647527	1.5565	1.06E-05	0.000155617	UFO1
ncbi_3638911	1.557	0.00144343	0.00839185	--
ncbi_3645411	1.56142	8.72E-05	0.00086765	MAK32
ncbi_3634928	1.56156	4.24E-05	0.000483379	--
ncbi_3639317	1.56387	1.05E-06	2.49E-05	UBP6
ncbi_3636880	1.5722	2.13E-06	4.32E-05	SWP1
ncbi_3644551	1.57376	7.66E-07	1.90E-05	YLR177W
ncbi_3634850	1.5758	1.48E-06	3.28E-05	TFA1
ncbi_3644702	1.57592	1.33E-05	0.000185896	ERB1
ncbi_3640193	1.57633	0.000482185	0.0034651	ENV9
ncbi_3642482	1.57644	0.000178302	0.00154437	PAP2
ncbi_3639865	1.57661	1.10E-05	0.000159558	SIP5
ncbi_3644105	1.57778	1.59E-06	3.45E-05	NOP7
ncbi_3643322	1.57862	0.000258927	0.00210548	--
ncbi_3641647	1.58093	1.84E-05	0.000240971	ATL44
ncbi_3644590	1.58103	0.000896375	0.00574629	SET6
ncbi_3647186	1.58421	2.30E-06	4.61E-05	DJP1
ncbi_3644033	1.58484	0.00808795	0.0324482	--
ncbi_3644040	1.58566	8.20E-06	0.000128617	VPS15
ncbi_3640746	1.58782	0.000283835	0.00225949	nth1
ncbi_3634834	1.59279	3.38E-06	6.37E-05	--
ncbi_3644780	1.59375	8.40E-08	2.87E-06	AAD16
ncbi_3639354	1.59415	1.64E-06	3.51E-05	GEM1
ncbi_3644052	1.59424	6.38E-06	0.000106222	SEC9
ncbi_3644592	1.59722	0.000449884	0.00327182	ABP140
ncbi_3639352	1.60068	1.38E-06	3.10E-05	RRS1
ncbi_3636228	1.61636	0.000116784	0.00109857	KNS1
ncbi_3641631	1.61825	8.10E-06	0.000127786	chmp5
ncbi_3648295	1.6185	6.12E-05	0.000657688	--
ncbi_3634804	1.61918	2.03E-05	0.000262169	--
ncbi_3634849	1.62344	2.43E-07	7.32E-06	YPL260W
ncbi_3644534	1.6247	2.79E-07	8.08E-06	PCFS4
ncbi_3646234	1.62489	5.29E-05	0.000581181	ENP2
ncbi_3648166	1.62812	1.18E-05	0.000167925	--
ncbi_3644764	1.62842	9.15E-05	0.000902449	RSA3
ncbi_3640250	1.63714	4.61E-05	0.000518872	--
ncbi_3642063	1.64003	7.61E-07	1.90E-05	DIS3
ncbi_3637832	1.64008	0.000741794	0.00493823	SEN2
ncbi_3647670	1.6402	8.68E-05	0.000865236	TRY2
ncbi_3638932	1.64436	0.000517109	0.00364596	rlmE
ncbi_30515035	1.64676	0.00624958	0.0266432	--
ncbi_3644684	1.65232	9.02E-08	3.04E-06	RPN4
ncbi_3645903	1.65421	5.87E-05	0.000637551	DBP7
ncbi_3640233	1.65461	1.53E-06	3.34E-05	--
ncbi_3636801	1.65577	0.00683096	0.0285088	prnB
ncbi_3638329	1.65673	1.81E-06	3.79E-05	--
ncbi_3645888	1.65674	8.39E-05	0.000843136	LPE10
ncbi_3644458	1.66508	6.80E-07	1.74E-05	YPD1
ncbi_3640184	1.66864	0.000107332	0.00102558	MTC4
ncbi_3639241	1.66891	0.00481317	0.0216951	POP4
ncbi_3647196	1.67016	2.68E-05	0.000327955	--
ncbi_3642049	1.67103	0.000262913	0.00213202	--
ncbi_3634904	1.67129	2.57E-06	5.01E-05	MNN12
ncbi_3646413	1.67616	0.00393002	0.0184156	ERF2
ncbi_3646084	1.67688	4.77E-09	2.53E-07	NOP58
ncbi_3644598	1.68037	3.82E-09	2.11E-07	CAX4
ncbi_3640707	1.68069	0.00165888	0.00937452	MTO1
ncbi_3638469	1.68086	1.91E-05	0.000249355	NOP13
ncbi_3639839	1.68816	6.13E-05	0.000657688	FAL1
ncbi_3639336	1.69121	0.00883111	0.0345975	--
ncbi_3634848	1.69316	3.89E-06	7.15E-05	STS1
ncbi_3646412	1.69343	8.52E-05	0.000852885	--
ncbi_3640308	1.69496	2.06E-08	9.16E-07	--
ncbi_3639212	1.6973	4.13E-08	1.62E-06	PEP3
ncbi_3642468	1.69956	8.12E-06	0.000127786	YKR070W
ncbi_3639245	1.70115	1.13E-05	0.000162351	--
ncbi_3638502	1.70536	5.15E-05	0.000567946	RRP1
ncbi_3645866	1.7056	1.52E-06	3.33E-05	LSG1
ncbi_3644452	1.70622	3.12E-09	1.77E-07	TDA3
ncbi_3636811	1.70999	2.18E-07	6.60E-06	ARX1
ncbi_3636182	1.71116	6.77E-07	1.74E-05	YDR061W
ncbi_3639496	1.71168	8.43E-06	0.000130978	RAI1
ncbi_3648179	1.71328	3.15E-05	0.000372727	SPB1
ncbi_3640762	1.71477	3.95E-07	1.11E-05	DIP2
ncbi_3646425	1.71682	1.14E-06	2.67E-05	KTR4
ncbi_3639820	1.71756	4.07E-07	1.13E-05	NPL4
ncbi_3634808	1.71803	1.39E-06	3.12E-05	CEF1
ncbi_3636859	1.71885	4.17E-06	7.51E-05	ATG21
ncbi_3647563	1.72284	5.21E-06	9.07E-05	--
ncbi_3639326	1.723	6.10E-08	2.21E-06	VPS27
ncbi_3646818	1.73175	0.000790467	0.00520506	CDC40
ncbi_3636559	1.73227	2.15E-06	4.35E-05	--
ncbi_3634916	1.73471	2.86E-08	1.19E-06	NAR1
ncbi_3644466	1.73679	2.07E-08	9.16E-07	UBX5
ncbi_30514958	1.73784	0.00391123	0.0183819	--
ncbi_3639491	1.74105	3.91E-08	1.55E-06	PCL7
ncbi_3639489	1.74127	0.000166982	0.00146818	--
ncbi_3647956	1.74366	3.47E-06	6.49E-05	UTP20
ncbi_3643453	1.74376	0.000262042	0.00212795	BMT2
ncbi_3640745	1.74736	0.00125947	0.00757045	CAT8
ncbi_3645360	1.74767	0.00672773	0.0282248	THI74
ncbi_3647531	1.74898	8.12E-06	0.000127786	RHD1
ncbi_3640195	1.75	1.46E-09	9.38E-08	RPS4
ncbi_3646675	1.75168	0.000474043	0.00342282	RIB2
ncbi_3639882	1.76034	0.000240143	0.0019793	PIR
ncbi_3639341	1.76155	5.24E-09	2.76E-07	NSR1
ncbi_3646429	1.76325	1.44E-05	0.000197807	NOP9
ncbi_3636574	1.7788	0.0065852	0.0277808	RKI1
ncbi_3641645	1.77987	8.25E-07	2.02E-05	FMP27
gene-CAALFM_C106760CA	1.78494	5.29E-06	9.14E-05	-
ncbi_3639167	1.7926	8.71E-09	4.40E-07	--
ncbi_3640706	1.79833	7.10E-06	0.000115387	CMS1
ncbi_3644029	1.80232	1.25E-06	2.89E-05	YGR053C
ncbi_3639278	1.80465	1.78E-05	0.000235	ASA1
ncbi_3640725	1.80523	0.000102069	0.000981484	--
ncbi_3634851	1.81001	0.000441195	0.00322971	MOD5
ncbi_3636212	1.81356	2.02E-10	1.83E-08	TEA1
ncbi_3644032	1.816	1.29E-07	4.12E-06	--
ncbi_3639838	1.8166	3.91E-06	7.16E-05	uck2a
ncbi_3639236	1.82263	2.05E-08	9.16E-07	STE23
ncbi_3647535	1.82469	1.18E-08	5.70E-07	RRP6
ncbi_3640724	1.82628	5.88E-06	9.97E-05	RRP17
ncbi_3647601	1.82947	9.08E-08	3.04E-06	CHR1
ncbi_3647671	1.83727	0.000134315	0.00122358	GPT1
ncbi_3639179	1.83761	1.27E-05	0.000180422	--
ncbi_3639520	1.84108	3.08E-09	1.76E-07	RRP43
ncbi_3634802	1.84282	0.000164566	0.00145539	--
ncbi_3645579	1.85275	0.000216749	0.00182118	--
ncbi_3639358	1.85371	2.24E-08	9.76E-07	ATG3
ncbi_3647679	1.85415	0.000485163	0.00347414	--
ncbi_3644761	1.85775	7.67E-10	5.59E-08	rngtt
ncbi_3634792	1.85844	1.73E-09	1.08E-07	MSS116
ncbi_3639219	1.86558	1.28E-09	8.54E-08	MRT4
ncbi_3634946	1.86807	1.02E-07	3.35E-06	AOX1
ncbi_3648377	1.87831	0.0113986	0.0423117	--
ncbi_3646834	1.88054	8.10E-06	0.000127786	prp1
ncbi_3645431	1.88205	9.71E-08	3.22E-06	RNA15
ncbi_3641624	1.88342	7.59E-06	0.000121951	--
ncbi_3639872	1.88829	1.19E-09	8.16E-08	LSB6
ncbi_3639878	1.8985	1.02E-05	0.000152492	PIR
ncbi_3634882	1.90185	1.82E-05	0.000239604	--
ncbi_3637381	1.90453	4.11E-09	2.22E-07	--
ncbi_3644542	1.90812	2.20E-08	9.64E-07	KRR1
ncbi_3640751	1.91398	2.36E-05	0.000297226	ADH2
ncbi_3646833	1.91466	2.65E-10	2.18E-08	RRB1
ncbi_3641598	1.91967	3.42E-09	1.92E-07	DBP9
ncbi_3636213	1.92533	3.21E-08	1.30E-06	CYB2
ncbi_3646427	1.93403	2.37E-13	3.99E-11	vrdA
ncbi_3647850	1.93615	9.50E-06	0.000143917	--
ncbi_3644427	1.93637	2.47E-08	1.06E-06	ESF1
ncbi_3646424	1.94719	2.35E-10	2.03E-08	CUZ1
ncbi_3636900	1.94806	4.57E-09	2.45E-07	YMR114C
ncbi_3634833	1.95505	3.50E-09	1.95E-07	--
ncbi_3640263	1.95915	2.45E-06	4.85E-05	CUS2
ncbi_3645334	1.9621	1.36E-06	3.06E-05	JLP1
ncbi_3647991	1.97993	3.47E-10	2.81E-08	NOP4
ncbi_3644050	1.98104	0.00389018	0.0183168	KAR5
ncbi_3638328	1.98572	1.86E-08	8.52E-07	--
ncbi_3643334	1.98574	0.00317911	0.015607	--
ncbi_3644586	2.024	4.07E-09	2.22E-07	UBP16
ncbi_3644417	2.04234	1.56E-09	9.84E-08	PET127
ncbi_3642045	2.08363	3.93E-06	7.16E-05	YJR111C
ncbi_3634919	2.09275	0.00120644	0.00730133	--
ncbi_3646656	2.09601	2.34E-05	0.000295226	URB1
ncbi_3642965	2.11432	6.80E-05	0.000718741	--
ncbi_3638875	2.12268	8.48E-16	1.97E-13	HXT6
MSTRG.5675	2.12341	0.000575665	0.00398103	--
ncbi_3644549	2.15802	0.0023058	0.0121044	PRM1
ncbi_3644681	2.16681	4.80E-08	1.82E-06	RPP1
ncbi_3645863	2.17076	0.00027052	0.00217349	--
ncbi_3641614	2.18495	0.000204962	0.00173659	GBU1
ncbi_3639877	2.18555	1.24E-10	1.17E-08	PIR
ncbi_3639012	2.21155	2.66E-10	2.18E-08	--
ncbi_3636802	2.21559	0.000295007	0.00232702	BAT1
ncbi_3642010	2.23611	3.17E-11	3.37E-09	--
ncbi_3647536	2.24377	1.39E-12	2.11E-10	REI1
ncbi_3646290	2.25188	6.13E-12	7.69E-10	NOP8
ncbi_3646659	2.2987	3.19E-05	0.000377276	srk1
ncbi_3647591	2.29938	3.26E-05	0.000381698	RNR1
ncbi_3637709	2.31191	0.00296421	0.014707	pac2
ncbi_3644460	2.31675	9.49E-16	2.13E-13	--
ncbi_3636135	2.35034	7.77E-09	4.02E-07	DIM1
ncbi_3642282	2.35636	8.46E-06	0.000131112	GYG1
ncbi_3639230	2.38397	2.17E-17	6.26E-15	--
ncbi_3639294	2.39849	7.72E-06	0.000123473	HMX1
ncbi_3634868	2.42405	4.86E-14	8.41E-12	DBP3
ncbi_3640229	2.42501	0.000447162	0.00326185	--
ncbi_3644792	2.45503	0.000556889	0.00386885	--
ncbi_3641891	2.46271	1.98E-18	6.31E-16	AAEL010189
ncbi_3639870	2.46866	0.00197832	0.0106815	DIP5
ncbi_3636649	2.47427	6.04E-10	4.51E-08	URA3
ncbi_3644682	2.51245	1.58E-15	3.30E-13	FPR3
ncbi_3635654	2.69044	7.24E-05	0.000751144	BMT9
ncbi_3644703	2.77272	3.85E-22	1.79E-19	vrdA
ncbi_3638300	2.88062	8.11E-07	1.99E-05	SPBC460.04c
ncbi_3639546	3.04168	5.38E-19	1.92E-16	HAK1
ncbi_3646426	3.21061	1.07E-11	1.28E-09	SPAC977.14c
ncbi_3636501	9.50626	1.80E-97	5.46E-94	HIS1
ncbi_3642490	11.4528	0.00116264	0.00713591	--
