# Supplementary material for: Loss of Gst1 enhances resistance to MMS by reprogramming the transcription of DNA damage response genes in a Rad53-dependent manner in Candida albicans
Source: Springer Nature journal article supplement (doi:10.1186/s12964-024-01865-7), 2024-10-14
Supplement: MOESM4 [file 12964_2024_1865_MOESM4_ESM.xlsx]

## Sheet: BWP17-MMS-vs-GST1-KO-MMS.filter
id	BWP17-MMS-1_count	BWP17-MMS-2_count	GST1-KO-MMS-1_count	GST1-KO-MMS-2_count	BWP17-MMS-1_fpkm	BWP17-MMS-2_fpkm	GST1-KO-MMS-1_fpkm	GST1-KO-MMS-2_fpkm	BWP17-MMS_mean	GST1-KO-MMS_mean	log2(fc)	PValue	FDR	Symbol	Gene	Description	Description	KEGG_A_class	KEGG_B_class	Pathway	K_ID	GO Component	GO Function	GO Process
ncbi_3646426	17	50	227	206	1.384	3.657	18.463	16.243	2.5205	17.353	2.7834	4.07e-11	5.22e-09	SPAC977.14c	orf19.4476	Protein with a NADP-dependent oxidoreductase domain; transcript induced by ketoconazole; rat catheter and Spider biofilm induced	XP_710017.2 hypothetical protein CAALFM_C104010CA [Candida albicans SC5314]	-	-	-	-	-	GO:0047834//D-threo-aldose 1-dehydrogenase activity	-
ncbi_3639870	8	12	66	49	0.409	0.552	3.373	2.428	0.4805	2.9005	2.59369	3.34e-05	0.00109169	DIP5	orf19.2445	Putative dicarboxylic amino acid permease; fungal-specific (no human or murine homolog); induced by alpha pheromone in SpiderM medium	XP_718468.2 hypothetical protein CAALFM_C106000WA [Candida albicans SC5314]	-	-	-	-	GO:0016020//membrane	GO:0015495//gamma-aminobutyric acid:proton symporter activity;GO:0022857//transmembrane transporter activity	GO:0006810//transport;GO:0009450//gamma-aminobutyric acid catabolic process;GO:0055085//transmembrane transport
ncbi_3636649	109	116	419	637	11.295	10.8	43.384	63.941	11.0475	53.6625	2.28019	6.3e-14	1.06e-11	URA3	URA3	Orotidine-5'-phosphate decarboxylase; pyrimidine biosynthesis; gene used as genetic marker; decreased expression when integrated at ectopic chromosomal locations can cause defects in hyphal growth and virulence; Spider biofilm repressed	XP_721787.2 orotidine-5'-phosphate decarboxylase [Candida albicans SC5314]	Metabolism;Metabolism	Global and overview maps;Nucleotide metabolism	ko01100//Metabolic pathways;ko00240//Pyrimidine metabolism	K01591;K01591	GO:0005575//cellular_component;GO:0005576//extracellular region;GO:0005622//intracellular;GO:0005623//cell;GO:0005634//nucleus;GO:0005737//cytoplasm;GO:0005829//cytosol;GO:0031012//extracellular matrix;GO:0043226//organelle;GO:0043227//membrane-bounded organelle;GO:0043229//intracellular organelle;GO:0043231//intracellular membrane-bounded organelle;GO:0044421//extracellular region part;GO:004442…	GO:0003674//molecular_function;GO:0003824//catalytic activity;GO:0004588//orotate phosphoribosyltransferase activity;GO:0004590//orotidine-5'-phosphate decarboxylase activity;GO:0005488//binding;GO:0005515//protein binding;GO:0016740//transferase activity;GO:0016757//transferase activity, transferring glycosyl groups;GO:0016763//transferase activity, transferring pentosyl groups;GO:0016829//lyase…	GO:0000003//reproduction;GO:0000909//sporocarp development involved in sexual reproduction;GO:0003006//developmental process involved in reproduction;GO:0006139//nucleobase-containing compound metabolic process;GO:0006206//pyrimidine nucleobase metabolic process;GO:0006207//'de novo' pyrimidine nucleobase biosynthetic process;GO:0006213//pyrimidine nucleoside metabolic process;GO:0006220//pyrimid…
ncbi_3635843	8	18	37	80	0.977	1.975	4.514	9.462	1.476	6.988	2.24319	0.000564108	0.00984018	DDI2	orf19.1449	Protein of unknown function; induced in azole-resistant strain that overexpresses MDR1; protein present in exponential and stationary growth phase yeast cultures; Spider biofilm induced	KHC66547.1 cyanamide hydratase family HD domain-containing protein, partial [Candida albicans P75010]	Metabolism	Xenobiotics biodegradation and metabolism	ko00791//Atrazine degradation	K06035	-	-	-
ncbi_3639012	205	158	720	794	8.479	5.871	29.754	31.811	7.175	30.7825	2.10106	3.2e-16	7.45e-14	--	IFA14	Putative LPF family protein; Plc1-regulated; induced by alpha pheromone in SpiderM medium	XP_719312.1 Ifa14p [Candida albicans SC5314]	-	-	-	-	-	GO:0005515//protein binding	-
ncbi_30515054	8	15	57	34	1.971	3.32	14.03	8.113	2.6455	11.0715	2.06524	0.00231477	0.0272064	--	orf19.8278	Predicted ORF from original SGTC Assembly 19 annotation, removed from the reduced ORF set by the SGTC; subsequently reinstated in Assembly 21 based on comparative genome analysis	XP_019330702.1 hypothetical protein CAALFM_C111410CA [Candida albicans SC5314]	-	-	-	-	GO:0030867//rough endoplasmic reticulum membrane	GO:0016757//transferase activity, transferring glycosyl groups	GO:0023041//neuronal signal transduction
ncbi_3644703	503	430	1948	1308	40.945	31.448	158.437	103.133	36.1965	130.785	1.85327	1.47e-15	3.17e-13	vrdA	IFD6	Aldo-keto reductase; similar to aryl alcohol dehydrogenases; protein increase correlates with MDR1 overexpression (not CDR1 or CDR2) in fluconazole-resistant clinical isolates; farnesol regulated; possibly essential; Spider biofilm induced	XP_713652.2 Ifd6p [Candida albicans SC5314]	-	-	-	-	-	GO:0047834//D-threo-aldose 1-dehydrogenase activity	-
ncbi_3644792	34	54	170	116	4.08	5.823	20.385	13.485	4.9515	16.935	1.77407	1.4e-05	0.000535822	--	orf19.751	Ortholog of C. dubliniensis CD36 : Cd36_04660, Candida tropicalis NEW ASSEMBLY : CTRG1_04484, Candida tropicalis MYA-3404 : CTRG_04484 and Candida albicans WO-1 : CAWG_00904	XP_713561.1 hypothetical protein CAALFM_C104930CA [Candida albicans SC5314]	-	-	-	-	-	GO:0005515//protein binding	-
ncbi_3636186	22	17	58	71	3.744	2.6	9.864	11.705	3.172	10.7845	1.76549	0.00100056	0.015141	ATG12	orf19.5033	Ortholog(s) have Atg8 ligase activity, enzyme activator activity, protein tag activity	Q5AKU4.1 RecName: Full=Ubiquitin-like protein ATG12; AltName: Full=Autophagy-related protein 12 [Candida albicans SC5314]	Cellular Processes;Cellular Processes	Transport and catabolism;Transport and catabolism	ko04138//Autophagy - yeast;ko04136//Autophagy - other	K08336;K08336	GO:0000407//pre-autophagosomal structure;GO:0005575//cellular_component;GO:0005622//intracellular;GO:0005623//cell;GO:0005737//cytoplasm;GO:0005773//vacuole;GO:0005776//autophagosome;GO:0005829//cytosol;GO:0012506//vesicle membrane;GO:0016020//membrane;GO:0030139//endocytic vesicle;GO:0030659//cytoplasmic vesicle membrane;GO:0030666//endocytic vesicle membrane;GO:0030670//phagocytic vesicle membr…	GO:0003674//molecular_function;GO:0003824//catalytic activity;GO:0008047//enzyme activator activity;GO:0016740//transferase activity;GO:0019776//Atg8 ligase activity;GO:0030234//enzyme regulator activity;GO:0031386//protein tag;GO:0098772//molecular function regulator	GO:0000045//autophagosome assembly;GO:0000272//polysaccharide catabolic process;GO:0000422//mitophagy;GO:0002165//instar larval or pupal development;GO:0002376//immune system process;GO:0005975//carbohydrate metabolic process;GO:0005976//polysaccharide metabolic process;GO:0005977//glycogen metabolic process;GO:0005980//glycogen catabolic process;GO:0006073//cellular glucan metabolic process;GO:0…
ncbi_3638875	1466	1517	5163	4319	74.741	69.475	262.913	213.207	72.108	238.06	1.72309	2.55e-20	1.03e-17	HXT6	HGT8	High-affinity glucose transporter of the major facilitator superfamily; 20 members in the C. albicans glucose transporter family; 12 probable membrane-spanning segments; gene has intron; expressed in rich medium; flow model biofilm induced	XP_719471.2 Hgt8p [Candida albicans SC5314]	Cellular Processes	Cell growth and death	ko04113//Meiosis - yeast	K08139	GO:0005887//integral component of plasma membrane;GO:0016021//integral component of membrane	GO:0008028//monocarboxylic acid transmembrane transporter activity;GO:0015238//drug transmembrane transporter activity;GO:0015295//solute:proton symporter activity;GO:0022857//transmembrane transporter activity;GO:0042910//xenobiotic transporter activity;GO:0051119//sugar transmembrane transporter activity	GO:0006810//transport;GO:0008643//carbohydrate transport;GO:0015718//monocarboxylic acid transport;GO:0015893//drug transport;GO:0042908//xenobiotic transport;GO:0055085//transmembrane transport
ncbi_3640751	62	96	228	267	4.989	6.94	18.331	20.812	5.9645	19.5715	1.71428	3.95e-07	2.63e-05	ADH2	ADH2	Alcohol dehydrogenase; soluble in hyphae; expression regulated by white-opaque switching; regulated by Ssn6; indued by Mnl1 in weak acid stress; protein enriched in stationary phase yeast cultures; Spider biofilm induced	XP_717649.1 alcohol dehydrogenase [Candida albicans SC5314]	Metabolism;Metabolism;Metabolism;Metabolism;Metabolism	Global and overview maps;Global and overview maps;Carbohydrate metabolism;Lipid metabolism;Amino acid metabolism	ko01100//Metabolic pathways;ko01110//Biosynthesis of secondary metabolites;ko00010//Glycolysis / Gluconeogenesis;ko00071//Fatty acid degradation;ko00350//Tyrosine metabolism	K13953;K13953;K13953;K13953;K13953	GO:0000312//plastid small ribosomal subunit;GO:0005575//cellular_component;GO:0005576//extracellular region;GO:0005622//intracellular;GO:0005623//cell;GO:0005737//cytoplasm;GO:0022627//cytosolic small ribosomal subunit;GO:0031012//extracellular matrix;GO:0044421//extracellular region part;GO:0044424//intracellular part;GO:0044464//cell part	GO:0003674//molecular_function;GO:0003735//structural constituent of ribosome;GO:0003824//catalytic activity;GO:0004022//alcohol dehydrogenase (NAD) activity;GO:0004024//alcohol dehydrogenase activity, zinc-dependent;GO:0005488//binding;GO:0008270//zinc ion binding;GO:0008743//L-threonine 3-dehydrogenase activity;GO:0016491//oxidoreductase activity;GO:0016614//oxidoreductase activity, acting on C…	GO:0006113//fermentation;GO:0006412//translation;GO:0006567//threonine catabolic process;GO:0008150//biological_process;GO:0008152//metabolic process;GO:0009404//toxin metabolic process;GO:0010127//mycothiol-dependent detoxification;GO:0019439//aromatic compound catabolic process;GO:0030494//bacteriochlorophyll biosynthetic process;GO:0046292//formaldehyde metabolic process;GO:0055114//oxidation-…
ncbi_3644598	1822	2252	6201	6546	211.436	234.796	719.009	735.819	223.116	727.414	1.70498	3.18e-17	8.75e-15	CAX4	CWH8	Putative dolichyl pyrophosphate (Dol-P-P) phosphatase; ketoconazole-induced; expression is increased in a fluconazole-resistant isolate; clade-associated gene expression; Hap43p-induced gene	XP_713776.1 Cwh8p [Candida albicans SC5314]	Metabolism	Glycan biosynthesis and metabolism	ko00510//N-Glycan biosynthesis	K07252	GO:0005575//cellular_component;GO:0005622//intracellular;GO:0005623//cell;GO:0005737//cytoplasm;GO:0005773//vacuole;GO:0005783//endoplasmic reticulum;GO:0005789//endoplasmic reticulum membrane;GO:0009507//chloroplast;GO:0009526//plastid envelope;GO:0009528//plastid inner membrane;GO:0009536//plastid;GO:0009706//chloroplast inner membrane;GO:0009941//chloroplast envelope;GO:0012505//endomembrane s…	GO:0003674//molecular_function;GO:0003824//catalytic activity;GO:0008195//phosphatidate phosphatase activity;GO:0008474//palmitoyl-(protein) hydrolase activity;GO:0016462//pyrophosphatase activity;GO:0016787//hydrolase activity;GO:0016788//hydrolase activity, acting on ester bonds;GO:0016790//thiolester hydrolase activity;GO:0016791//phosphatase activity;GO:0016817//hydrolase activity, acting on …	GO:0000003//reproduction;GO:0002084//protein depalmitoylation;GO:0003006//developmental process involved in reproduction;GO:0006464//cellular protein modification process;GO:0006486//protein glycosylation;GO:0006487//protein N-linked glycosylation;GO:0006488//dolichol-linked oligosaccharide biosynthetic process;GO:0006489//dolichyl diphosphate biosynthetic process;GO:0006490//oligosaccharide-lipi…
ncbi_3639336	32	45	100	133	7.747	9.788	24.19	31.189	8.7675	27.6895	1.6591	0.000114446	0.00287443	--	orf19.6083	Has domain(s) with predicted nucleic acid binding, nucleotide binding activity	XP_719045.1 hypothetical protein CAALFM_C100200CA [Candida albicans SC5314]	-	-	-	-	-	GO:0003676//nucleic acid binding	-
ncbi_30515248	1402	1701	4065	5313	254.017	276.892	735.897	932.435	265.454	834.166	1.65187	7.21e-13	1.06e-10	SOD1	SOD1	Cytosolic copper- and zinc-containing superoxide dismutase; role in protection from oxidative stress; required for full virulence; alkaline induced by Rim101; induced by human blood; rat catheter, flow model and Spider biofilm repressed	XP_019330913.1 superoxide dismutase [Candida albicans SC5314]	Cellular Processes;Organismal Systems	Transport and catabolism;Aging	ko04146//Peroxisome;ko04213//Longevity regulating pathway - multiple species	K04565;K04565	GO:0000323//lytic vacuole;GO:0005575//cellular_component;GO:0005576//extracellular region;GO:0005615//extracellular space;GO:0005622//intracellular;GO:0005623//cell;GO:0005634//nucleus;GO:0005654//nucleoplasm;GO:0005737//cytoplasm;GO:0005739//mitochondrion;GO:0005740//mitochondrial envelope;GO:0005758//mitochondrial intermembrane space;GO:0005759//mitochondrial matrix;GO:0005764//lysosome;GO:0005…	GO:0003674//molecular_function;GO:0003824//catalytic activity;GO:0004784//superoxide dismutase activity;GO:0005488//binding;GO:0005507//copper ion binding;GO:0005515//protein binding;GO:0008270//zinc ion binding;GO:0016209//antioxidant activity;GO:0016491//oxidoreductase activity;GO:0016721//oxidoreductase activity, acting on superoxide radicals as acceptor;GO:0017016//Ras GTPase binding;GO:00170…	GO:0000003//reproduction;GO:0000187//activation of MAPK activity;GO:0000302//response to reactive oxygen species;GO:0000303//response to superoxide;GO:0000305//response to oxygen radical;GO:0000902//cell morphogenesis;GO:0000904//cell morphogenesis involved in differentiation;GO:0001300//chronological cell aging;GO:0001306//age-dependent response to oxidative stress;GO:0001315//age-dependent resp…
ncbi_3645334	150	135	535	322	10.885	8.802	38.791	22.634	9.8435	30.7125	1.64158	2.53e-08	2.29e-06	JLP1	orf19.1167	Ortholog(s) have sulfonate dioxygenase activity and role in sulfur compound catabolic process	XP_713033.1 sulfonate dioxygenase [Candida albicans SC5314]	-	-	-	-	GO:0005575//cellular_component;GO:0005622//intracellular;GO:0005623//cell;GO:0005737//cytoplasm;GO:0044424//intracellular part;GO:0044464//cell part	GO:0000907//sulfonate dioxygenase activity;GO:0000908//taurine dioxygenase activity;GO:0003674//molecular_function;GO:0003824//catalytic activity;GO:0005488//binding;GO:0016491//oxidoreductase activity;GO:0016705//oxidoreductase activity, acting on paired donors, with incorporation or reduction of molecular oxygen;GO:0016706//oxidoreductase activity, acting on paired donors, with incorporation or…	GO:0006082//organic acid metabolic process;GO:0006790//sulfur compound metabolic process;GO:0008150//biological_process;GO:0008152//metabolic process;GO:0009056//catabolic process;GO:0009987//cellular process;GO:0016054//organic acid catabolic process;GO:0019694//alkanesulfonate metabolic process;GO:0044237//cellular metabolic process;GO:0044248//cellular catabolic process;GO:0044273//sulfur comp…
ncbi_3641891	680	811	2128	2245	54.406	58.298	170.119	173.988	56.352	172.054	1.61032	1.78e-14	3.17e-12	AAEL010189	SLP3	Plasma membrane protein implicated in stress response; similar to stomatin mechanoreception proteins; overexpression induces apoptotic-like cell death; absent from hyphal cells; induced by Rgt1; rat catheter and Spider biofilm induced	XP_716431.1 hypothetical protein CAALFM_CR08990CA [Candida albicans SC5314]	-	-	-	-	GO:0030288//outer membrane-bounded periplasmic space	GO:0003674//molecular_function	GO:0045861//negative regulation of proteolysis
ncbi_3640195	816	834	2443	2387	87.091	80.052	260.695	246.892	83.5715	253.793	1.60257	4.91e-16	1.1e-13	RPS4	RPS42	Predicted ribosomal protein S4, component of the small ribosomal subunit; has paralog RPS41	XP_019330612.1 ribosomal 40S subunit protein S4A [Candida albicans SC5314]	Genetic Information Processing	Translation	ko03010//Ribosome	K02987	-	GO:0003723//RNA binding	-
ncbi_3634868	227	265	813	609	11.283	11.834	40.377	29.321	11.5585	34.849	1.59216	4.14e-11	5.22e-09	DBP3	DBP3	Putative ATP-dependent DEAD-box RNA helicase; Hap43-induced; repressed by prostaglandins; Spider biofilm induced	KGT71456.1 ATP-dependent RNA helicase DBP3 [Candida albicans 12C]	-	-	-	-	GO:0005575//cellular_component;GO:0005622//intracellular;GO:0005623//cell;GO:0005634//nucleus;GO:0005658//alpha DNA polymerase:primase complex;GO:0005730//nucleolus;GO:0005737//cytoplasm;GO:0005829//cytosol;GO:0009380//excinuclease repair complex;GO:0016020//membrane;GO:0016021//integral component of membrane;GO:0016592//mediator complex;GO:0030684//preribosome;GO:0030687//preribosome, large subu…	GO:0000166//nucleotide binding;GO:0003674//molecular_function;GO:0003676//nucleic acid binding;GO:0003688//DNA replication origin binding;GO:0003690//double-stranded DNA binding;GO:0003712//transcription cofactor activity;GO:0003723//RNA binding;GO:0003724//RNA helicase activity;GO:0003824//catalytic activity;GO:0004003//ATP-dependent DNA helicase activity;GO:0004004//ATP-dependent RNA helicase a…	GO:0000027//ribosomal large subunit assembly;GO:0000460//maturation of 5.8S rRNA;GO:0000463//maturation of LSU-rRNA from tricistronic rRNA transcript (SSU-rRNA, 5.8S rRNA, LSU-rRNA);GO:0000464//endonucleolytic cleavage in ITS1 upstream of 5.8S rRNA from tricistronic rRNA transcript (SSU-rRNA, 5.8S rRNA, LSU-rRNA);GO:0000466//maturation of 5.8S rRNA from tricistronic rRNA transcript (SSU-rRNA, 5.8…
ncbi_3644402	4403	5286	13373	14619	320.338	345.524	972.142	1030.25	332.931	1001.19	1.58843	2.36e-15	4.77e-13	--	ASR1	Heat shock protein; transcript regulated by cAMP, osmotic stress, ciclopirox olamine, ketoconazole; repressed by Cyr1, Ras1; colony morphology-related regulated by Ssn6; stationary phase enriched; Hap43-induced; Spider biofilm induced	XP_713949.2 Asr1p [Candida albicans SC5314]	-	-	-	-	-	-	-
ncbi_3646427	3262	3198	10377	7697	271.028	238.726	861.476	619.463	254.877	740.47	1.53864	2.08e-15	4.34e-13	vrdA	CSH1	Aldo-keto reductase; role in fibronectin adhesion, cell surface hydrophobicity; regulated by temperature, growth phase, benomyl, macrophage interaction; azole resistance associated; Spider biofilm induced; rat catheter biofilm repressed	XP_711971.1 Csh1p [Candida albicans SC5314]	-	-	-	-	-	GO:0047834//D-threo-aldose 1-dehydrogenase activity	-
ncbi_3646501	74	82	241	187	8.15	8.114	26.519	19.949	8.132	23.234	1.51456	3.34e-06	0.000160584	PCL2	PCL2	Cyclin homolog; reduced expression observed upon depletion of Cln3; farnesol regulated; periodic mRNA expression, peak at cell-cycle G1/S phase; Hap43-induced; rat catheter biofilm repressed	XP_711891.1 cyclin [Candida albicans SC5314]	Cellular Processes	Cell growth and death	ko04111//Cell cycle - yeast	K06657	-	GO:0019901//protein kinase binding	GO:0000079//regulation of cyclin-dependent protein serine/threonine kinase activity
ncbi_3639546	188	231	648	498	6.526	7.204	22.476	16.745	6.865	19.6105	1.51429	1.93e-09	2.05e-07	HAK1	HAK1	Putative potassium transporter; similar to Schwanniomyces occidentalis Hak1p; amphotericin B induced; induced upon phagocytosis by macrophage; Hap43-repressed; rat catheter biofilm repressed	XP_718838.2 Hak1p [Candida albicans SC5314]	-	-	-	-	GO:0005634//nucleus;GO:0016020//membrane	GO:0015079//potassium ion transmembrane transporter activity	GO:0006813//potassium ion transport;GO:0071805//potassium ion transmembrane transport
ncbi_3644681	102	177	436	301	9.211	14.36	39.338	26.328	11.7855	32.833	1.47813	4.12e-06	0.000190235	RPP1	RPP1	Putative ortholog of S. cerevisiae Rpp1; subunit of both RNase MRP and nuclear RNase P; rat catheter and Spider biofilm induced	XP_713634.1 RNA-binding RNA processing protein [Candida albicans SC5314]	Genetic Information Processing;Genetic Information Processing	Translation;Translation	ko03013//Nucleocytoplasmic transport;ko03008//Ribosome biogenesis in eukaryotes	K03539;K03539	GO:0000172//ribonuclease MRP complex;GO:0005575//cellular_component;GO:0005622//intracellular;GO:0005623//cell;GO:0005634//nucleus;GO:0005654//nucleoplasm;GO:0005655//nucleolar ribonuclease P complex;GO:0005730//nucleolus;GO:0005732//small nucleolar ribonucleoprotein complex;GO:0005737//cytoplasm;GO:0005829//cytosol;GO:0030677//ribonuclease P complex;GO:0030681//multimeric ribonuclease P complex;…	GO:0000049//tRNA binding;GO:0003674//molecular_function;GO:0003676//nucleic acid binding;GO:0003723//RNA binding;GO:0003824//catalytic activity;GO:0004518//nuclease activity;GO:0004519//endonuclease activity;GO:0004521//endoribonuclease activity;GO:0004526//ribonuclease P activity;GO:0004540//ribonuclease activity;GO:0004549//tRNA-specific ribonuclease activity;GO:0005488//binding;GO:0016787//hyd…	GO:0000294//nuclear-transcribed mRNA catabolic process, endonucleolytic cleavage-dependent decay;GO:0000447//endonucleolytic cleavage in ITS1 to separate SSU-rRNA from 5.8S rRNA and LSU-rRNA from tricistronic rRNA transcript (SSU-rRNA, 5.8S rRNA, LSU-rRNA);GO:0000460//maturation of 5.8S rRNA;GO:0000462//maturation of SSU-rRNA from tricistronic rRNA transcript (SSU-rRNA, 5.8S rRNA, LSU-rRNA);GO:00…
ncbi_3644032	330	434	1070	962	37.826	44.695	122.548	106.812	41.2605	114.68	1.47478	1.1e-10	1.36e-08	--	orf19.94	Protein of unknown function; Spider biofilm induced	XP_714303.1 hypothetical protein CAALFM_C600930CA [Candida albicans SC5314]	-	-	-	-	-	GO:0008565//protein transporter activity	GO:0006886//intracellular protein transport;GO:0015031//protein transport
ncbi_3635654	45	60	169	107	1.614	1.933	6.056	3.717	1.7735	4.8865	1.4622	0.00027528	0.00576563	BMT9	BMT9	Beta-mannosyltransferase, 9-gene family that includes characterized genes BMT1, BMT2, BMT3, and BMT4 with roles in beta-1,2-mannosylation of cell wall phosphopeptidomannan; regulated by Sef1, Sfu1, Hap43; rat catheter biofilm repressed	XP_722742.2 Bmt9p [Candida albicans SC5314]	-	-	-	-	GO:0005575//cellular_component;GO:0016020//membrane;GO:0016021//integral component of membrane;GO:0031224//intrinsic component of membrane;GO:0044425//membrane part	GO:0000030//mannosyltransferase activity;GO:0003674//molecular_function;GO:0003824//catalytic activity;GO:0009378//four-way junction helicase activity;GO:0016740//transferase activity;GO:0016757//transferase activity, transferring glycosyl groups;GO:0016758//transferase activity, transferring hexosyl groups	GO:0006281//DNA repair;GO:0006310//DNA recombination;GO:0008150//biological_process;GO:0008152//metabolic process;GO:0009987//cellular process;GO:0016043//cellular component organization;GO:0045229//external encapsulating structure organization;GO:0070085//glycosylation;GO:0071554//cell wall organization or biogenesis;GO:0071555//cell wall organization;GO:0071840//cellular component organization …
ncbi_3646671	43	66	170	113	3.834	5.287	15.144	9.758	4.5605	12.451	1.449	0.000318903	0.00639178	--	orf19.2784	Ortholog of C. dubliniensis CD36 : Cd36_07090, C. auris B8441 : B9J08_003145, Candida tenuis NRRL Y-1498 : cten_CGOB_00237 and Debaryomyces hansenii CBS767 : DEHA2F25542g	XP_711726.2 hypothetical protein CAALFM_C107610CA [Candida albicans SC5314]	-	-	-	-	GO:0005634//nucleus;GO:0097196//Shu complex	-	GO:0000725//recombinational repair
ncbi_3638446	134	164	444	335	10.282	11.306	34.04	24.899	10.794	29.4695	1.44899	1.59e-07	1.13e-05	--	orf19.6793	Protein of unknown function; Sef1, Sfu1, and Hap43 regulated; rat catheter and Spider biofilm induced	KHC79245.1 Hap43p-induced protein [Candida albicans SC5314]	-	-	-	-	-	-	-
ncbi_3643180	53	53	148	129	11.362	10.208	31.701	26.787	10.785	29.244	1.43911	0.000121488	0.0030262	KRE1	KRE1	Cell wall glycoprotein; beta glucan synthesis; increases glucan content in S. cerevisiae kre1, complements killer toxin sensitivity; caspofungin induced; Spider/rat catheter/flow model biofilm induced; Bcr1-repressed in RPMI a/a biofilms	XP_715153.1 Kre1p [Candida albicans SC5314]	-	-	-	-	GO:0005575//cellular_component;GO:0005576//extracellular region;GO:0005618//cell wall;GO:0005623//cell;GO:0005886//plasma membrane;GO:0016020//membrane;GO:0030312//external encapsulating structure;GO:0031224//intrinsic component of membrane;GO:0031225//anchored component of membrane;GO:0044425//membrane part;GO:0044464//cell part;GO:0071944//cell periphery	-	GO:0000271//polysaccharide biosynthetic process;GO:0005975//carbohydrate metabolic process;GO:0005976//polysaccharide metabolic process;GO:0006073//cellular glucan metabolic process;GO:0006077//(1->6)-beta-D-glucan metabolic process;GO:0006078//(1->6)-beta-D-glucan biosynthetic process;GO:0008150//biological_process;GO:0008152//metabolic process;GO:0009058//biosynthetic process;GO:0009059//macrom…
ncbi_3634802	79	73	209	187	11.093	9.209	29.323	25.434	10.151	27.3785	1.43142	1.35e-05	0.000526104	--	orf19.4793	Putative ribosome-associated protein; ortholog of S. cerevisiae Tma16; Hap43-induced gene; Spider biofilm induced	KGQ90592.1 translation machinery-associated protein 16 [Candida albicans P94015]	-	-	-	-	GO:0005575//cellular_component;GO:0005622//intracellular;GO:0005623//cell;GO:0005634//nucleus;GO:0043226//organelle;GO:0043227//membrane-bounded organelle;GO:0043229//intracellular organelle;GO:0043231//intracellular membrane-bounded organelle;GO:0044424//intracellular part;GO:0044464//cell part	GO:0003674//molecular_function	GO:0008150//biological_process;GO:0009847//spore germination
ncbi_30514993	31	45	113	82	10.489	13.68	38.202	26.875	12.0845	32.5385	1.42899	0.00146645	0.0200824	RPS27A	RPS27A	Ribosomal protein S27; rat catheter and Spider biofilm induced	XP_002417189.1 40S ribosomal protein S27 [Candida dubliniensis CD36]	Genetic Information Processing	Translation	ko03010//Ribosome	K02978	GO:0005840//ribosome	GO:0003676//nucleic acid binding;GO:0003735//structural constituent of ribosome;GO:0008270//zinc ion binding	GO:0006351//transcription, DNA-templated;GO:0006412//translation
ncbi_3644010	1622	1980	4149	5033	281.179	308.381	718.648	845.128	294.78	781.888	1.40732	1.8e-10	2.1e-08	HYR1	orf19.86	Putative glutathione peroxidase; induced by peroxide, exposure to neutrophils and macrophage blood fractions; repressed during infection of macrophages; Spider biofilm induced; flow model biofilm repressed	XP_714295.1 peroxiredoxin [Candida albicans SC5314]	-	-	-	-	-	GO:0004602//glutathione peroxidase activity;GO:0016209//antioxidant activity;GO:0016491//oxidoreductase activity	GO:0006979//response to oxidative stress;GO:0055114//oxidation-reduction process
ncbi_3647679	46	79	144	165	11.638	17.957	36.402	40.436	14.7975	38.419	1.37647	0.000410924	0.00782176	--	orf19.1830	Protein of unknown function; Hap43-induced; rat catheter and Spider biofilm induced	KGU34421.1 Hap43p-induced protein [Candida albicans P75063]	-	-	-	-	-	-	-
ncbi_3638966	50	54	137	121	2.695	2.615	7.379	6.318	2.655	6.8485	1.36708	0.000358104	0.00706059	INO1	INO1	Inositol-1-phosphate synthase; antigenic in human; repressed by farnesol in biofilm or by caspofungin; upstream inositol/choline regulatory element; glycosylation predicted; rat catheter, flow model induced; Spider biofilm repressed	XP_719347.1 inositol-3-phosphate synthase [Candida albicans SC5314]	Metabolism;Metabolism;Metabolism	Global and overview maps;Global and overview maps;Carbohydrate metabolism	ko01100//Metabolic pathways;ko01110//Biosynthesis of secondary metabolites;ko00562//Inositol phosphate metabolism	K01858;K01858;K01858	GO:0005575//cellular_component;GO:0005618//cell wall;GO:0005622//intracellular;GO:0005623//cell;GO:0005737//cytoplasm;GO:0005829//cytosol;GO:0009277//fungal-type cell wall;GO:0009986//cell surface;GO:0030312//external encapsulating structure;GO:0030446//hyphal cell wall;GO:0044424//intracellular part;GO:0044444//cytoplasmic part;GO:0044464//cell part;GO:0071944//cell periphery	GO:0003674//molecular_function;GO:0003824//catalytic activity;GO:0004512//inositol-3-phosphate synthase activity;GO:0016853//isomerase activity;GO:0016872//intramolecular lyase activity	GO:0005975//carbohydrate metabolic process;GO:0006020//inositol metabolic process;GO:0006021//inositol biosynthetic process;GO:0006066//alcohol metabolic process;GO:0006629//lipid metabolic process;GO:0006644//phospholipid metabolic process;GO:0006793//phosphorus metabolic process;GO:0006796//phosphate-containing compound metabolic process;GO:0008150//biological_process;GO:0008152//metabolic proc…
ncbi_3637884	39	89	134	174	7.158	14.677	24.575	30.936	10.9175	27.7555	1.34613	0.00166484	0.0217182	--	orf19.2770	Ortholog of C. dubliniensis CD36 : Cd36_42220, C. parapsilosis CDC317 : CPAR2_500340, Debaryomyces hansenii CBS767 : DEHA2G17754g and Pichia stipitis Pignal : PICST_31424	XP_720520.1 hypothetical protein CAALFM_C402330CA [Candida albicans SC5314]	-	-	-	-	-	GO:0043743//LPPG:FO 2-phospho-L-lactate transferase activity	-
ncbi_3639349	158	139	379	345	5.645	4.462	13.53	11.94	5.0535	12.735	1.33344	1.07e-06	6.21e-05	HGC1	HGC1	Hypha-specific G1 cyclin-related protein involved in regulation of morphogenesis, biofilm formation; Cdc28-Hgc1 maintains Cdc11 S394 phosphorylation during hyphal growth; required for virulence in mice; regulated by Nrg1, Tup1, farnesol	KHC90168.1 hypothetical protein I503_00072 [Candida albicans SC5314]	-	-	-	-	GO:0005575//cellular_component;GO:0005622//intracellular;GO:0005623//cell;GO:0044464//cell part	-	GO:0000079//regulation of cyclin-dependent protein serine/threonine kinase activity;GO:0001932//regulation of protein phosphorylation;GO:0002831//regulation of response to biotic stimulus;GO:0002833//positive regulation of response to biotic stimulus;GO:0007049//cell cycle;GO:0008150//biological_process;GO:0009268//response to pH;GO:0009405//pathogenesis;GO:0009607//response to biotic stimulus;GO…
ncbi_3644682	478	482	1388	936	31.437	28.481	91.212	59.629	29.959	75.4205	1.33197	1e-08	9.45e-07	FPR3	orf19.1030	Putative peptidyl-prolyl cis-trans isomerase	XP_713635.1 peptidylprolyl isomerase [Candida albicans SC5314]	-	-	-	-	GO:0000785//chromatin;GO:0000792//heterochromatin;GO:0005575//cellular_component;GO:0005622//intracellular;GO:0005623//cell;GO:0005634//nucleus;GO:0005694//chromosome;GO:0005730//nucleolus;GO:0031974//membrane-enclosed lumen;GO:0031981//nuclear lumen;GO:0043226//organelle;GO:0043227//membrane-bounded organelle;GO:0043228//non-membrane-bounded organelle;GO:0043229//intracellular organelle;GO:00432…	GO:0000976//transcription regulatory region sequence-specific DNA binding;GO:0000977//RNA polymerase II regulatory region sequence-specific DNA binding;GO:0000978//RNA polymerase II core promoter proximal region sequence-specific DNA binding;GO:0000987//core promoter proximal region sequence-specific DNA binding;GO:0001012//RNA polymerase II regulatory region DNA binding;GO:0001067//regulatory re…	GO:0000412//histone peptidyl-prolyl isomerization;GO:0000413//protein peptidyl-prolyl isomerization;GO:0006325//chromatin organization;GO:0006464//cellular protein modification process;GO:0006807//nitrogen compound metabolic process;GO:0006996//organelle organization;GO:0007154//cell communication;GO:0007165//signal transduction;GO:0008150//biological_process;GO:0008152//metabolic process;GO:0009…
ncbi_3643303	118	138	326	287	8.652	9.091	23.884	20.384	8.8715	22.134	1.31901	3.68e-06	0.000175545	FTR1	FTR2	High-affinity iron permease; probably interacts with ferrous oxidase; regulated by iron level, ciclopirox olamine, amphotericin B, caspofungin; complements S. cerevisiae ftr1 iron transport defect; Hap43-repressed; Spider biofilm induced	XP_715031.1 Ftr2p [Candida albicans SC5314]	-	-	-	-	GO:0016020//membrane;GO:0033573//high-affinity iron permease complex	GO:0005381//iron ion transmembrane transporter activity;GO:0008324//cation transmembrane transporter activity;GO:0016491//oxidoreductase activity;GO:0050660//flavin adenine dinucleotide binding	GO:0006812//cation transport;GO:0034755//iron ion transmembrane transport;GO:0055114//oxidation-reduction process
ncbi_3637378	80	141	234	290	1.8	2.851	5.261	6.321	2.3255	5.791	1.31627	0.000142496	0.00347925	HFM1	orf19.810	Ortholog(s) have DNA helicase activity, heteroduplex DNA loop binding activity	XP_019330767.1 hypothetical protein CAALFM_C204110WA [Candida albicans SC5314]	-	-	-	-	GO:0005575//cellular_component;GO:0005622//intracellular;GO:0005623//cell;GO:0005634//nucleus;GO:0005694//chromosome;GO:0005730//nucleolus;GO:0005737//cytoplasm;GO:0031974//membrane-enclosed lumen;GO:0031981//nuclear lumen;GO:0043226//organelle;GO:0043227//membrane-bounded organelle;GO:0043228//non-membrane-bounded organelle;GO:0043229//intracellular organelle;GO:0043231//intracellular membrane-b…	GO:0000166//nucleotide binding;GO:0003674//molecular_function;GO:0003676//nucleic acid binding;GO:0003677//DNA binding;GO:0003678//DNA helicase activity;GO:0003723//RNA binding;GO:0003724//RNA helicase activity;GO:0003824//catalytic activity;GO:0004003//ATP-dependent DNA helicase activity;GO:0004004//ATP-dependent RNA helicase activity;GO:0004386//helicase activity;GO:0005488//binding;GO:0005524/…	GO:0000003//reproduction;GO:0000280//nuclear division;GO:0000712//resolution of meiotic recombination intermediates;GO:0003006//developmental process involved in reproduction;GO:0006139//nucleobase-containing compound metabolic process;GO:0006259//DNA metabolic process;GO:0006260//DNA replication;GO:0006261//DNA-dependent DNA replication;GO:0006268//DNA unwinding involved in DNA replication;GO:00…
ncbi_3641614	39	62	134	102	3.026	4.321	10.387	7.665	3.6735	9.026	1.29693	0.00195442	0.0245949	GBU1	GBU1	Guanidinobutyrase (Gbase), enzyme involved in metabolism of guanidinobutyrate	KGQ86042.1 agmatinase [Candida albicans P37005]	Metabolism;Metabolism	Global and overview maps;Amino acid metabolism	ko01100//Metabolic pathways;ko00330//Arginine and proline metabolism	K01480;K01480	-	GO:0003674//molecular_function;GO:0003824//catalytic activity;GO:0004053//arginase activity;GO:0005488//binding;GO:0008783//agmatinase activity;GO:0016787//hydrolase activity;GO:0016810//hydrolase activity, acting on carbon-nitrogen (but not peptide) bonds;GO:0016813//hydrolase activity, acting on carbon-nitrogen (but not peptide) bonds, in linear amidines;GO:0030145//manganese ion binding;GO:004…	GO:0006082//organic acid metabolic process;GO:0006520//cellular amino acid metabolic process;GO:0006525//arginine metabolic process;GO:0006527//arginine catabolic process;GO:0006807//nitrogen compound metabolic process;GO:0008150//biological_process;GO:0008152//metabolic process;GO:0008295//spermidine biosynthetic process;GO:0009056//catabolic process;GO:0009063//cellular amino acid catabolic pro…
ncbi_3647536	464	503	1317	953	34.022	33.137	96.488	67.687	33.5795	82.0875	1.28958	9.27e-09	9.05e-07	REI1	REI1	Putative cytoplasmic pre-60S factor; Hap43-induced; repressed by prostaglandins	XP_710870.2 Rei1p [Candida albicans SC5314]	-	-	-	-	GO:0000775//chromosome, centromeric region;GO:0005575//cellular_component;GO:0005622//intracellular;GO:0005623//cell;GO:0005672//transcription factor TFIIA complex;GO:0005737//cytoplasm;GO:0005829//cytosol;GO:0005840//ribosome;GO:0015934//large ribosomal subunit;GO:0016021//integral component of membrane;GO:0022625//cytosolic large ribosomal subunit;GO:0022626//cytosolic ribosome;GO:0030684//prer…	GO:0003674//molecular_function;GO:0003676//nucleic acid binding;GO:0003677//DNA binding;GO:0003682//chromatin binding;GO:0004190//aspartic-type endopeptidase activity;GO:0005488//binding;GO:0008270//zinc ion binding;GO:0043167//ion binding;GO:0043169//cation binding;GO:0043565//sequence-specific DNA binding;GO:0046872//metal ion binding;GO:0046914//transition metal ion binding;GO:0097159//organic…	GO:0000003//reproduction;GO:0000278//mitotic cell cycle;GO:0006367//transcription initiation from RNA polymerase II promoter;GO:0006810//transport;GO:0006913//nucleocytoplasmic transport;GO:0007049//cell cycle;GO:0007114//cell budding;GO:0007117//budding cell bud growth;GO:0008150//biological_process;GO:0009987//cellular process;GO:0016485//protein processing;GO:0019954//asexual reproduction;GO:0…
ncbi_3646424	1279	1328	3549	2578	116.241	108.437	322.282	226.953	112.339	274.618	1.28956	3e-10	3.42e-08	CUZ1	orf19.4474	Ortholog(s) have proteasome binding activity and role in cellular response to arsenic-containing substance, proteasome-mediated ubiquitin-dependent protein catabolic process	XP_711968.2 hypothetical protein CAALFM_C103990WA [Candida albicans SC5314]	-	-	-	-	GO:0000151//ubiquitin ligase complex;GO:0000152//nuclear ubiquitin ligase complex;GO:0005575//cellular_component;GO:0005622//intracellular;GO:0005623//cell;GO:0005634//nucleus;GO:0005680//anaphase-promoting complex;GO:0005737//cytoplasm;GO:0031461//cullin-RING ubiquitin ligase complex;GO:0032991//macromolecular complex;GO:0043226//organelle;GO:0043227//membrane-bounded organelle;GO:0043229//intra…	GO:0003674//molecular_function;GO:0005488//binding;GO:0008270//zinc ion binding;GO:0043167//ion binding;GO:0043169//cation binding;GO:0044877//macromolecular complex binding;GO:0046872//metal ion binding;GO:0046914//transition metal ion binding;GO:0070628//proteasome binding	GO:0006508//proteolysis;GO:0006511//ubiquitin-dependent protein catabolic process;GO:0006807//nitrogen compound metabolic process;GO:0008150//biological_process;GO:0008152//metabolic process;GO:0009056//catabolic process;GO:0009057//macromolecule catabolic process;GO:0009987//cellular process;GO:0010498//proteasomal protein catabolic process;GO:0019538//protein metabolic process;GO:0019941//modif…
ncbi_3647591	77	50	187	114	2.647	1.544	6.423	3.796	2.0955	5.1095	1.28589	0.00138049	0.0191216	RNR1	RNR3	Putative ribonucleotide reductase large subunit; transcript induced in low iron; rat catheter and Spider biofilm induced	XP_710800.2 Rnr3p [Candida albicans SC5314]	Metabolism;Metabolism;Metabolism;Metabolism	Global and overview maps;Nucleotide metabolism;Nucleotide metabolism;Metabolism of other amino acids	ko01100//Metabolic pathways;ko00230//Purine metabolism;ko00240//Pyrimidine metabolism;ko00480//Glutathione metabolism	K10807;K10807;K10807;K10807	GO:0005971//ribonucleoside-diphosphate reductase complex	GO:0004748//ribonucleoside-diphosphate reductase activity, thioredoxin disulfide as acceptor;GO:0005524//ATP binding	GO:0006260//DNA replication;GO:0009265//2'-deoxyribonucleotide biosynthetic process;GO:0055114//oxidation-reduction process
ncbi_3646423	95	92	274	163	15.159	13.189	43.684	25.193	14.174	34.4385	1.28078	0.000199295	0.00451105	SPC19	SPC19	Essential subunit of the Dam1 (DASH) complex, which acts in chromosome segregation by coupling kinetochores to spindle microtubules	XP_711967.2 Spc19p [Candida albicans SC5314]	-	-	-	-	GO:0000228//nuclear chromosome;GO:0000775//chromosome, centromeric region;GO:0000776//kinetochore;GO:0000777//condensed chromosome kinetochore;GO:0000778//condensed nuclear chromosome kinetochore;GO:0000779//condensed chromosome, centromeric region;GO:0000780//condensed nuclear chromosome, centromeric region;GO:0000793//condensed chromosome;GO:0000794//condensed nuclear chromosome;GO:0000818//nuc…	GO:0001216//bacterial-type RNA polymerase transcriptional activator activity, sequence-specific DNA binding;GO:0003674//molecular_function;GO:0005488//binding;GO:0005515//protein binding;GO:0008017//microtubule binding;GO:0008092//cytoskeletal protein binding;GO:0008565//protein transporter activity;GO:0015631//tubulin binding;GO:0016987//sigma factor activity;GO:0051010//microtubule plus-end bin…	GO:0000003//reproduction;GO:0000070//mitotic sister chromatid segregation;GO:0000226//microtubule cytoskeleton organization;GO:0000278//mitotic cell cycle;GO:0000280//nuclear division;GO:0000819//sister chromatid segregation;GO:0006323//DNA packaging;GO:0006996//organelle organization;GO:0007010//cytoskeleton organization;GO:0007017//microtubule-based process;GO:0007049//cell cycle;GO:0007051//sp…
ncbi_3639838	216	328	743	502	23.976	32.711	82.406	53.975	28.3435	68.1905	1.26655	6.36e-06	0.000270927	uck2a	orf19.2487	Protein with a predicted phosphoribulokinase/uridine kinase domain; Spider biofilm induced	KGR03764.1 hypothetical protein MG1_00550 [Candida albicans GC75]	Metabolism;Metabolism	Global and overview maps;Nucleotide metabolism	ko01100//Metabolic pathways;ko00240//Pyrimidine metabolism	K00876;K00876	GO:0005575//cellular_component;GO:0005622//intracellular;GO:0005623//cell;GO:0005634//nucleus;GO:0005737//cytoplasm;GO:0005829//cytosol;GO:0043226//organelle;GO:0043227//membrane-bounded organelle;GO:0043229//intracellular organelle;GO:0043231//intracellular membrane-bounded organelle;GO:0044424//intracellular part;GO:0044444//cytoplasmic part;GO:0044464//cell part	GO:0000166//nucleotide binding;GO:0003674//molecular_function;GO:0003824//catalytic activity;GO:0004849//uridine kinase activity;GO:0005488//binding;GO:0005524//ATP binding;GO:0008144//drug binding;GO:0016301//kinase activity;GO:0016740//transferase activity;GO:0016772//transferase activity, transferring phosphorus-containing groups;GO:0017076//purine nucleotide binding;GO:0019205//nucleobase-con…	GO:0006139//nucleobase-containing compound metabolic process;GO:0006206//pyrimidine nucleobase metabolic process;GO:0006213//pyrimidine nucleoside metabolic process;GO:0006220//pyrimidine nucleotide metabolic process;GO:0006221//pyrimidine nucleotide biosynthetic process;GO:0006222//UMP biosynthetic process;GO:0006241//CTP biosynthetic process;GO:0006725//cellular aromatic compound metabolic proc…
ncbi_3639877	666	518	1628	1084	56.849	39.726	138.85	89.628	48.2875	114.239	1.24233	5.34e-07	3.4e-05	PIR	PRN4	Protein with similarity to pirins; induced by benomyl treatment; flow model biofilm repressed	XP_718483.1 Prn4p [Candida albicans SC5314]	-	-	-	-	-	GO:0003700//transcription factor activity, sequence-specific DNA binding	-
ncbi_3641878	41	36	87	89	9.361	7.385	19.847	19.683	8.373	19.765	1.23913	0.00511497	0.0470531	--	orf19.7283	Protein of unknown function; rat catheter and Spider biofilm induced	XP_716418.1 hypothetical protein CAALFM_CR08880CA [Candida albicans SC5314]	-	-	-	-	-	-	-
ncbi_3644542	328	305	767	655	25.658	21.436	59.95	49.632	23.547	54.791	1.2184	1.53e-07	1.1e-05	KRR1	KRR1	Putative nucleolar protein; repressed benomyl treatment or in an azole-resistant strain that overexpresses MDR1; F-12/CO2 early biofilm induced	XP_713795.1 ribosome biosynthesis protein [Candida albicans SC5314]	-	-	-	-	-	GO:0003723//RNA binding	-
ncbi_3642478	113	186	328	333	16.027	23.702	46.483	45.75	19.8645	46.1165	1.21509	8.83e-05	0.00236568	mrpl58	orf19.425	Ortholog(s) have mitochondrial large ribosomal subunit localization	KGQ98927.1 peptidyl-tRNA hydrolase ICT1 [Candida albicans P37005]	-	-	-	-	GO:0000313//organellar ribosome;GO:0000315//organellar large ribosomal subunit;GO:0005575//cellular_component;GO:0005622//intracellular;GO:0005623//cell;GO:0005737//cytoplasm;GO:0005739//mitochondrion;GO:0005740//mitochondrial envelope;GO:0005743//mitochondrial inner membrane;GO:0005759//mitochondrial matrix;GO:0005761//mitochondrial ribosome;GO:0005762//mitochondrial large ribosomal subunit;GO:0…	GO:0003674//molecular_function;GO:0003676//nucleic acid binding;GO:0003723//RNA binding;GO:0003747//translation release factor activity;GO:0003824//catalytic activity;GO:0004045//aminoacyl-tRNA hydrolase activity;GO:0005488//binding;GO:0008079//translation termination factor activity;GO:0008135//translation factor activity, RNA binding;GO:0016150//translation release factor activity, codon nonspe…	GO:0000003//reproduction;GO:0006412//translation;GO:0006414//translational elongation;GO:0006415//translational termination;GO:0006417//regulation of translation;GO:0006518//peptide metabolic process;GO:0006807//nitrogen compound metabolic process;GO:0007049//cell cycle;GO:0008150//biological_process;GO:0008152//metabolic process;GO:0009058//biosynthetic process;GO:0009059//macromolecule biosynth…
ncbi_3647737	134	181	326	364	9.877	11.986	24.009	25.989	10.9315	24.999	1.19338	4.16e-05	0.00129783	--	orf19.1287	Protein of unknown function; flow model biofilm induced; Spider biofilm induced	KHC32412.1 Biofilm-induced protein [Candida albicans P76055]	-	-	-	-	-	GO:0000981//RNA polymerase II transcription factor activity, sequence-specific DNA binding;GO:0008270//zinc ion binding	GO:0006355//regulation of transcription, DNA-templated
ncbi_3636849	412	533	965	1107	65.369	75.979	152.983	170.132	70.674	161.558	1.1928	7.43e-07	4.54e-05	BUD20	orf19.2934	Similar to S. cerevisiae Bud20; predicted role in cellular bud site selection; rat catheter and Spider biofilm induced	KGQ98640.1 bud site selection protein 20 [Candida albicans P37005]	-	-	-	-	GO:0005575//cellular_component;GO:0005622//intracellular;GO:0005623//cell;GO:0005634//nucleus;GO:0005730//nucleolus;GO:0005737//cytoplasm;GO:0005783//endoplasmic reticulum;GO:0012505//endomembrane system;GO:0030684//preribosome;GO:0030687//preribosome, large subunit precursor;GO:0031974//membrane-enclosed lumen;GO:0031981//nuclear lumen;GO:0032991//macromolecular complex;GO:0043226//organelle;GO:…	GO:0000981//RNA polymerase II transcription factor activity, sequence-specific DNA binding;GO:0003674//molecular_function;GO:0003676//nucleic acid binding;GO:0003677//DNA binding;GO:0003700//transcription factor activity, sequence-specific DNA binding;GO:0005488//binding;GO:0008270//zinc ion binding;GO:0043021//ribonucleoprotein complex binding;GO:0043023//ribosomal large subunit binding;GO:00431…	GO:0000054//ribosomal subunit export from nucleus;GO:0000055//ribosomal large subunit export from nucleus;GO:0000278//mitotic cell cycle;GO:0000281//mitotic cytokinesis;GO:0000282//cellular bud site selection;GO:0000910//cytokinesis;GO:0006139//nucleobase-containing compound metabolic process;GO:0006351//transcription, DNA-templated;GO:0006355//regulation of transcription, DNA-templated;GO:000635…
ncbi_3645880	206	201	423	476	31.787	27.865	65.216	71.145	29.826	68.1805	1.19279	6.25e-06	0.000270182	NIP7	NIP7	Putative nucleolar protein with role in ribosomal assembly; hyphal-induced; Hap43-induced; Spider biofilm induced	KHC64165.1 60S ribosome subunit biogenesis protein NIP7 [Candida albicans P75016]	-	-	-	-	GO:0005575//cellular_component;GO:0005622//intracellular;GO:0005623//cell;GO:0005634//nucleus;GO:0005730//nucleolus;GO:0005737//cytoplasm;GO:0005829//cytosol;GO:0030684//preribosome;GO:0030687//preribosome, large subunit precursor;GO:0031974//membrane-enclosed lumen;GO:0031981//nuclear lumen;GO:0032991//macromolecular complex;GO:0043226//organelle;GO:0043227//membrane-bounded organelle;GO:0043228…	GO:0003674//molecular_function;GO:0003676//nucleic acid binding;GO:0003723//RNA binding;GO:0005488//binding;GO:0097159//organic cyclic compound binding;GO:1901363//heterocyclic compound binding	GO:0000463//maturation of LSU-rRNA from tricistronic rRNA transcript (SSU-rRNA, 5.8S rRNA, LSU-rRNA);GO:0000470//maturation of LSU-rRNA;GO:0006139//nucleobase-containing compound metabolic process;GO:0006364//rRNA processing;GO:0006396//RNA processing;GO:0006725//cellular aromatic compound metabolic process;GO:0006807//nitrogen compound metabolic process;GO:0006996//organelle organization;GO:0008…
ncbi_30514981	82	68	136	196	17.579	13.097	29.131	40.7	15.338	34.9155	1.18676	0.00142897	0.0197478	RPS22A	orf19.3061.1	Ortholog of S. cerevisiae Rps22Ap and Rps22Bp; gene contains 5' UTR intron	XP_002417265.1 40S ribosomal protein S22 [Candida dubliniensis CD36]	Genetic Information Processing	Translation	ko03010//Ribosome	K02957	GO:0005575//cellular_component;GO:0005622//intracellular;GO:0005623//cell;GO:0005737//cytoplasm;GO:0005840//ribosome;GO:0032991//macromolecular complex;GO:0043226//organelle;GO:0043228//non-membrane-bounded organelle;GO:0043229//intracellular organelle;GO:0043232//intracellular non-membrane-bounded organelle;GO:0044424//intracellular part;GO:0044444//cytoplasmic part;GO:0044464//cell part;GO:1990…	GO:0003674//molecular_function;GO:0003735//structural constituent of ribosome;GO:0005198//structural molecule activity	GO:0006412//translation;GO:0006518//peptide metabolic process;GO:0006807//nitrogen compound metabolic process;GO:0008150//biological_process;GO:0008152//metabolic process;GO:0009058//biosynthetic process;GO:0009059//macromolecule biosynthetic process;GO:0009987//cellular process;GO:0010467//gene expression;GO:0019538//protein metabolic process;GO:0034641//cellular nitrogen compound metabolic proc…
ncbi_3636619	70	74	194	120	5.119	4.862	14.176	8.501	4.9905	11.3385	1.18397	0.00159554	0.0210262	--	orf19.1610	Putative protein of unknown function, transcription is activated in the presence of elevated CO2	XP_721689.2 hypothetical protein CAALFM_C302340WA [Candida albicans SC5314]	-	-	-	-	-	-	-
ncbi_3646656	86	111	249	178	3.251	3.769	9.404	6.517	3.51	7.9605	1.18139	0.00038062	0.00738428	URB1	orf19.2778	Protein of unknown function; transcript is upregulated in clinical isolates from HIV+ patients with oral candidiasis	XP_711720.2 hypothetical protein CAALFM_C107660WA [Candida albicans SC5314]	-	-	-	-	-	-	-
ncbi_3636135	138	158	347	290	11.852	12.191	29.776	24.125	12.0215	26.9505	1.1647	3.32e-05	0.00109169	DIM1	DIM1	Putative 18S rRNA dimethylase; predicted role in rRNA modification and processing; Hap43-induced; likely to be essential for growth based on insertional mutagenesis strategy; F-12/CO2 early biofilm induced	XP_722214.1 putative dimethyladenosine transferase [Candida albicans SC5314]	-	-	-	-	GO:0005575//cellular_component;GO:0005622//intracellular;GO:0005623//cell;GO:0005634//nucleus;GO:0005654//nucleoplasm;GO:0005730//nucleolus;GO:0005737//cytoplasm;GO:0005739//mitochondrion;GO:0005759//mitochondrial matrix;GO:0005829//cytosol;GO:0030684//preribosome;GO:0030686//90S preribosome;GO:0030688//preribosome, small subunit precursor;GO:0031974//membrane-enclosed lumen;GO:0031981//nuclear l…	GO:0000179//rRNA (adenine-N6,N6-)-dimethyltransferase activity;GO:0003674//molecular_function;GO:0003676//nucleic acid binding;GO:0003723//RNA binding;GO:0003824//catalytic activity;GO:0004719//protein-L-isoaspartate (D-aspartate) O-methyltransferase activity;GO:0005488//binding;GO:0008168//methyltransferase activity;GO:0008170//N-methyltransferase activity;GO:0008171//O-methyltransferase activit…	GO:0000154//rRNA modification;GO:0000456//dimethylation involved in SSU-rRNA maturation;GO:0000462//maturation of SSU-rRNA from tricistronic rRNA transcript (SSU-rRNA, 5.8S rRNA, LSU-rRNA);GO:0001510//RNA methylation;GO:0001708//cell fate specification;GO:0006139//nucleobase-containing compound metabolic process;GO:0006364//rRNA processing;GO:0006396//RNA processing;GO:0006412//translation;GO:000…
ncbi_3642965	70	72	178	128	13.193	12.192	33.521	23.369	12.6925	28.445	1.1642	0.00135688	0.0188376	--	orf19.3107	Ortholog of C. dubliniensis CD36 : Cd36_46490, Pichia stipitis Pignal : PICST_33598, Candida tropicalis NEW ASSEMBLY : CTRG1_03758 and Spathaspora passalidarum NRRL Y-27907 : spas_CGOB_00037	XP_715416.1 hypothetical protein CAALFM_C407020CA [Candida albicans SC5314]	-	-	-	-	-	-	-
ncbi_3638300	59	62	160	100	3.908	3.689	10.589	6.416	3.7985	8.5025	1.16246	0.00353515	0.0365782	SPBC460.04c	orf19.355	Has domain(s) with predicted oxidoreductase activity	XP_720050.1 hypothetical protein CAALFM_C303570CA [Candida albicans SC5314]	-	-	-	-	-	GO:0016491//oxidoreductase activity	GO:0055114//oxidation-reduction process
ncbi_3644441	1174	1377	2635	2807	215.488	227.081	483.256	499.07	221.285	491.163	1.1503	3.26e-08	2.82e-06	HNT1	HNT1	Histidine triad nucleotide-binding protein; protein level decreases in stationary phase cultures	XP_713946.1 adenosine 5'-monophosphoramidase [Candida albicans SC5314]	-	-	-	-	GO:0000118//histone deacetylase complex;GO:0005575//cellular_component;GO:0005622//intracellular;GO:0005623//cell;GO:0005634//nucleus;GO:0005654//nucleoplasm;GO:0005737//cytoplasm;GO:0005829//cytosol;GO:0005856//cytoskeleton;GO:0005886//plasma membrane;GO:0016020//membrane;GO:0031974//membrane-enclosed lumen;GO:0031981//nuclear lumen;GO:0032991//macromolecular complex;GO:0043226//organelle;GO:004…	GO:0000166//nucleotide binding;GO:0003674//molecular_function;GO:0003824//catalytic activity;GO:0005080//protein kinase C binding;GO:0005488//binding;GO:0005515//protein binding;GO:0016787//hydrolase activity;GO:0016810//hydrolase activity, acting on carbon-nitrogen (but not peptide) bonds;GO:0016811//hydrolase activity, acting on carbon-nitrogen (but not peptide) bonds, in linear amides;GO:00171…	GO:0006012//galactose metabolic process;GO:0006139//nucleobase-containing compound metabolic process;GO:0006163//purine nucleotide metabolic process;GO:0006195//purine nucleotide catabolic process;GO:0006351//transcription, DNA-templated;GO:0006355//regulation of transcription, DNA-templated;GO:0006725//cellular aromatic compound metabolic process;GO:0006753//nucleoside phosphate metabolic proces…
ncbi_3646413	52	77	156	116	2.836	3.772	8.5	6.127	3.304	7.3135	1.14635	0.00346139	0.0360616	ERF2	orf19.4466	Ortholog(s) have palmitoyltransferase activity, protein-cysteine S-palmitoyltransferase activity and role in protein palmitoylation, protein targeting to membrane	XP_711960.2 palmitoyltransferase [Candida albicans SC5314]	-	-	-	-	GO:0000139//Golgi membrane;GO:0002178//palmitoyltransferase complex;GO:0005575//cellular_component;GO:0005622//intracellular;GO:0005623//cell;GO:0005737//cytoplasm;GO:0005783//endoplasmic reticulum;GO:0005789//endoplasmic reticulum membrane;GO:0005794//Golgi apparatus;GO:0005795//Golgi stack;GO:0005938//cell cortex;GO:0012505//endomembrane system;GO:0016020//membrane;GO:0016021//integral componen…	GO:0003674//molecular_function;GO:0003824//catalytic activity;GO:0016409//palmitoyltransferase activity;GO:0016417//S-acyltransferase activity;GO:0016740//transferase activity;GO:0016746//transferase activity, transferring acyl groups;GO:0016747//transferase activity, transferring acyl groups other than amino-acyl groups;GO:0019706//protein-cysteine S-palmitoyltransferase activity;GO:0019707//pro…	GO:0001736//establishment of planar polarity;GO:0001737//establishment of imaginal disc-derived wing hair orientation;GO:0001738//morphogenesis of a polarized epithelium;GO:0002009//morphogenesis of an epithelium;GO:0002165//instar larval or pupal development;GO:0006464//cellular protein modification process;GO:0006497//protein lipidation;GO:0006605//protein targeting;GO:0006612//protein targetin…
ncbi_3646290	367	373	810	758	14.959	13.659	32.988	29.927	14.309	31.4575	1.13648	4.51e-07	2.94e-05	NOP8	NOP8	Ortholog of S. cereviiae Nop8; has a role in ribosomal large subunit biogenesis; rat catheter and Spider biofilm induced	XP_712104.2 Nop8p [Candida albicans SC5314]	-	-	-	-	GO:0005575//cellular_component;GO:0005622//intracellular;GO:0005623//cell;GO:0005634//nucleus;GO:0005730//nucleolus;GO:0031974//membrane-enclosed lumen;GO:0031981//nuclear lumen;GO:0043226//organelle;GO:0043227//membrane-bounded organelle;GO:0043228//non-membrane-bounded organelle;GO:0043229//intracellular organelle;GO:0043231//intracellular membrane-bounded organelle;GO:0043232//intracellular no…	GO:0003674//molecular_function;GO:0003676//nucleic acid binding;GO:0003723//RNA binding;GO:0005488//binding;GO:0097159//organic cyclic compound binding;GO:1901363//heterocyclic compound binding	GO:0000463//maturation of LSU-rRNA from tricistronic rRNA transcript (SSU-rRNA, 5.8S rRNA, LSU-rRNA);GO:0000470//maturation of LSU-rRNA;GO:0006139//nucleobase-containing compound metabolic process;GO:0006364//rRNA processing;GO:0006396//RNA processing;GO:0006725//cellular aromatic compound metabolic process;GO:0006807//nitrogen compound metabolic process;GO:0008150//biological_process;GO:0008152/…
ncbi_3639219	529	681	1296	1251	64.312	74.383	157.428	147.318	69.3475	152.373	1.13569	3.32e-07	2.26e-05	MRT4	MRT4	Putative mRNA turnover protein; Hap43-induced; mutation confers hypersensitivity to tubercidin (7-deazaadenosine); rat catheter biofilm induced	XP_719113.1 Mrt4p [Candida albicans SC5314]	-	-	-	-	GO:0005575//cellular_component;GO:0005622//intracellular;GO:0005623//cell;GO:0005634//nucleus;GO:0005654//nucleoplasm;GO:0005730//nucleolus;GO:0005737//cytoplasm;GO:0005829//cytosol;GO:0005840//ribosome;GO:0015934//large ribosomal subunit;GO:0022625//cytosolic large ribosomal subunit;GO:0022626//cytosolic ribosome;GO:0030684//preribosome;GO:0030687//preribosome, large subunit precursor;GO:0031974…	GO:0003674//molecular_function;GO:0003676//nucleic acid binding;GO:0003723//RNA binding;GO:0003735//structural constituent of ribosome;GO:0005198//structural molecule activity;GO:0005488//binding;GO:0019843//rRNA binding;GO:0070180//large ribosomal subunit rRNA binding;GO:0097159//organic cyclic compound binding;GO:1901363//heterocyclic compound binding	GO:0000027//ribosomal large subunit assembly;GO:0000956//nuclear-transcribed mRNA catabolic process;GO:0002181//cytoplasmic translation;GO:0006139//nucleobase-containing compound metabolic process;GO:0006364//rRNA processing;GO:0006396//RNA processing;GO:0006401//RNA catabolic process;GO:0006402//mRNA catabolic process;GO:0006412//translation;GO:0006518//peptide metabolic process;GO:0006725//cell…
ncbi_3645888	174	194	403	369	10.763	10.782	24.908	22.11	10.7725	23.509	1.12586	1.97e-05	0.000737903	LPE10	orf19.3455	Putative mitochondrial inner membrane magnesium transporter; possibly an essential gene, disruptants not obtained by UAU1 method	Q59S85.2 RecName: Full=Mitochondrial inner membrane magnesium transporter LPE10; Flags: Precursor [Candida albicans SC5314]	-	-	-	-	GO:0005575//cellular_component;GO:0005622//intracellular;GO:0005623//cell;GO:0005737//cytoplasm;GO:0005739//mitochondrion;GO:0005740//mitochondrial envelope;GO:0005743//mitochondrial inner membrane;GO:0016020//membrane;GO:0016021//integral component of membrane;GO:0019866//organelle inner membrane;GO:0031090//organelle membrane;GO:0031224//intrinsic component of membrane;GO:0031966//mitochondrial…	GO:0003674//molecular_function;GO:0005215//transporter activity;GO:0008324//cation transmembrane transporter activity;GO:0015075//ion transmembrane transporter activity;GO:0015095//magnesium ion transmembrane transporter activity;GO:0015318//inorganic solute uptake transmembrane transporter activity;GO:0022857//transmembrane transporter activity;GO:0022890//inorganic cation transmembrane transpor…	GO:0006810//transport;GO:0006811//ion transport;GO:0006812//cation transport;GO:0006839//mitochondrial transport;GO:0008150//biological_process;GO:0015693//magnesium ion transport;GO:0030001//metal ion transport;GO:0034220//ion transmembrane transport;GO:0045016//mitochondrial magnesium ion transport;GO:0051179//localization;GO:0051234//establishment of localization;GO:0055085//transmembrane tran…
ncbi_3634904	496	504	1278	804	16.803	15.34	43.258	26.382	16.0715	34.82	1.11541	6.3e-06	0.000270308	MNN12	MNN12	Predicted alpha-1,3-mannosyltransferase activity with a role in protein glycosylation	XP_723582.2 alpha-1,3-mannosyltransferase [Candida albicans SC5314]	Metabolism;Metabolism;Metabolism	Global and overview maps;Glycan biosynthesis and metabolism;Glycan biosynthesis and metabolism	ko01100//Metabolic pathways;ko00513//Various types of N-glycan biosynthesis;ko00514//Other types of O-glycan biosynthesis	K05538;K05538;K05538	GO:0000139//Golgi membrane;GO:0005575//cellular_component;GO:0005622//intracellular;GO:0005623//cell;GO:0005737//cytoplasm;GO:0005794//Golgi apparatus;GO:0012505//endomembrane system;GO:0016020//membrane;GO:0016021//integral component of membrane;GO:0031090//organelle membrane;GO:0031224//intrinsic component of membrane;GO:0031984//organelle subcompartment;GO:0043226//organelle;GO:0043227//membra…	GO:0003674//molecular_function;GO:0003824//catalytic activity;GO:0016740//transferase activity;GO:0016757//transferase activity, transferring glycosyl groups	GO:0006464//cellular protein modification process;GO:0006486//protein glycosylation;GO:0006807//nitrogen compound metabolic process;GO:0008150//biological_process;GO:0008152//metabolic process;GO:0009058//biosynthetic process;GO:0009059//macromolecule biosynthetic process;GO:0009100//glycoprotein metabolic process;GO:0009101//glycoprotein biosynthetic process;GO:0009987//cellular process;GO:00195…
ncbi_3642016	349	428	851	760	33.451	36.856	81.499	70.56	35.1535	76.0295	1.11289	1.36e-06	7.43e-05	BRX1	CSI2	Putative 66S pre-ribosomal particle component; Hap43-induced; essential for growth; transposon mutation affects filamentous growth; Spider biofilm induced	XP_716301.1 Csi2p [Candida albicans SC5314]	-	-	-	-	GO:0005575//cellular_component;GO:0005622//intracellular;GO:0005623//cell;GO:0005634//nucleus;GO:0005730//nucleolus;GO:0030684//preribosome;GO:0030687//preribosome, large subunit precursor;GO:0031974//membrane-enclosed lumen;GO:0031981//nuclear lumen;GO:0032991//macromolecular complex;GO:0043226//organelle;GO:0043227//membrane-bounded organelle;GO:0043228//non-membrane-bounded organelle;GO:004322…	GO:0003674//molecular_function;GO:0003676//nucleic acid binding;GO:0003723//RNA binding;GO:0005488//binding;GO:0008097//5S rRNA binding;GO:0019843//rRNA binding;GO:0042134//rRNA primary transcript binding;GO:0097159//organic cyclic compound binding;GO:1901363//heterocyclic compound binding	GO:0000027//ribosomal large subunit assembly;GO:0006139//nucleobase-containing compound metabolic process;GO:0006364//rRNA processing;GO:0006396//RNA processing;GO:0006725//cellular aromatic compound metabolic process;GO:0006807//nitrogen compound metabolic process;GO:0006996//organelle organization;GO:0008150//biological_process;GO:0008152//metabolic process;GO:0009987//cellular process;GO:00104…
ncbi_3634780	332	457	949	678	12.532	15.498	35.792	24.789	14.015	30.2905	1.11189	1.24e-05	0.000486773	COS111	orf19.4883	Protein of unknown function; S. cerevisiae ortholog Cos111 confers resistance to the antifungal drug ciclopirox olamine; constitutive expression independent of MTL or white-opaque status; Spider biofilm induced	Q5APS5.1 RecName: Full=F-box protein COS111 [Candida albicans SC5314]	-	-	-	-	GO:0005575//cellular_component;GO:0005622//intracellular;GO:0005623//cell;GO:0005737//cytoplasm;GO:0005739//mitochondrion;GO:0043226//organelle;GO:0043227//membrane-bounded organelle;GO:0043229//intracellular organelle;GO:0043231//intracellular membrane-bounded organelle;GO:0044424//intracellular part;GO:0044444//cytoplasmic part;GO:0044464//cell part	GO:0003674//molecular_function;GO:0005515//protein binding	GO:0007154//cell communication;GO:0007165//signal transduction;GO:0008150//biological_process;GO:0009987//cellular process;GO:0023052//signaling;GO:0050789//regulation of biological process;GO:0050794//regulation of cellular process;GO:0050896//response to stimulus;GO:0051716//cellular response to stimulus;GO:0065007//biological regulation
ncbi_3647671	107	96	246	177	5.217	4.205	11.984	8.359	4.711	10.1715	1.11043	0.000685826	0.0113734	GPT1	GPT1	GABA/polyamine transporter; 9 to 11 membrane spanning segments; complements GABA uptake defect of an S. cerevisiae uga4 put4 gap1 triple mutant; complements growth of an S. cerevisiae spe1 mutant under polyamine limitation	XP_710732.2 Gpt1p [Candida albicans SC5314]	-	-	-	-	GO:0005575//cellular_component;GO:0005623//cell;GO:0005886//plasma membrane;GO:0005887//integral component of plasma membrane;GO:0016020//membrane;GO:0016021//integral component of membrane;GO:0031224//intrinsic component of membrane;GO:0031226//intrinsic component of plasma membrane;GO:0044425//membrane part;GO:0044459//plasma membrane part;GO:0044464//cell part;GO:0071944//cell periphery	GO:0003674//molecular_function;GO:0005215//transporter activity;GO:0005342//organic acid transmembrane transporter activity;GO:0008509//anion transmembrane transporter activity;GO:0008514//organic anion transmembrane transporter activity;GO:0015075//ion transmembrane transporter activity;GO:0015171//amino acid transmembrane transporter activity;GO:0015179//L-amino acid transmembrane transporter a…	GO:0003333//amino acid transmembrane transport;GO:0006810//transport;GO:0006811//ion transport;GO:0006820//anion transport;GO:0006865//amino acid transport;GO:0008150//biological_process;GO:0015711//organic anion transport;GO:0015807//L-amino acid transport;GO:0015849//organic acid transport;GO:0034220//ion transmembrane transport;GO:0046942//carboxylic acid transport;GO:0051179//localization;GO:…
ncbi_3646425	760	898	2043	1384	44.373	47.105	119.182	78.271	45.739	98.7265	1.11001	1.19e-06	6.59e-05	KTR4	KTR4	Mannosyltransferase; induced during cell wall regeneration; fungal-specific (no human or murine homolog); Bcr1-repressed in RPMI a/a biofilms	XP_711969.1 putative mannosyltransferase [Candida albicans SC5314]	-	-	-	-	GO:0000322//storage vacuole;GO:0000323//lytic vacuole;GO:0000324//fungal-type vacuole;GO:0005575//cellular_component;GO:0005622//intracellular;GO:0005623//cell;GO:0005737//cytoplasm;GO:0005773//vacuole;GO:0005794//Golgi apparatus;GO:0012505//endomembrane system;GO:0016020//membrane;GO:0016021//integral component of membrane;GO:0031224//intrinsic component of membrane;GO:0043226//organelle;GO:0043…	GO:0000026//alpha-1,2-mannosyltransferase activity;GO:0000030//mannosyltransferase activity;GO:0003674//molecular_function;GO:0003824//catalytic activity;GO:0016740//transferase activity;GO:0016757//transferase activity, transferring glycosyl groups;GO:0016758//transferase activity, transferring hexosyl groups	GO:0000032//cell wall mannoprotein biosynthetic process;GO:0006056//mannoprotein metabolic process;GO:0006057//mannoprotein biosynthetic process;GO:0006464//cellular protein modification process;GO:0006486//protein glycosylation;GO:0006487//protein N-linked glycosylation;GO:0006493//protein O-linked glycosylation;GO:0006807//nitrogen compound metabolic process;GO:0008150//biological_process;GO:00…
ncbi_3639167	569	666	1462	1087	59.624	62.701	153.074	110.333	61.1625	131.703	1.10657	6.63e-07	4.09e-05	--	orf19.5514	Ortholog of S. pombe SPCC550.08, an N-acetyltransferase; transcript induced during growth in the mouse cecum	XP_719079.2 hypothetical protein CAALFM_C602450WA [Candida albicans SC5314]	-	-	-	-	-	GO:0003674//molecular_function;GO:0003824//catalytic activity;GO:0008080//N-acetyltransferase activity;GO:0016407//acetyltransferase activity;GO:0016410//N-acyltransferase activity;GO:0016740//transferase activity;GO:0016746//transferase activity, transferring acyl groups;GO:0016747//transferase activity, transferring acyl groups other than amino-acyl groups	-
ncbi_3646146	175	187	431	317	8.919	8.563	21.949	15.65	8.741	18.7995	1.10482	5.68e-05	0.00166228	ICL1	ICL1	Isocitrate lyase; glyoxylate cycle enzyme; required for virulence in mice; induced upon phagocytosis by macrophage; farnesol regulated; Pex5-dependent peroxisomal localization; stationary phase enriched; rat catheter, Spider biofilm induced	XP_712232.1 isocitrate lyase 1 [Candida albicans SC5314]	Metabolism;Metabolism;Metabolism;Metabolism	Global and overview maps;Global and overview maps;Global and overview maps;Carbohydrate metabolism	ko01100//Metabolic pathways;ko01110//Biosynthesis of secondary metabolites;ko01200//Carbon metabolism;ko00630//Glyoxylate and dicarboxylate metabolism	K01637;K01637;K01637;K01637	GO:0005575//cellular_component;GO:0005576//extracellular region;GO:0005622//intracellular;GO:0005623//cell;GO:0005737//cytoplasm;GO:0005773//vacuole;GO:0005777//peroxisome;GO:0005782//peroxisomal matrix;GO:0009514//glyoxysome;GO:0031907//microbody lumen;GO:0031974//membrane-enclosed lumen;GO:0042579//microbody;GO:0043226//organelle;GO:0043227//membrane-bounded organelle;GO:0043229//intracellular …	GO:0003674//molecular_function;GO:0003824//catalytic activity;GO:0004451//isocitrate lyase activity;GO:0005488//binding;GO:0008807//carboxyvinyl-carboxyphosphonate phosphorylmutase activity;GO:0016829//lyase activity;GO:0016830//carbon-carbon lyase activity;GO:0016833//oxo-acid-lyase activity;GO:0043167//ion binding;GO:0043169//cation binding;GO:0045182//translation regulator activity;GO:0046421/…	GO:0005975//carbohydrate metabolic process;GO:0006081//cellular aldehyde metabolic process;GO:0006082//organic acid metabolic process;GO:0006083//acetate metabolic process;GO:0006091//generation of precursor metabolites and energy;GO:0006097//glyoxylate cycle;GO:0006099//tricarboxylic acid cycle;GO:0006101//citrate metabolic process;GO:0006417//regulation of translation;GO:0006629//lipid metaboli…
ncbi_3636213	382	355	919	603	19.123	15.966	45.966	29.239	17.5445	37.6025	1.09981	1.37e-05	0.00052741	CYB2	CYB2	Putative cytochrome b2 precursor; induced in high iron; alkaline repressed; colony morphology-related gene regulation by Ssn6; Hap43-repressed; pider biofilm induced	XP_722204.1 Cyb2p [Candida albicans SC5314]	Metabolism;Metabolism	Global and overview maps;Carbohydrate metabolism	ko01100//Metabolic pathways;ko00620//Pyruvate metabolism	K00101;K00101	GO:0005634//nucleus;GO:0005681//spliceosomal complex	GO:0003824//catalytic activity;GO:0003938//IMP dehydrogenase activity;GO:0004452//isopentenyl-diphosphate delta-isomerase activity;GO:0008270//zinc ion binding;GO:0015930//glutamate synthase activity;GO:0016491//oxidoreductase activity;GO:0016638//oxidoreductase activity, acting on the CH-NH2 group of donors;GO:0018580//nitronate monooxygenase activity	GO:0000398//mRNA splicing, via spliceosome;GO:0006537//glutamate biosynthetic process;GO:0008299//isoprenoid biosynthetic process;GO:0009152//purine ribonucleotide biosynthetic process;GO:0055114//oxidation-reduction process
ncbi_3644029	344	333	847	535	32.202	28.007	79.223	48.511	30.1045	63.867	1.08509	3.18e-05	0.00107035	YGR053C	orf19.91	Protein of unknown function; flow model biofilm induced; Hap43-repressed	KGU24984.1 Hap43p-repressed protein [Candida albicans P75063]	-	-	-	-	GO:0005575//cellular_component	GO:0003674//molecular_function;GO:0051539//4 iron, 4 sulfur cluster binding;GO:0070283//radical SAM enzyme activity	GO:0006400//tRNA modification;GO:0008150//biological_process
ncbi_3637768	351	375	797	683	32.64	31.33	74.052	61.521	31.985	67.7865	1.0836	1.95e-06	0.000102831	--	orf19.4264	Protein of unknown function; induced during chlamydospore formation in both C. albicans and C. dubliniensis; flow model biofilm induced	KHC86050.1 Biofilm-induced protein [Candida albicans SC5314]	-	-	-	-	GO:0005575//cellular_component;GO:0005622//intracellular;GO:0005623//cell;GO:0005634//nucleus;GO:0043226//organelle;GO:0043227//membrane-bounded organelle;GO:0043229//intracellular organelle;GO:0043231//intracellular membrane-bounded organelle;GO:0044424//intracellular part;GO:0044464//cell part	GO:0003677//DNA binding	GO:0001654//eye development;GO:0007275//multicellular organism development;GO:0007423//sensory organ development;GO:0007444//imaginal disc development;GO:0008150//biological_process;GO:0009888//tissue development;GO:0022416//chaeta development;GO:0032501//multicellular organismal process;GO:0032502//developmental process;GO:0035220//wing disc development;GO:0035295//tube development;GO:0048513//a…
ncbi_3639493	126	152	312	249	10.69	11.587	26.449	20.464	11.1385	23.4565	1.07443	0.000268524	0.00565011	--	orf19.6227	Ortholog of C. dubliniensis CD36 : Cd36_06390, C. parapsilosis CDC317 : CPAR2_209040, C. auris B8441 : B9J08_003388 and Candida tenuis NRRL Y-1498 : CANTEDRAFT_114052	XP_718816.1 hypothetical protein CAALFM_C106820WA [Candida albicans SC5314]	-	-	-	-	-	-	-
ncbi_3642050	370	482	736	985	63.747	74.61	126.7	164.384	69.1785	145.542	1.07304	5.25e-05	0.00155054	--	orf19.5250	Ortholog of C. dubliniensis CD36 : Cd36_11370, C. parapsilosis CDC317 : CPAR2_207480, C. auris B8441 : B9J08_001721 and Candida tenuis NRRL Y-1498 : CANTEDRAFT_120384	KGQ90861.1 hypothetical protein MEO_01179 [Candida albicans P94015]	-	-	-	-	-	GO:0003985//acetyl-CoA C-acetyltransferase activity	GO:0046356//acetyl-CoA catabolic process
ncbi_3643322	245	213	577	352	11.761	9.187	27.676	16.368	10.474	22.022	1.07213	0.000200438	0.00451105	--	orf19.7223	Ortholog(s) have protein-lysine N-methyltransferase activity, role in peptidyl-lysine monomethylation and cytosol, nucleus localization	XP_715024.1 protein-lysine N-methyltransferase [Candida albicans SC5314]	-	-	-	-	GO:0005575//cellular_component;GO:0005622//intracellular;GO:0005623//cell;GO:0005634//nucleus;GO:0005737//cytoplasm;GO:0005829//cytosol;GO:0043226//organelle;GO:0043227//membrane-bounded organelle;GO:0043229//intracellular organelle;GO:0043231//intracellular membrane-bounded organelle;GO:0044424//intracellular part;GO:0044444//cytoplasmic part;GO:0044464//cell part	GO:0003674//molecular_function;GO:0003824//catalytic activity;GO:0005515//protein binding;GO:0008168//methyltransferase activity;GO:0008170//N-methyltransferase activity;GO:0008276//protein methyltransferase activity;GO:0008757//S-adenosylmethionine-dependent methyltransferase activity;GO:0016278//lysine N-methyltransferase activity;GO:0016279//protein-lysine N-methyltransferase activity;GO:00167…	GO:0006464//cellular protein modification process;GO:0006479//protein methylation;GO:0006807//nitrogen compound metabolic process;GO:0008150//biological_process;GO:0008152//metabolic process;GO:0008213//protein alkylation;GO:0009987//cellular process;GO:0018022//peptidyl-lysine methylation;GO:0018026//peptidyl-lysine monomethylation;GO:0018193//peptidyl-amino acid modification;GO:0018205//peptidy…
ncbi_3639294	73	71	157	134	7.021	6.135	15.087	12.483	6.578	13.785	1.06738	0.00297615	0.0326352	HMX1	HMX1	Heme oxygenase; utilization of hemin iron; transcript induced by heat, low iron, or hemin; repressed by Efg1; induced by low iron; upregulated by Rim101 at pH 8; Hap43-induced; Spider and flow model biofilm induced	XP_719035.1 Hmx1p [Candida albicans SC5314]	-	-	-	-	GO:0005575//cellular_component;GO:0005622//intracellular;GO:0005623//cell;GO:0005634//nucleus;GO:0005635//nuclear envelope;GO:0005640//nuclear outer membrane;GO:0005737//cytoplasm;GO:0005783//endoplasmic reticulum;GO:0005789//endoplasmic reticulum membrane;GO:0012505//endomembrane system;GO:0016020//membrane;GO:0016021//integral component of membrane;GO:0019867//outer membrane;GO:0031090//organel…	GO:0003674//molecular_function;GO:0003824//catalytic activity;GO:0004392//heme oxygenase (decyclizing) activity;GO:0005488//binding;GO:0016491//oxidoreductase activity;GO:0016705//oxidoreductase activity, acting on paired donors, with incorporation or reduction of molecular oxygen;GO:0020037//heme binding;GO:0043167//ion binding;GO:0043169//cation binding;GO:0046872//metal ion binding;GO:0046906/…	GO:0006725//cellular aromatic compound metabolic process;GO:0006778//porphyrin-containing compound metabolic process;GO:0006787//porphyrin-containing compound catabolic process;GO:0006788//heme oxidation;GO:0006807//nitrogen compound metabolic process;GO:0006873//cellular ion homeostasis;GO:0006875//cellular metal ion homeostasis;GO:0006879//cellular iron ion homeostasis;GO:0006950//response to s…
ncbi_3648295	207	197	467	349	16.452	14.061	37.034	26.806	15.2565	31.92	1.06504	6.83e-05	0.00187809	--	orf19.1208	Predicted ORF in the Major Repeat Sequence on chromosome 4; member of a family encoded by FGR6-related genes in the RB2 repeat sequence	XP_710107.2 hypothetical protein CAALFM_C403990CA [Candida albicans SC5314]	-	-	-	-	-	-	-
ncbi_3640706	333	313	746	546	30.167	25.475	67.525	47.912	27.821	57.7185	1.05286	1.85e-05	0.000696361	CMS1	orf19.5049	Putative U3-containing 90S preribosome processome complex subunit; Hap43-induced gene; rat catheter and Spider biofilm induced; F-12/CO2 early biofilm induced	KGU31975.1 protein CMS1 [Candida albicans P34048]	-	-	-	-	GO:0005575//cellular_component;GO:0005622//intracellular;GO:0005623//cell;GO:0005634//nucleus;GO:0005737//cytoplasm;GO:0030684//preribosome;GO:0030686//90S preribosome;GO:0032991//macromolecular complex;GO:0043226//organelle;GO:0043227//membrane-bounded organelle;GO:0043229//intracellular organelle;GO:0043231//intracellular membrane-bounded organelle;GO:0044424//intracellular part;GO:0044464//cel…	GO:0003674//molecular_function;GO:0003676//nucleic acid binding;GO:0005524//ATP binding	GO:0008150//biological_process;GO:0022613//ribonucleoprotein complex biogenesis;GO:0042254//ribosome biogenesis;GO:0042274//ribosomal small subunit biogenesis;GO:0044085//cellular component biogenesis;GO:0071840//cellular component organization or biogenesis
ncbi_3641645	397	462	960	733	4.34	4.537	10.486	7.762	4.4385	9.124	1.03959	7.71e-06	0.000317408	FMP27	FMP27	Putative mitochondrial protein; mRNA binds She3	XP_716730.2 Fmp27p [Candida albicans SC5314]	-	-	-	-	GO:0005575//cellular_component;GO:0005622//intracellular;GO:0005623//cell;GO:0005737//cytoplasm;GO:0005739//mitochondrion;GO:0016021//integral component of membrane;GO:0043226//organelle;GO:0043227//membrane-bounded organelle;GO:0043229//intracellular organelle;GO:0043231//intracellular membrane-bounded organelle;GO:0044424//intracellular part;GO:0044444//cytoplasmic part;GO:0044464//cell part	GO:0003674//molecular_function;GO:0004518//nuclease activity	GO:0008150//biological_process
ncbi_3647531	419	422	1072	587	17.965	16.256	45.924	24.379	17.1105	35.1515	1.0387	0.000193264	0.00444801	RHD1	RHD1	Putative beta-mannosyltransferase required for the addition of beta-mannose to the acid-labile fraction of cell wall phosphopeptidomannan; 9-gene family memebr; regulated on yeast-hypha and white-opaque switches; Spider biofilm repressed	XP_710865.2 Rhd1p [Candida albicans SC5314]	-	-	-	-	GO:0005575//cellular_component;GO:0016020//membrane;GO:0016021//integral component of membrane;GO:0031224//intrinsic component of membrane;GO:0044425//membrane part	GO:0000030//mannosyltransferase activity;GO:0003674//molecular_function;GO:0003824//catalytic activity;GO:0016740//transferase activity;GO:0016757//transferase activity, transferring glycosyl groups;GO:0016758//transferase activity, transferring hexosyl groups	GO:0005975//carbohydrate metabolic process;GO:0005976//polysaccharide metabolic process;GO:0008150//biological_process;GO:0008152//metabolic process;GO:0009987//cellular process;GO:0010383//cell wall polysaccharide metabolic process;GO:0010412//mannan metabolic process;GO:0016043//cellular component organization;GO:0043170//macromolecule metabolic process;GO:0044036//cell wall macromolecule metab…
ncbi_3642282	70	82	160	138	5.43	5.715	12.402	10.37	5.5725	11.386	1.03086	0.00396878	0.0392534	GYG1	GLG2	Putative self-glucosylating initiator of glycogen synthesis; expression regulated upon white-opaque switch; hypha-induced; Spider biofilm induced	XP_716095.1 Glg2p [Candida albicans SC5314]	Metabolism;Metabolism;Metabolism	Global and overview maps;Global and overview maps;Carbohydrate metabolism	ko01100//Metabolic pathways;ko01110//Biosynthesis of secondary metabolites;ko00500//Starch and sucrose metabolism	K00750;K00750;K00750	-	GO:0016757//transferase activity, transferring glycosyl groups	-
ncbi_3634916	1480	1410	3275	2414	68.36	58.513	151.146	108.005	63.4365	129.576	1.03041	7.61e-07	4.58e-05	NAR1	NAR1	Putative cytosolic iron-sulfur (FeS) protein assembly machinery protein; induced by nitric oxide; oxidative stress-induced via Cap1p	XP_723443.2 Nar1p [Candida albicans SC5314]	-	-	-	-	GO:0005575//cellular_component;GO:0005622//intracellular;GO:0005623//cell;GO:0005634//nucleus;GO:0005737//cytoplasm;GO:0005829//cytosol;GO:0016020//membrane;GO:0032991//macromolecular complex;GO:0043226//organelle;GO:0043227//membrane-bounded organelle;GO:0043229//intracellular organelle;GO:0043231//intracellular membrane-bounded organelle;GO:0044424//intracellular part;GO:0044444//cytoplasmic pa…	GO:0003674//molecular_function;GO:0003824//catalytic activity;GO:0003954//NADH dehydrogenase activity;GO:0005488//binding;GO:0005506//iron ion binding;GO:0008901//ferredoxin hydrogenase activity;GO:0009055//electron carrier activity;GO:0016491//oxidoreductase activity;GO:0016651//oxidoreductase activity, acting on NAD(P)H;GO:0016695//oxidoreductase activity, acting on hydrogen as donor;GO:0016699…	GO:0001525//angiogenesis;GO:0001568//blood vessel development;GO:0001666//response to hypoxia;GO:0001944//vasculature development;GO:0002040//sprouting angiogenesis;GO:0002244//hematopoietic progenitor cell differentiation;GO:0002376//immune system process;GO:0002520//immune system development;GO:0006790//sulfur compound metabolic process;GO:0006807//nitrogen compound metabolic process;GO:0006950…
ncbi_3639872	797	727	1769	1221	32.112	26.317	71.217	47.653	29.2145	59.435	1.02463	7.77e-06	0.000317779	LSB6	orf19.2447	Putative Type II phosphatidylinositol 4-kinase; Ssr1-repressed; flow model biofilm repressed	KGQ98979.1 hypothetical protein MEU_00579 [Candida albicans P37005]	Metabolism;Metabolism;Environmental Information Processing	Global and overview maps;Carbohydrate metabolism;Signal transduction	ko01100//Metabolic pathways;ko00562//Inositol phosphate metabolism;ko04070//Phosphatidylinositol signaling system	K13711;K13711;K13711	GO:0000139//Golgi membrane;GO:0000322//storage vacuole;GO:0000323//lytic vacuole;GO:0000324//fungal-type vacuole;GO:0000329//fungal-type vacuole membrane;GO:0005575//cellular_component;GO:0005622//intracellular;GO:0005623//cell;GO:0005737//cytoplasm;GO:0005764//lysosome;GO:0005765//lysosomal membrane;GO:0005768//endosome;GO:0005773//vacuole;GO:0005774//vacuolar membrane;GO:0005794//Golgi apparatu…	GO:0000166//nucleotide binding;GO:0003674//molecular_function;GO:0003824//catalytic activity;GO:0004430//1-phosphatidylinositol 4-kinase activity;GO:0005488//binding;GO:0005524//ATP binding;GO:0008144//drug binding;GO:0016301//kinase activity;GO:0016740//transferase activity;GO:0016772//transferase activity, transferring phosphorus-containing groups;GO:0016773//phosphotransferase activity, alcoho…	GO:0006629//lipid metabolic process;GO:0006644//phospholipid metabolic process;GO:0006650//glycerophospholipid metabolic process;GO:0006793//phosphorus metabolic process;GO:0006796//phosphate-containing compound metabolic process;GO:0006996//organelle organization;GO:0007030//Golgi organization;GO:0007032//endosome organization;GO:0008150//biological_process;GO:0008152//metabolic process;GO:00099…
ncbi_3642019	189	190	396	344	22.78	20.575	47.69	40.162	21.6775	43.926	1.01888	0.000124815	0.00309633	--	orf19.5235	Putative mitochondrial ribosomal protein of the large subunit; Hap43-induced; mutants are viable; protein level decreases in stationary phase	XP_716304.1 mitochondrial 54S ribosomal protein YmL13 [Candida albicans SC5314]	-	-	-	-	GO:0005739//mitochondrion	-	-
ncbi_3639352	597	653	1176	1258	81.387	79.98	160.187	166.121	80.6835	163.154	1.01589	3.96e-06	0.000185762	RRS1	RRS1	Putative ribosome biogenesis and nuclear export protein; Hap43p-induced gene; mutation confers hypersensitivity to 5-fluorocytosine (5-FC), 5-fluorouracil (5-FU), and tubercidin (7-deazaadenosine)	XP_718976.1 Rrs1p [Candida albicans SC5314]	-	-	-	-	GO:0000228//nuclear chromosome;GO:0000793//condensed chromosome;GO:0000794//condensed nuclear chromosome;GO:0001650//fibrillar center;GO:0005575//cellular_component;GO:0005622//intracellular;GO:0005623//cell;GO:0005634//nucleus;GO:0005654//nucleoplasm;GO:0005694//chromosome;GO:0005730//nucleolus;GO:0005737//cytoplasm;GO:0005783//endoplasmic reticulum;GO:0012505//endomembrane system;GO:0030684//pr…	GO:0003674//molecular_function;GO:0003676//nucleic acid binding;GO:0003723//RNA binding;GO:0005488//binding;GO:0008097//5S rRNA binding;GO:0019843//rRNA binding;GO:0097159//organic cyclic compound binding;GO:1901363//heterocyclic compound binding	GO:0000027//ribosomal large subunit assembly;GO:0000054//ribosomal subunit export from nucleus;GO:0000055//ribosomal large subunit export from nucleus;GO:0000070//mitotic sister chromatid segregation;GO:0000278//mitotic cell cycle;GO:0000280//nuclear division;GO:0000447//endonucleolytic cleavage in ITS1 to separate SSU-rRNA from 5.8S rRNA and LSU-rRNA from tricistronic rRNA transcript (SSU-rRNA, …
ncbi_3639558	764	1046	1873	1620	82.84	101.899	202.921	170.148	92.3695	186.535	1.01395	5.9e-06	0.000258732	YUH1	orf19.6272	Putative ubiquitin C-terminal hydrolase; regulated by Gcn2p and Gcn4p	XP_718859.2 ubiquitin-specific protease [Candida albicans SC5314]	-	-	-	-	GO:0000502//proteasome complex;GO:0005575//cellular_component;GO:0005622//intracellular;GO:0005623//cell;GO:0005634//nucleus;GO:0005737//cytoplasm;GO:0005739//mitochondrion;GO:0005829//cytosol;GO:0032991//macromolecular complex;GO:0043226//organelle;GO:0043227//membrane-bounded organelle;GO:0043229//intracellular organelle;GO:0043231//intracellular membrane-bounded organelle;GO:0044424//intracell…	GO:0003674//molecular_function;GO:0003676//nucleic acid binding;GO:0003723//RNA binding;GO:0003729//mRNA binding;GO:0003730//mRNA 3'-UTR binding;GO:0003824//catalytic activity;GO:0004300//enoyl-CoA hydratase activity;GO:0004490//methylglutaconyl-CoA hydratase activity;GO:0004843//thiol-dependent ubiquitin-specific protease activity;GO:0005488//binding;GO:0005515//protein binding;GO:0008233//pepti…	GO:0000338//protein deneddylation;GO:0006082//organic acid metabolic process;GO:0006464//cellular protein modification process;GO:0006508//proteolysis;GO:0006511//ubiquitin-dependent protein catabolic process;GO:0006520//cellular amino acid metabolic process;GO:0006551//leucine metabolic process;GO:0006552//leucine catabolic process;GO:0006629//lipid metabolic process;GO:0006631//fatty acid metab…
ncbi_3636900	669	601	1523	947	49.835	40.223	113.357	68.331	45.029	90.844	1.01254	5.08e-05	0.00151417	YMR114C	orf19.3021	Putative protein of unknown function; Hap43-repressed gene; Spider biofilm induced	XP_019330628.1 putative peptide hydrolase [Candida albicans SC5314]	-	-	-	-	GO:0005575//cellular_component;GO:0005622//intracellular;GO:0005623//cell;GO:0005634//nucleus;GO:0005737//cytoplasm;GO:0043226//organelle;GO:0043227//membrane-bounded organelle;GO:0043229//intracellular organelle;GO:0043231//intracellular membrane-bounded organelle;GO:0044424//intracellular part;GO:0044464//cell part	GO:0003674//molecular_function;GO:0003697//single-stranded DNA binding;GO:0003824//catalytic activity;GO:0008233//peptidase activity;GO:0016787//hydrolase activity	GO:0006508//proteolysis;GO:0006807//nitrogen compound metabolic process;GO:0006974//cellular response to DNA damage stimulus;GO:0008150//biological_process;GO:0008152//metabolic process;GO:0018142//protein-DNA covalent cross-linking;GO:0019538//protein metabolic process;GO:0043170//macromolecule metabolic process;GO:0044238//primary metabolic process;GO:0071704//organic substance metabolic proces…
ncbi_3648118	169	189	351	343	5.94	5.968	12.327	11.678	5.954	12.0025	1.0114	0.000200475	0.00451105	BEM1	orf19.177	Has domain(s) with predicted phosphatidylinositol binding activity and role in cell communication	KHC89789.1 hypothetical protein I503_00615 [Candida albicans SC5314]	-	-	-	-	-	GO:0005515//protein binding;GO:0035091//phosphatidylinositol binding	-
ncbi_3646832	145	184	321	312	18.765	21.394	41.508	39.112	20.0795	40.31	1.00541	0.000419514	0.00795119	--	orf19.6354	Ortholog of C. dubliniensis CD36 : Cd36_11870, C. parapsilosis CDC317 : CPAR2_201650, C. auris B8441 : B9J08_002515 and Candida tenuis NRRL Y-1498 : cten_CGOB_00224	XP_711572.1 hypothetical protein CAALFM_C112690CA [Candida albicans SC5314]	-	-	-	-	-	-	-
ncbi_3636212	6230	7143	15388	10338	176.369	181.68	435.27	283.488	179.024	359.379	1.00535	2.56e-06	0.000129862	TEA1	ROB1	Zn(II)2Cys6 transcription factor; required for Spider model biofilm formation; mutant displays abnormal colony morphology and invasive growth; caspofungin repressed; flow model biofilm induced; rat catheter biofilm repressed	KHC66901.1 hypothetical protein MGE_01330 [Candida albicans P75010]	-	-	-	-	-	GO:0000981//RNA polymerase II transcription factor activity, sequence-specific DNA binding;GO:0003677//DNA binding;GO:0008270//zinc ion binding	GO:0006351//transcription, DNA-templated;GO:0006355//regulation of transcription, DNA-templated
ncbi_3645415	72	94	152	167	13.662	16.025	28.818	30.695	14.8435	29.7565	1.00337	0.00487983	0.0454425	cyb5r4	orf19.4522	Ortholog(s) have role in cellular response to DNA damage stimulus	XP_712947.1 hypothetical protein CAALFM_C102030CA [Candida albicans SC5314]	-	-	-	-	GO:0005575//cellular_component;GO:0005622//intracellular;GO:0005623//cell;GO:0005737//cytoplasm;GO:0005783//endoplasmic reticulum;GO:0005789//endoplasmic reticulum membrane;GO:0012505//endomembrane system;GO:0016020//membrane;GO:0031984//organelle subcompartment;GO:0042175//nuclear outer membrane-endoplasmic reticulum membrane network;GO:0043226//organelle;GO:0043227//membrane-bounded organelle;G…	GO:0000166//nucleotide binding;GO:0003674//molecular_function;GO:0003824//catalytic activity;GO:0003958//NADPH-hemoprotein reductase activity;GO:0004128//cytochrome-b5 reductase activity, acting on NAD(P)H;GO:0005488//binding;GO:0016174//NAD(P)H oxidase activity;GO:0016491//oxidoreductase activity;GO:0016651//oxidoreductase activity, acting on NAD(P)H;GO:0016653//oxidoreductase activity, acting o…	GO:0002790//peptide secretion;GO:0003032//detection of oxygen;GO:0006066//alcohol metabolic process;GO:0006091//generation of precursor metabolites and energy;GO:0006139//nucleobase-containing compound metabolic process;GO:0006629//lipid metabolic process;GO:0006694//steroid biosynthetic process;GO:0006696//ergosterol biosynthetic process;GO:0006725//cellular aromatic compound metabolic process;G…
ncbi_3641108	456	588	985	1021	23.326	27.024	50.344	50.59	25.175	50.467	1.00335	1.74e-05	0.000656975	PHR1	PHR1	Cell surface glycosidase; may act on cell-wall beta-1,3-glucan prior to beta-1,6-glucan linkage; role in systemic, not vaginal virulence (neutral, not low pH); high pH or filamentation induced; Bcr1-repressed in RPMI a/a biofilm	XP_717233.2 Phr1p [Candida albicans SC5314]	-	-	-	-	GO:0005575//cellular_component;GO:0005576//extracellular region;GO:0005618//cell wall;GO:0005621//cellular bud scar;GO:0005623//cell;GO:0005886//plasma membrane;GO:0005933//cellular bud;GO:0009277//fungal-type cell wall;GO:0009986//cell surface;GO:0016020//membrane;GO:0030312//external encapsulating structure;GO:0030428//cell septum;GO:0030445//yeast-form cell wall;GO:0030446//hyphal cell wall;GO…	GO:0003674//molecular_function;GO:0003824//catalytic activity;GO:0004553//hydrolase activity, hydrolyzing O-glycosyl compounds;GO:0016740//transferase activity;GO:0042123//glucanosyltransferase activity;GO:0042124//1,3-beta-glucanosyltransferase activity	GO:0005975//carbohydrate metabolic process;GO:0007155//cell adhesion;GO:0008150//biological_process;GO:0009268//response to pH;GO:0009405//pathogenesis;GO:0009628//response to abiotic stimulus;GO:0009987//cellular process;GO:0016043//cellular component organization;GO:0022610//biological adhesion;GO:0030447//filamentous growth;GO:0031505//fungal-type cell wall organization;GO:0031589//cell-substr…
ncbi_3641137	1605	1383	888	548	139.116	107.7	76.905	46.009	123.408	61.457	-1.00579	2.16e-06	0.000111677	MTD1	orf19.3810	Ortholog(s) have methylenetetrahydrofolate dehydrogenase (NAD+) activity, role in folic acid-containing compound biosynthetic process, one-carbon metabolic process, purine nucleobase biosynthetic process and cytosol localization	XP_717215.2 methylenetetrahydrofolate dehydrogenase (NAD(+)) [Candida albicans SC5314]	Metabolism;Metabolism	Global and overview maps;Metabolism of cofactors and vitamins	ko01100//Metabolic pathways;ko00670//One carbon pool by folate	K00295;K00295	GO:0005575//cellular_component;GO:0005622//intracellular;GO:0005623//cell;GO:0005634//nucleus;GO:0005737//cytoplasm;GO:0005829//cytosol;GO:0043226//organelle;GO:0043227//membrane-bounded organelle;GO:0043229//intracellular organelle;GO:0043231//intracellular membrane-bounded organelle;GO:0044424//intracellular part;GO:0044444//cytoplasmic part;GO:0044464//cell part	GO:0003674//molecular_function;GO:0003824//catalytic activity;GO:0004487//methylenetetrahydrofolate dehydrogenase (NAD+) activity;GO:0004488//methylenetetrahydrofolate dehydrogenase (NADP+) activity;GO:0016491//oxidoreductase activity;GO:0016620//oxidoreductase activity, acting on the aldehyde or oxo group of donors, NAD or NADP as acceptor;GO:0016645//oxidoreductase activity, acting on the CH-NH…	GO:0006082//organic acid metabolic process;GO:0006139//nucleobase-containing compound metabolic process;GO:0006144//purine nucleobase metabolic process;GO:0006163//purine nucleotide metabolic process;GO:0006164//purine nucleotide biosynthetic process;GO:0006575//cellular modified amino acid metabolic process;GO:0006725//cellular aromatic compound metabolic process;GO:0006730//one-carbon metabolic…
ncbi_3643224	618	603	324	261	57.659	50.546	30.204	23.588	54.1025	26.896	-1.0083	1.61e-06	8.72e-05	--	orf19.4370	Protein of unknown function; induced by nitric oxide; oxidative stress-induced via Cap1; fungal-specific (no human or murine homolog)	XP_715146.2 hypothetical protein CAALFM_CR03710CA [Candida albicans SC5314]	-	-	-	-	-	-	-
ncbi_3643924	1519	1321	722	639	105.59	82.501	50.147	43.026	94.0455	46.5865	-1.01345	1.28e-07	9.57e-06	GPD	GPD1	Glycerol-3-phosphate dehydrogenase; glycerol biosynthesis; regulated by Efg1; regulated by Tsa1, Tsa1B under H2O2 stress conditions; Sflow model and Spider biofilm induced	XP_714402.1 glycerol-3-phosphate dehydrogenase (NAD(+)) [Candida albicans SC5314]	Metabolism;Environmental Information Processing;Metabolism	Global and overview maps;Signal transduction;Lipid metabolism	ko01110//Biosynthesis of secondary metabolites;ko04011//MAPK signaling pathway - yeast;ko00564//Glycerophospholipid metabolism	K00006;K00006;K00006	-	GO:0004367//glycerol-3-phosphate dehydrogenase [NAD+] activity;GO:0016616//oxidoreductase activity, acting on the CH-OH group of donors, NAD or NADP as acceptor;GO:0051287//NAD binding	GO:0005975//carbohydrate metabolic process;GO:0046168//glycerol-3-phosphate catabolic process;GO:0055114//oxidation-reduction process
ncbi_3647131	16176	14950	7005	7889	725.678	602.566	313.994	342.814	664.122	328.404	-1.01598	5.36e-08	4.33e-06	FET3	FET34	Multicopper ferroxidase; induced by low iron, ciclopirox olamine, ketoconazole, hypoxia; alkaline induced by Rim101; repressed in fluconazole-resistant isolate; Sfu1, Hog1 repressed; complements S. cerevisiae fet3; Spider biofilm induced	KGQ85926.1 iron transport multicopper oxidase FET3 [Candida albicans P37005]	-	-	-	-	-	GO:0005375//copper ion transmembrane transporter activity;GO:0005507//copper ion binding;GO:0016491//oxidoreductase activity;GO:0050304//nitrous-oxide reductase activity	GO:0006825//copper ion transport;GO:0019333//denitrification pathway;GO:0055114//oxidation-reduction process
ncbi_3643452	347	476	203	186	12.993	16.013	7.595	6.746	14.503	7.1705	-1.01621	2.63e-05	0.000924774	CFL1	FRE9	Ferric reductase; alkaline induced; ciclopirox olamine; Hap43-induced	XP_714897.1 Fre9p [Candida albicans SC5314]	-	-	-	-	-	GO:0016491//oxidoreductase activity;GO:0016655//oxidoreductase activity, acting on NAD(P)H, quinone or similar compound as acceptor	GO:0006814//sodium ion transport;GO:0010124//phenylacetate catabolic process;GO:0055114//oxidation-reduction process
ncbi_3643206	2411	2298	1251	980	86.253	73.862	44.717	33.96	80.0575	39.3385	-1.02509	9.67e-09	9.29e-07	VTC2	VTC3	Putative polyphosphate synthetase; downregulated in core caspofungin response; Hog1p-induced; transcription is opaque-specific; fungal-specific (no human or murine homolog)	XP_715157.2 vacuolar transporter chaperone [Candida albicans SC5314]	-	-	-	-	GO:0000322//storage vacuole;GO:0000323//lytic vacuole;GO:0000324//fungal-type vacuole;GO:0000329//fungal-type vacuole membrane;GO:0005575//cellular_component;GO:0005622//intracellular;GO:0005623//cell;GO:0005681//spliceosomal complex;GO:0005737//cytoplasm;GO:0005773//vacuole;GO:0005774//vacuolar membrane;GO:0005794//Golgi apparatus;GO:0005886//plasma membrane;GO:0012505//endomembrane system;GO:00…	GO:0005515//protein binding	GO:0000398//mRNA splicing, via spliceosome;GO:0006810//transport;GO:0006914//autophagy;GO:0006996//organelle organization;GO:0007033//vacuole organization;GO:0007034//vacuolar transport;GO:0008150//biological_process;GO:0008152//metabolic process;GO:0009056//catabolic process;GO:0009987//cellular process;GO:0016043//cellular component organization;GO:0042144//vacuole fusion, non-autophagic;GO:004…
ncbi_3637835	218	343	117	146	7.403	10.465	3.97	4.802	8.934	4.386	-1.0264	0.000543575	0.0096017	SUL1	SUL2	Putative sulfate transporter; transcript negatively regulated by Sfu1; amphotericin B induced; F-12/CO2 and Spider biofilm induced	XP_720488.2 sulfate permease [Candida albicans SC5314]	-	-	-	-	GO:0000323//lytic vacuole;GO:0005575//cellular_component;GO:0005622//intracellular;GO:0005623//cell;GO:0005634//nucleus;GO:0005654//nucleoplasm;GO:0005737//cytoplasm;GO:0005764//lysosome;GO:0005765//lysosomal membrane;GO:0005773//vacuole;GO:0005774//vacuolar membrane;GO:0005783//endoplasmic reticulum;GO:0005794//Golgi apparatus;GO:0005886//plasma membrane;GO:0005887//integral component of plasma …	GO:0003674//molecular_function;GO:0005215//transporter activity;GO:0005216//ion channel activity;GO:0005253//anion channel activity;GO:0005254//chloride channel activity;GO:0005310//dicarboxylic acid transmembrane transporter activity;GO:0005342//organic acid transmembrane transporter activity;GO:0008271//secondary active sulfate transmembrane transporter activity;GO:0008509//anion transmembrane …	GO:0006810//transport;GO:0006811//ion transport;GO:0006820//anion transport;GO:0006821//chloride transport;GO:0006835//dicarboxylic acid transport;GO:0006873//cellular ion homeostasis;GO:0006885//regulation of pH;GO:0008150//biological_process;GO:0008272//sulfate transport;GO:0009987//cellular process;GO:0015689//molybdate ion transport;GO:0015698//inorganic anion transport;GO:0015701//bicarbonat…
ncbi_3634852	1134	946	530	456	74.933	56.162	34.993	29.187	65.5475	32.09	-1.03042	4e-07	2.63e-05	FTH1	FTH1	Putative iron permease involved in the production of prostaglandin E2; mutants show decreased metabolic activity in biofilms	XP_723488.2 Fth1p [Candida albicans SC5314]	-	-	-	-	GO:0000322//storage vacuole;GO:0000323//lytic vacuole;GO:0000324//fungal-type vacuole;GO:0000329//fungal-type vacuole membrane;GO:0005575//cellular_component;GO:0005622//intracellular;GO:0005623//cell;GO:0005737//cytoplasm;GO:0005773//vacuole;GO:0005774//vacuolar membrane;GO:0005783//endoplasmic reticulum;GO:0012505//endomembrane system;GO:0016020//membrane;GO:0016021//integral component of membr…	GO:0003674//molecular_function;GO:0005215//transporter activity;GO:0005315//inorganic phosphate transmembrane transporter activity;GO:0005381//iron ion transmembrane transporter activity;GO:0008324//cation transmembrane transporter activity;GO:0015075//ion transmembrane transporter activity;GO:0015318//inorganic solute uptake transmembrane transporter activity;GO:0022857//transmembrane transporte…	GO:0000041//transition metal ion transport;GO:0006810//transport;GO:0006811//ion transport;GO:0006812//cation transport;GO:0006817//phosphate ion transport;GO:0006826//iron ion transport;GO:0006897//endocytosis;GO:0008150//biological_process;GO:0015684//ferrous iron transport;GO:0016192//vesicle-mediated transport;GO:0030001//metal ion transport;GO:0034220//ion transmembrane transport;GO:0034755/…
ncbi_3646724	6180	5763	2960	2644	351.325	294.347	168.133	145.595	322.836	156.864	-1.04129	9.1e-10	1e-07	SHM1	SHM1	Mitochondrial serine hydroxymethyltransferase; complements the glycine auxotrophy of an S. cerevisiae shm1 null shm2 null gly1-1 triple mutant; protein present in exponential and stationary growth phase yeast cultures	XP_711682.2 glycine hydroxymethyltransferase [Candida albicans SC5314]	Metabolism;Metabolism;Metabolism;Metabolism;Metabolism;Metabolism;Metabolism;Metabolism;Metabolism	Global and overview maps;Global and overview maps;Global and overview maps;Global and overview maps;Amino acid metabolism;Carbohydrate metabolism;Energy metabolism;Metabolism of cofactors and vitamins;Metabolism of other amino acids	ko01100//Metabolic pathways;ko01110//Biosynthesis of secondary metabolites;ko01230//Biosynthesis of amino acids;ko01200//Carbon metabolism;ko00260//Glycine, serine and threonine metabolism;ko00630//Glyoxylate and dicarboxylate metabolism;ko00680//Methane metabolism;ko00670//One carbon pool by folate;ko00460//Cyanoamino acid metabolism	K00600;K00600;K00600;K00600;K00600;K00600;K00600;K00600;K00600	GO:0005575//cellular_component;GO:0005622//intracellular;GO:0005623//cell;GO:0005737//cytoplasm;GO:0005739//mitochondrion;GO:0043226//organelle;GO:0043227//membrane-bounded organelle;GO:0043229//intracellular organelle;GO:0043231//intracellular membrane-bounded organelle;GO:0044424//intracellular part;GO:0044444//cytoplasmic part;GO:0044464//cell part	GO:0003674//molecular_function;GO:0003824//catalytic activity;GO:0004372//glycine hydroxymethyltransferase activity;GO:0005488//binding;GO:0008144//drug binding;GO:0008710//8-amino-7-oxononanoate synthase activity;GO:0016740//transferase activity;GO:0016741//transferase activity, transferring one-carbon groups;GO:0016742//hydroxymethyl-, formyl- and related transferase activity;GO:0019842//vitami…	GO:0001505//regulation of neurotransmitter levels;GO:0006082//organic acid metabolic process;GO:0006520//cellular amino acid metabolic process;GO:0006544//glycine metabolic process;GO:0006545//glycine biosynthetic process;GO:0006563//L-serine metabolic process;GO:0006575//cellular modified amino acid metabolic process;GO:0006725//cellular aromatic compound metabolic process;GO:0006730//one-carbon…
ncbi_3640511	3786	3742	1626	1899	226.219	200.883	97.076	109.91	213.551	103.493	-1.04505	7.39e-08	5.81e-06	ERG4	ERG4	Protein similar to sterol C-24 reductase; shows Mob2p-dependent hyphal regulation; fluconazole-induced; caspofungin repressed; rat catheter biofilm repressed	XP_717756.2 delta(24(24(1)))-sterol reductase [Candida albicans SC5314]	Metabolism;Metabolism;Metabolism	Global and overview maps;Global and overview maps;Lipid metabolism	ko01100//Metabolic pathways;ko01110//Biosynthesis of secondary metabolites;ko00100//Steroid biosynthesis	K00223;K00223;K00223	GO:0005575//cellular_component;GO:0005622//intracellular;GO:0005623//cell;GO:0005737//cytoplasm;GO:0005783//endoplasmic reticulum;GO:0005789//endoplasmic reticulum membrane;GO:0012505//endomembrane system;GO:0016020//membrane;GO:0016021//integral component of membrane;GO:0030176//integral component of endoplasmic reticulum membrane;GO:0031224//intrinsic component of membrane;GO:0031227//intrinsic…	GO:0000166//nucleotide binding;GO:0000246//delta24(24-1) sterol reductase activity;GO:0003674//molecular_function;GO:0003824//catalytic activity;GO:0005488//binding;GO:0016491//oxidoreductase activity;GO:0016627//oxidoreductase activity, acting on the CH-CH group of donors;GO:0016628//oxidoreductase activity, acting on the CH-CH group of donors, NAD or NADP as acceptor;GO:0036094//small molecule …	GO:0006066//alcohol metabolic process;GO:0006629//lipid metabolic process;GO:0006694//steroid biosynthetic process;GO:0006696//ergosterol biosynthetic process;GO:0008150//biological_process;GO:0008152//metabolic process;GO:0008202//steroid metabolic process;GO:0008204//ergosterol metabolic process;GO:0008610//lipid biosynthetic process;GO:0009058//biosynthetic process;GO:0009987//cellular process…
ncbi_3641791	1395	1306	736	525	94.857	79.787	50.005	34.58	87.322	42.2925	-1.04594	8.43e-08	6.54e-06	YGR111W	orf19.1272	Protein of unknown function; may play a role in regulation of cell size; rat catheter biofilm repressed	XP_716580.2 hypothetical protein CAALFM_C405850CA [Candida albicans SC5314]	-	-	-	-	-	GO:0008080//N-acetyltransferase activity;GO:0016747//transferase activity, transferring acyl groups other than amino-acyl groups	-
ncbi_3638967	610	794	254	396	30.16	35.27	12.548	18.965	32.715	15.7565	-1.05401	9.16e-05	0.00241007	CHT3	CHT3	Major chitinase; secreted; functional homolog of S. cerevisiae Cts1p; 4 N-glycosylation motifs; possible O-mannosylation; putative signal peptide; hyphal-repressed; farnesol upregulated in biofilm; regulated by Efg1p, Cyr1p, Ras1p	KHC42785.1 chitinase 3 [Candida albicans P60002]	Metabolism;Metabolism	Global and overview maps;Carbohydrate metabolism	ko01100//Metabolic pathways;ko00520//Amino sugar and nucleotide sugar metabolism	K01183;K01183	GO:0000322//storage vacuole;GO:0000323//lytic vacuole;GO:0000324//fungal-type vacuole;GO:0005575//cellular_component;GO:0005576//extracellular region;GO:0005618//cell wall;GO:0005622//intracellular;GO:0005623//cell;GO:0005634//nucleus;GO:0005635//nuclear envelope;GO:0005737//cytoplasm;GO:0005773//vacuole;GO:0005783//endoplasmic reticulum;GO:0005933//cellular bud;GO:0005935//cellular bud neck;GO:0…	GO:0003674//molecular_function;GO:0003824//catalytic activity;GO:0004553//hydrolase activity, hydrolyzing O-glycosyl compounds;GO:0004568//chitinase activity;GO:0005488//binding;GO:0008061//chitin binding;GO:0008144//drug binding;GO:0008843//endochitinase activity;GO:0016787//hydrolase activity;GO:0016798//hydrolase activity, acting on glycosyl bonds;GO:0097367//carbohydrate derivative binding	GO:0000272//polysaccharide catabolic process;GO:0000278//mitotic cell cycle;GO:0000281//mitotic cytokinesis;GO:0000282//cellular bud site selection;GO:0000910//cytokinesis;GO:0000920//cell separation after cytokinesis;GO:0005975//carbohydrate metabolic process;GO:0005976//polysaccharide metabolic process;GO:0006022//aminoglycan metabolic process;GO:0006026//aminoglycan catabolic process;GO:000603…
ncbi_3645892	132	147	68	61	28.298	28.313	14.566	12.667	28.3055	13.6165	-1.05573	0.00118546	0.0171665	--	orf19.6920	Protein of unknown function; induced during chlamydospore formation in both C. albicans and C. dubliniensis; Hap43-induced gene; Spider biofilm induced; F-12/CO2 early biofilm induced	KHC48544.1 Hap43p-induced protein [Candida albicans P37039]	-	-	-	-	-	-	GO:0009235//cobalamin metabolic process
ncbi_3648275	3354	3198	1550	1487	233.725	200.222	107.923	100.373	216.974	104.148	-1.05888	1.84e-09	1.99e-07	PACTB	ERG10	Acetyl-CoA acetyltransferase; role in ergosterol biosynthesis; soluble in hyphae; changes in protein abundance associated with azole resistance; fluconazole or ketoconazole induced; macrophage-downregulated protein; GlcNAc-induced protein	XP_710124.1 acetyl-CoA C-acetyltransferase [Candida albicans SC5314]	Metabolism;Metabolism;Metabolism;Metabolism;Metabolism;Metabolism;Metabolism;Metabolism;Metabolism;Metabolism;Metabolism;Metabolism;Metabolism;Metabolism	Global and overview maps;Global and overview maps;Global and overview maps;Carbohydrate metabolism;Global and overview maps;Carbohydrate metabolism;Lipid metabolism;Carbohydrate metabolism;Metabolism of terpenoids and polyketides;Amino acid metabolism;Amino acid metabolism;Amino acid metabolism;Carbohydrate metabolism;Lipid metabolism	ko01100//Metabolic pathways;ko01110//Biosynthesis of secondary metabolites;ko01200//Carbon metabolism;ko00620//Pyruvate metabolism;ko01212//Fatty acid metabolism;ko00630//Glyoxylate and dicarboxylate metabolism;ko00071//Fatty acid degradation;ko00640//Propanoate metabolism;ko00900//Terpenoid backbone biosynthesis;ko00280//Valine, leucine and isoleucine degradation;ko00380//Tryptophan metabolism;k…	K00626;K00626;K00626;K00626;K00626;K00626;K00626;K00626;K00626;K00626;K00626;K00626;K00626;K00626	GO:0005575//cellular_component;GO:0005622//intracellular;GO:0005623//cell;GO:0005634//nucleus;GO:0005737//cytoplasm;GO:0005829//cytosol;GO:0043226//organelle;GO:0043227//membrane-bounded organelle;GO:0043229//intracellular organelle;GO:0043231//intracellular membrane-bounded organelle;GO:0044424//intracellular part;GO:0044444//cytoplasmic part;GO:0044464//cell part	GO:0003674//molecular_function;GO:0003785//actin monomer binding;GO:0003824//catalytic activity;GO:0003985//acetyl-CoA C-acetyltransferase activity;GO:0003988//acetyl-CoA C-acyltransferase activity;GO:0004315//3-oxoacyl-[acyl-carrier-protein] synthase activity;GO:0005488//binding;GO:0016407//acetyltransferase activity;GO:0016408//C-acyltransferase activity;GO:0016453//C-acetyltransferase activity…	GO:0006066//alcohol metabolic process;GO:0006082//organic acid metabolic process;GO:0006629//lipid metabolic process;GO:0006631//fatty acid metabolic process;GO:0006633//fatty acid biosynthetic process;GO:0006635//fatty acid beta-oxidation;GO:0006694//steroid biosynthetic process;GO:0006696//ergosterol biosynthetic process;GO:0007015//actin filament organization;GO:0008150//biological_process;GO:…
ncbi_3634783	130	150	63	66	15.275	15.835	7.397	7.512	15.555	7.4545	-1.06119	0.00133918	0.018764	--	orf19.4886	Putative adhesin-like protein; Hap43-repressed; rat catheter and Spider biofilm induced	KGU34379.1 putative adhesin-like protein [Candida albicans P75063]	-	-	-	-	-	GO:0004866//endopeptidase inhibitor activity	-
ncbi_3642999	1136	952	496	470	143.061	107.713	62.412	57.333	125.387	59.8725	-1.06642	2.11e-07	1.49e-05	ADE8	ADE8	Putative phosphoribosylglycinamide formyl-transferase, enzyme of amino acid biosynthesis pathway; upregulated in biofilm; S. cerevisiae ortholog is Gcn4p regulated; protein enriched in stationary phase yeast-form cultures	XP_715330.2 phosphoribosylglycinamide formyltransferase [Candida albicans SC5314]	Metabolism;Metabolism;Metabolism;Metabolism	Global and overview maps;Global and overview maps;Nucleotide metabolism;Metabolism of cofactors and vitamins	ko01100//Metabolic pathways;ko01110//Biosynthesis of secondary metabolites;ko00230//Purine metabolism;ko00670//One carbon pool by folate	K00601;K00601;K00601;K00601	GO:0005575//cellular_component;GO:0005622//intracellular;GO:0005623//cell;GO:0005634//nucleus;GO:0005737//cytoplasm;GO:0043226//organelle;GO:0043227//membrane-bounded organelle;GO:0043229//intracellular organelle;GO:0043231//intracellular membrane-bounded organelle;GO:0044424//intracellular part;GO:0044464//cell part	GO:0003674//molecular_function;GO:0003824//catalytic activity;GO:0004644//phosphoribosylglycinamide formyltransferase activity;GO:0008864//formyltetrahydrofolate deformylase activity;GO:0016740//transferase activity;GO:0016741//transferase activity, transferring one-carbon groups;GO:0016742//hydroxymethyl-, formyl- and related transferase activity	GO:0006139//nucleobase-containing compound metabolic process;GO:0006144//purine nucleobase metabolic process;GO:0006163//purine nucleotide metabolic process;GO:0006164//purine nucleotide biosynthetic process;GO:0006188//IMP biosynthetic process;GO:0006189//'de novo' IMP biosynthetic process;GO:0006725//cellular aromatic compound metabolic process;GO:0006753//nucleoside phosphate metabolic process…
ncbi_3642989	24068	22134	11218	9956	790.535	653.178	368.161	316.759	721.856	342.46	-1.07578	1.26e-10	1.52e-08	RNR1	RNR1	Ribonucleotide reductase large subunit; induced in low iron; transposon mutation affects filamentous growth; farnesol upregulated in biofilm; regulated by cell cycle, tyrosol, cell density; regulated by Sef1, Sfu1, and Hap43	XP_715320.1 ribonucleotide-diphosphate reductase subunit [Candida albicans SC5314]	Metabolism;Metabolism;Metabolism;Metabolism	Global and overview maps;Nucleotide metabolism;Nucleotide metabolism;Metabolism of other amino acids	ko01100//Metabolic pathways;ko00230//Purine metabolism;ko00240//Pyrimidine metabolism;ko00480//Glutathione metabolism	K10807;K10807;K10807;K10807	GO:0005575//cellular_component;GO:0005622//intracellular;GO:0005623//cell;GO:0005634//nucleus;GO:0005635//nuclear envelope;GO:0005737//cytoplasm;GO:0005829//cytosol;GO:0005971//ribonucleoside-diphosphate reductase complex;GO:0012505//endomembrane system;GO:0031967//organelle envelope;GO:0031975//envelope;GO:0032991//macromolecular complex;GO:0036477//somatodendritic compartment;GO:0042995//cell p…	GO:0000166//nucleotide binding;GO:0003674//molecular_function;GO:0003824//catalytic activity;GO:0004550//nucleoside diphosphate kinase activity;GO:0004748//ribonucleoside-diphosphate reductase activity, thioredoxin disulfide as acceptor;GO:0005488//binding;GO:0005515//protein binding;GO:0005524//ATP binding;GO:0008144//drug binding;GO:0016301//kinase activity;GO:0016491//oxidoreductase activity;G…	GO:0000003//reproduction;GO:0000278//mitotic cell cycle;GO:0001654//eye development;GO:0003006//developmental process involved in reproduction;GO:0006139//nucleobase-containing compound metabolic process;GO:0006165//nucleoside diphosphate phosphorylation;GO:0006206//pyrimidine nucleobase metabolic process;GO:0006213//pyrimidine nucleoside metabolic process;GO:0006220//pyrimidine nucleotide metabo…
ncbi_3635224	552	518	256	234	35.312	29.772	16.363	14.5	32.542	15.4315	-1.07642	9.75e-07	5.73e-05	--	orf19.5952	Protein of unknown function; induced by nitric oxide independent of Yhb1; Sef1, Sfu1, and Hap43-induced; rat catheter and Spider biofilm induced	KHC55686.1 Hap43p-induced protein of unknown function [Candida albicans P37039]	-	-	-	-	-	GO:0005515//protein binding	-
ncbi_3643890	1154	1046	577	427	89.525	72.906	44.726	32.087	81.2155	38.4065	-1.0804	6.45e-08	5.14e-06	GOR1	orf19.225	Predicted 2-hydroxyacid dehydrogenase; Hap43-repressed gen	XP_712608.1 hypothetical protein CAALFM_C208850CA [Candida albicans SC5314]	Metabolism;Metabolism;Metabolism	Global and overview maps;Global and overview maps;Carbohydrate metabolism	ko01100//Metabolic pathways;ko01110//Biosynthesis of secondary metabolites;ko00630//Glyoxylate and dicarboxylate metabolism	K00015;K00015;K00015	-	GO:0004013//adenosylhomocysteinase activity;GO:0004455//ketol-acid reductoisomerase activity;GO:0004617//phosphoglycerate dehydrogenase activity;GO:0004665//prephenate dehydrogenase (NADP+) activity;GO:0008679//2-hydroxy-3-oxopropionate reductase activity;GO:0008977//prephenate dehydrogenase activity;GO:0016616//oxidoreductase activity, acting on the CH-OH group of donors, NAD or NADP as acceptor…	GO:0006564//L-serine biosynthetic process;GO:0006571//tyrosine biosynthetic process;GO:0006730//one-carbon metabolic process;GO:0009097//isoleucine biosynthetic process;GO:0009099//valine biosynthetic process;GO:0009228//thiamine biosynthetic process;GO:0046168//glycerol-3-phosphate catabolic process;GO:0055114//oxidation-reduction process
ncbi_3645008	1977	3029	941	1322	74.225	102.173	35.3	48.077	88.199	41.6885	-1.08111	1.18e-05	0.00046629	OPT5	OPT7	Putative oligopeptide transporter; possibly transports GSH or related compounds; Hog1-induced; expression of OPT6, -7, or -8 does not suppress defect of mutant lacking OPT1-3; Hap43-repressed; F-12/CO2 early biofilm induced	XP_713354.2 Opt7p [Candida albicans SC5314]	-	-	-	-	-	GO:0015198//oligopeptide transporter activity	GO:0055085//transmembrane transport
ncbi_3646393	417	435	181	207	38.522	36.104	16.707	18.523	37.313	17.615	-1.08287	8.05e-06	0.000326927	SPAC1B3.06c	CRG1	Methyltransferase involved in sphingolipid homeostasis, methylates a drug cantharidin; decreased expression in hyphae compared to yeast; expression regulated during planktonic growth; flow model biofilm induced; Hap43-repressed gene	XP_711979.2 Crg1p [Candida albicans SC5314]	-	-	-	-	-	GO:0003674//molecular_function;GO:0003824//catalytic activity;GO:0008168//methyltransferase activity;GO:0008170//N-methyltransferase activity;GO:0008171//O-methyltransferase activity;GO:0008176//tRNA (guanine-N7-)-methyltransferase activity;GO:0008689//3-demethylubiquinone-9 3-O-methyltransferase activity;GO:0008757//S-adenosylmethionine-dependent methyltransferase activity;GO:0016740//transferas…	GO:0006400//tRNA modification;GO:0006412//translation;GO:0006480//N-terminal protein amino acid methylation;GO:0006744//ubiquinone biosynthetic process;GO:0008150//biological_process;GO:0008152//metabolic process;GO:0008299//isoprenoid biosynthetic process;GO:0009086//methionine biosynthetic process;GO:0009102//biotin biosynthetic process;GO:0009234//menaquinone biosynthetic process;GO:0015995//c…
ncbi_3647480	96	142	48	59	9.017	11.983	4.505	5.368	10.5	4.9365	-1.08883	0.00350946	0.0363746	--	TES1	Putative acyl-CoA thioesterase	XP_710925.1 Tes1p [Candida albicans SC5314]	-	-	-	-	-	-	GO:0006637//acyl-CoA metabolic process
ncbi_3643773	3148	2649	1316	1315	168.392	127.309	70.337	68.136	147.851	69.2365	-1.09453	1.08e-08	1.01e-06	ACH1	ACH1	Acetyl-coA hydrolase; acetate utilization; nonessential; soluble protein in hyphae; antigenic in human; induced on polystyrene adherence; farnesol-, ketoconazole-induced; no human or murine homolog; stationary phase-enriched protein	XP_714589.2 acetyl-CoA hydrolase [Candida albicans SC5314]	Metabolism;Metabolism	Global and overview maps;Carbohydrate metabolism	ko01100//Metabolic pathways;ko00620//Pyruvate metabolism	K01067;K01067	GO:0005575//cellular_component;GO:0005622//intracellular;GO:0005623//cell;GO:0005737//cytoplasm;GO:0005739//mitochondrion;GO:0005829//cytosol;GO:0043226//organelle;GO:0043227//membrane-bounded organelle;GO:0043229//intracellular organelle;GO:0043231//intracellular membrane-bounded organelle;GO:0044424//intracellular part;GO:0044444//cytoplasmic part;GO:0044464//cell part	GO:0003674//molecular_function;GO:0003824//catalytic activity;GO:0003986//acetyl-CoA hydrolase activity;GO:0008410//CoA-transferase activity;GO:0008775//acetate CoA-transferase activity;GO:0016289//CoA hydrolase activity;GO:0016740//transferase activity;GO:0016782//transferase activity, transferring sulfur-containing groups;GO:0016787//hydrolase activity;GO:0016788//hydrolase activity, acting on …	GO:0006082//organic acid metabolic process;GO:0006083//acetate metabolic process;GO:0006084//acetyl-CoA metabolic process;GO:0006139//nucleobase-containing compound metabolic process;GO:0006163//purine nucleotide metabolic process;GO:0006629//lipid metabolic process;GO:0006631//fatty acid metabolic process;GO:0006633//fatty acid biosynthetic process;GO:0006637//acyl-CoA metabolic process;GO:00067…
ncbi_3639691	1219	1158	554	510	82.095	70.067	37.279	33.269	76.081	35.274	-1.10893	7.19e-09	7.25e-07	ARG1	ARG1	Argininosuccinate synthase; arginine synthesis; Gcn4, Rim101 regulated; induced by amino acid starvation (3-AT), benomyl treatment; stationary phase enriched protein; repressed in alkalinizing medium; rat catheter, Spider biofilm induced	XP_718627.2 argininosuccinate synthase [Candida albicans SC5314]	Metabolism;Metabolism;Metabolism;Metabolism;Metabolism	Global and overview maps;Global and overview maps;Global and overview maps;Amino acid metabolism;Amino acid metabolism	ko01100//Metabolic pathways;ko01110//Biosynthesis of secondary metabolites;ko01230//Biosynthesis of amino acids;ko00250//Alanine, aspartate and glutamate metabolism;ko00220//Arginine biosynthesis	K01940;K01940;K01940;K01940;K01940	GO:0000323//lytic vacuole;GO:0005575//cellular_component;GO:0005622//intracellular;GO:0005623//cell;GO:0005634//nucleus;GO:0005737//cytoplasm;GO:0005739//mitochondrion;GO:0005740//mitochondrial envelope;GO:0005741//mitochondrial outer membrane;GO:0005764//lysosome;GO:0005773//vacuole;GO:0005783//endoplasmic reticulum;GO:0005829//cytosol;GO:0012505//endomembrane system;GO:0016020//membrane;GO:0019…	GO:0000166//nucleotide binding;GO:0003674//molecular_function;GO:0003824//catalytic activity;GO:0004055//argininosuccinate synthase activity;GO:0004066//asparagine synthase (glutamine-hydrolyzing) activity;GO:0004808//tRNA (5-methylaminomethyl-2-thiouridylate)-methyltransferase activity;GO:0005488//binding;GO:0005515//protein binding;GO:0005524//ATP binding;GO:0008144//drug binding;GO:0015643//to…	GO:0000050//urea cycle;GO:0000052//citrulline metabolic process;GO:0000053//argininosuccinate metabolic process;GO:0001101//response to acid chemical;GO:0001505//regulation of neurotransmitter levels;GO:0001655//urogenital system development;GO:0001822//kidney development;GO:0001889//liver development;GO:0002237//response to molecule of bacterial origin;GO:0002376//immune system process;GO:000252…
ncbi_3639722	4777	4617	2042	2138	459.43	398.947	196.228	199.175	429.188	197.702	-1.11829	5.87e-10	6.58e-08	ADE1	ADE1	Phosphoribosylaminoimadazole succinocarboxamide synthetase, enzyme of adenine biosynthesis; not induced in GCN response, unlike the S. cerevisiae ortholog; fungal-specific (no human or murine homolog); levels decrease in stationary phase	XP_718641.1 phosphoribosylaminoimidazolesuccinocarboxamide synthase [Candida albicans SC5314]	Metabolism;Metabolism;Metabolism	Global and overview maps;Global and overview maps;Nucleotide metabolism	ko01100//Metabolic pathways;ko01110//Biosynthesis of secondary metabolites;ko00230//Purine metabolism	K01923;K01923;K01923	GO:0005575//cellular_component;GO:0005622//intracellular;GO:0005623//cell;GO:0005634//nucleus;GO:0005737//cytoplasm;GO:0043226//organelle;GO:0043227//membrane-bounded organelle;GO:0043229//intracellular organelle;GO:0043231//intracellular membrane-bounded organelle;GO:0044424//intracellular part;GO:0044464//cell part	GO:0000166//nucleotide binding;GO:0003674//molecular_function;GO:0003824//catalytic activity;GO:0004638//phosphoribosylaminoimidazole carboxylase activity;GO:0004639//phosphoribosylaminoimidazolesuccinocarboxamide synthase activity;GO:0005488//binding;GO:0005515//protein binding;GO:0005524//ATP binding;GO:0008144//drug binding;GO:0016829//lyase activity;GO:0016830//carbon-carbon lyase activity;GO…	GO:0006082//organic acid metabolic process;GO:0006106//fumarate metabolic process;GO:0006139//nucleobase-containing compound metabolic process;GO:0006144//purine nucleobase metabolic process;GO:0006163//purine nucleotide metabolic process;GO:0006164//purine nucleotide biosynthetic process;GO:0006188//IMP biosynthetic process;GO:0006189//'de novo' IMP biosynthetic process;GO:0006725//cellular arom…
ncbi_3639268	193	151	58	95	12.936	9.093	3.884	6.168	11.0145	5.026	-1.13192	0.00174213	0.0224843	SAP5	SAP5	Biofilm-specific aspartyl protease; virulence role effected by URA3; expressed during infection; mRNA localized to hyphal tip via She3; rat catheter and Spider biofilm induced	XP_719147.1 Sap5p [Candida albicans SC5314]	-	-	-	-	-	-	-
ncbi_3635724	1555	1642	830	553	62.119	58.933	33.129	21.398	60.526	27.2635	-1.15058	5.13e-09	5.36e-07	PLB2	PLB4.5	Phospholipase B; Hog1-induced; regulated by Ssn6; putative GPI-anchor; repressed during cell wall regeneration; clade-associated gene expression; Hap43-induced; rat catheter and Spider biofilm repressed	XP_722492.2 Plb4.5p [Candida albicans SC5314]	Metabolism	Lipid metabolism	ko00564//Glycerophospholipid metabolism	K13333	-	GO:0004620//phospholipase activity	GO:0009395//phospholipid catabolic process
ncbi_3642271	224	239	75	124	34.755	33.316	11.627	18.636	34.0355	15.1315	-1.16949	0.000353247	0.00699127	HNT2	HNT2	Putative dinucleoside triphosphate hydrolase; induced upon low-level peroxide stress	KHC86939.1 bis(5'-adenosyl)-triphosphatase [Candida albicans SC5314]	Metabolism;Metabolism	Global and overview maps;Nucleotide metabolism	ko01100//Metabolic pathways;ko00230//Purine metabolism	K01522;K01522	GO:0001650//fibrillar center;GO:0005575//cellular_component;GO:0005622//intracellular;GO:0005623//cell;GO:0005634//nucleus;GO:0005730//nucleolus;GO:0005737//cytoplasm;GO:0005739//mitochondrion;GO:0005829//cytosol;GO:0005886//plasma membrane;GO:0016020//membrane;GO:0031974//membrane-enclosed lumen;GO:0031981//nuclear lumen;GO:0043226//organelle;GO:0043227//membrane-bounded organelle;GO:0043228//no…	GO:0000166//nucleotide binding;GO:0001882//nucleoside binding;GO:0001883//purine nucleoside binding;GO:0003674//molecular_function;GO:0003824//catalytic activity;GO:0004081//bis(5'-nucleosyl)-tetraphosphatase (asymmetrical) activity;GO:0004551//nucleotide diphosphatase activity;GO:0005488//binding;GO:0005515//protein binding;GO:0005525//GTP binding;GO:0008796//bis(5'-nucleosyl)-tetraphosphatase a…	GO:0006139//nucleobase-containing compound metabolic process;GO:0006152//purine nucleoside catabolic process;GO:0006154//adenosine catabolic process;GO:0006163//purine nucleotide metabolic process;GO:0006259//DNA metabolic process;GO:0006260//DNA replication;GO:0006351//transcription, DNA-templated;GO:0006355//regulation of transcription, DNA-templated;GO:0006725//cellular aromatic compound metab…
ncbi_3648022	121	102	48	48	8.149	6.172	3.23	3.131	7.1605	3.1805	-1.17081	0.00159035	0.0210262	--	orf19.2227	Protein of unknown function; flow model biofilm induced; nitric oxide-repressed	XP_710371.2 hypothetical protein CAALFM_C206760CA [Candida albicans SC5314]	-	-	-	-	-	-	-
ncbi_3644863	6011	4842	2514	2024	349.499	252.939	146.052	113.992	301.219	130.022	-1.21206	1.39e-10	1.65e-08	ADE13	ADE13	Adenylosuccinate lyase; enzyme of adenine biosynthesis; soluble protein in hyphae; not induced during GCN response, in contrast to the S. cerevisiae ortholog; repressed by nitric oxide	XP_713495.1 adenylosuccinase [Candida albicans SC5314]	Metabolism;Metabolism;Metabolism;Metabolism	Global and overview maps;Global and overview maps;Nucleotide metabolism;Amino acid metabolism	ko01100//Metabolic pathways;ko01110//Biosynthesis of secondary metabolites;ko00230//Purine metabolism;ko00250//Alanine, aspartate and glutamate metabolism	K01756;K01756;K01756;K01756	GO:0005575//cellular_component;GO:0005622//intracellular;GO:0005623//cell;GO:0005737//cytoplasm;GO:0005829//cytosol;GO:0044424//intracellular part;GO:0044444//cytoplasmic part;GO:0044464//cell part	GO:0003674//molecular_function;GO:0003824//catalytic activity;GO:0004018//N6-(1,2-dicarboxyethyl)AMP AMP-lyase (fumarate-forming) activity;GO:0004056//argininosuccinate lyase activity;GO:0004333//fumarate hydratase activity;GO:0008797//aspartate ammonia-lyase activity;GO:0016829//lyase activity;GO:0016840//carbon-nitrogen lyase activity;GO:0016842//amidine-lyase activity;GO:0047472//3-carboxy-cis…	GO:0001666//response to hypoxia;GO:0006082//organic acid metabolic process;GO:0006091//generation of precursor metabolites and energy;GO:0006099//tricarboxylic acid cycle;GO:0006106//fumarate metabolic process;GO:0006139//nucleobase-containing compound metabolic process;GO:0006163//purine nucleotide metabolic process;GO:0006164//purine nucleotide biosynthetic process;GO:0006167//AMP biosynthetic …
ncbi_3646722	986	816	371	382	89.323	66.415	33.582	33.521	77.869	33.5515	-1.21467	2.52e-08	2.29e-06	cpr-c2	orf19.1340	Putative aldose reductase; protein level decreases in stationary phase cultures; Spider biofilm repressed	XP_711680.2 aldo-keto reductase superfamily protein [Candida albicans SC5314]	-	-	-	-	-	GO:0047834//D-threo-aldose 1-dehydrogenase activity	-
ncbi_3648225	162	199	59	84	11.756	12.974	4.278	5.904	12.365	5.091	-1.28024	0.00014255	0.00347925	--	orf19.9	Ortholog of C. dubliniensis CD36 : Cd36_32700, C. parapsilosis CDC317 : CPAR2_204280, C. auris B8441 : B9J08_000471 and Candida tenuis NRRL Y-1498 : CANTEDRAFT_113831	XP_710173.1 hypothetical protein CAALFM_CR07120CA [Candida albicans SC5314]	-	-	-	-	-	-	-
ncbi_3645732	9107	7957	3658	2986	270.067	212.001	108.388	85.773	241.034	97.0805	-1.31198	1.41e-13	2.3e-11	MIS1	MIS11	Predicted mitochondrial C1-tetrahydrofolate synthase precursor; putative protein of glycine catabolism; repressed by Efg1; fluconazole-induced; stationary phase enriched protein; rat catheter and Spider biofilm repressed	XP_712654.1 trifunctional formate-tetrahydrofolate ligase/methenyltetrahydrofolate cyclohydrolase/methylenetetrahydrofolate dehydrogenase [Candida albicans SC5314]	Metabolism;Metabolism	Global and overview maps;Metabolism of cofactors and vitamins	ko01100//Metabolic pathways;ko00670//One carbon pool by folate	K00288;K00288	-	GO:0004329//formate-tetrahydrofolate ligase activity;GO:0004488//methylenetetrahydrofolate dehydrogenase (NADP+) activity;GO:0005524//ATP binding	GO:0055114//oxidation-reduction process
ncbi_3643318	8127	7250	2725	3163	597.467	478.864	200.166	225.24	538.165	212.703	-1.33921	1.19e-11	1.68e-09	FTR1	FTR1	High-affinity iron permease; required for mouse virulence, low-iron growth; iron, amphotericin B, caspofungin, ciclopirox, Hog1p, Sef1p, Sfu1p, and Hap43p regulated; complements S. cerevisiae ftr1 iron transport; Hap43p-repressed	XP_715020.1 high-affinity iron permease [Candida albicans SC5314]	-	-	-	-	GO:0016020//membrane;GO:0033573//high-affinity iron permease complex	GO:0005381//iron ion transmembrane transporter activity	GO:0034755//iron ion transmembrane transport
ncbi_3635595	181	196	66	75	21.004	20.435	7.653	8.431	20.7195	8.042	-1.36536	1.37e-05	0.00052741	AIM2	orf19.4612	Protein with a dienelactone hydrolase domain; Hap43-repressed gene	XP_722684.1 hypothetical protein CAALFM_C401800WA [Candida albicans SC5314]	-	-	-	-	-	GO:0016787//hydrolase activity	-
ncbi_3641571	7676	5744	2766	2159	407.499	273.966	146.718	111.022	340.733	128.87	-1.40272	2.74e-12	3.95e-10	ERG11	ERG11	Lanosterol 14-alpha-demethylase; cytochrome P450 family; role in ergosterol biosynthesis; target of azole antifungals; may contribute to drug resistance; azole or flow model biofilm induced; drug treated biofilm induced; hypoxia regulated	XP_716761.1 sterol 14-demethylase [Candida albicans SC5314]	Metabolism;Metabolism;Metabolism	Global and overview maps;Global and overview maps;Lipid metabolism	ko01100//Metabolic pathways;ko01110//Biosynthesis of secondary metabolites;ko00100//Steroid biosynthesis	K05917;K05917;K05917	GO:0005575//cellular_component;GO:0005622//intracellular;GO:0005623//cell;GO:0005737//cytoplasm;GO:0005783//endoplasmic reticulum;GO:0005789//endoplasmic reticulum membrane;GO:0005886//plasma membrane;GO:0012505//endomembrane system;GO:0016020//membrane;GO:0016021//integral component of membrane;GO:0031090//organelle membrane;GO:0031224//intrinsic component of membrane;GO:0031984//organelle subco…	GO:0003674//molecular_function;GO:0003824//catalytic activity;GO:0004497//monooxygenase activity;GO:0005488//binding;GO:0005506//iron ion binding;GO:0008144//drug binding;GO:0008398//sterol 14-demethylase activity;GO:0016491//oxidoreductase activity;GO:0016705//oxidoreductase activity, acting on paired donors, with incorporation or reduction of molecular oxygen;GO:0016709//oxidoreductase activity…	GO:0001766//membrane raft polarization;GO:0001878//response to yeast;GO:0006066//alcohol metabolic process;GO:0006629//lipid metabolic process;GO:0006694//steroid biosynthetic process;GO:0006695//cholesterol biosynthetic process;GO:0006696//ergosterol biosynthetic process;GO:0008150//biological_process;GO:0008152//metabolic process;GO:0008202//steroid metabolic process;GO:0008203//cholesterol met…
ncbi_3645359	2418	1959	837	749	201.499	146.67	69.692	60.459	174.084	65.0755	-1.4196	7.2e-13	1.06e-10	SPCC1494.01	orf19.1306	Has domain(s) with predicted 2-oxoglutarate-dependent dioxygenase activity	XP_709947.2 hypothetical protein CAALFM_C403720CA [Candida albicans SC5314]	-	-	-	-	-	GO:0003674//molecular_function;GO:0003824//catalytic activity;GO:0016491//oxidoreductase activity	GO:0008150//biological_process;GO:0008152//metabolic process;GO:0055114//oxidation-reduction process
ncbi_3646398	295	175	106	64	21.801	11.62	7.827	4.581	16.7105	6.204	-1.42948	2.32e-05	0.000836886	FDH1	FDH1	Formate dehydrogenase; oxidizes formate to CO2; Mig1 regulated; induced by macrophages; fluconazole-repressed; repressed by Efg1 in yeast, not hyphal conditions; stationary phase enriched; rat catheter and Spider biofilm induced	XP_711984.1 formate dehydrogenase (NAD+) [Candida albicans SC5314]	Metabolism;Metabolism;Metabolism;Metabolism	Global and overview maps;Global and overview maps;Carbohydrate metabolism;Energy metabolism	ko01100//Metabolic pathways;ko01200//Carbon metabolism;ko00630//Glyoxylate and dicarboxylate metabolism;ko00680//Methane metabolism	K00122;K00122;K00122;K00122	-	GO:0004617//phosphoglycerate dehydrogenase activity;GO:0016616//oxidoreductase activity, acting on the CH-OH group of donors, NAD or NADP as acceptor;GO:0050661//NADP binding;GO:0051287//NAD binding	GO:0006564//L-serine biosynthetic process;GO:0055114//oxidation-reduction process
ncbi_3643443	302	260	100	100	13.881	10.737	4.592	4.452	12.309	4.522	-1.44468	2.27e-07	1.58e-05	Flna	ABP2	Putative alpha-actinin-like protein; induced by alpha pheromone in SpiderM medium	XP_714888.2 Abp2p [Candida albicans SC5314]	-	-	-	-	GO:0005575//cellular_component;GO:0005622//intracellular;GO:0005623//cell;GO:0005737//cytoplasm;GO:0005856//cytoskeleton;GO:0005938//cell cortex;GO:0012506//vesicle membrane;GO:0016020//membrane;GO:0030139//endocytic vesicle;GO:0030659//cytoplasmic vesicle membrane;GO:0030666//endocytic vesicle membrane;GO:0030670//phagocytic vesicle membrane;GO:0031090//organelle membrane;GO:0031410//cytoplasmic…	GO:0003674//molecular_function;GO:0005085//guanyl-nucleotide exchange factor activity;GO:0005088//Ras guanyl-nucleotide exchange factor activity;GO:0005089//Rho guanyl-nucleotide exchange factor activity;GO:0005096//GTPase activator activity;GO:0005488//binding;GO:0005515//protein binding;GO:0008047//enzyme activator activity;GO:0017016//Ras GTPase binding;GO:0017048//Rho GTPase binding;GO:001989…	GO:0006950//response to stress;GO:0007154//cell communication;GO:0007165//signal transduction;GO:0008150//biological_process;GO:0009267//cellular response to starvation;GO:0009605//response to external stimulus;GO:0009966//regulation of signal transduction;GO:0009987//cellular process;GO:0009991//response to extracellular stimulus;GO:0010646//regulation of cell communication;GO:0023051//regulatio…
ncbi_3647965	3542	4292	1303	1400	86.047	93.678	31.628	32.944	89.8625	32.286	-1.47681	9.88e-15	1.87e-12	ALS3	ALS3	Cell wall adhesin; epithelial adhesion, endothelial invasion; alleles vary in adhesiveness; immunoprotective in mice; binds SspB adhesin of S. gordonii in mixed biofilm; induced in/required for Spider biofilm; flow model biofilm repressed	XP_710435.2 Als3p [Candida albicans SC5314]	-	-	-	-	GO:0005575//cellular_component;GO:0005576//extracellular region;GO:0005618//cell wall;GO:0005623//cell;GO:0005886//plasma membrane;GO:0009277//fungal-type cell wall;GO:0009986//cell surface;GO:0016020//membrane;GO:0030312//external encapsulating structure;GO:0030445//yeast-form cell wall;GO:0030446//hyphal cell wall;GO:0031224//intrinsic component of membrane;GO:0031225//anchored component of mem…	GO:0003674//molecular_function;GO:0005488//binding;GO:0005515//protein binding;GO:0030984//kininogen binding;GO:0030985//high molecular weight kininogen binding;GO:0050839//cell adhesion molecule binding	GO:0006810//transport;GO:0006873//cellular ion homeostasis;GO:0006875//cellular metal ion homeostasis;GO:0006878//cellular copper ion homeostasis;GO:0006879//cellular iron ion homeostasis;GO:0006897//endocytosis;GO:0007155//cell adhesion;GO:0008150//biological_process;GO:0009405//pathogenesis;GO:0009987//cellular process;GO:0016192//vesicle-mediated transport;GO:0019725//cellular homeostasis;GO:0…
ncbi_3645348	1571	1331	455	541	80.804	61.507	23.383	26.954	71.1555	25.1685	-1.49936	1.25e-11	1.72e-09	PHO84	PHO84	High-affinity phosphate transporter; transcript regulated by white-opaque switch; Hog1, ciclopirox olamine or alkaline induced; caspofungin, stress repressed; required for normal TORC1 function	XP_713038.2 phosphate transporter [Candida albicans SC5314]	-	-	-	-	GO:0000322//storage vacuole;GO:0000323//lytic vacuole;GO:0000324//fungal-type vacuole;GO:0005575//cellular_component;GO:0005622//intracellular;GO:0005623//cell;GO:0005737//cytoplasm;GO:0005773//vacuole;GO:0005783//endoplasmic reticulum;GO:0005886//plasma membrane;GO:0005887//integral component of plasma membrane;GO:0012505//endomembrane system;GO:0016020//membrane;GO:0016021//integral component o…	GO:0003674//molecular_function;GO:0005215//transporter activity;GO:0005315//inorganic phosphate transmembrane transporter activity;GO:0005384//manganese ion transmembrane transporter activity;GO:0008028//monocarboxylic acid transmembrane transporter activity;GO:0008324//cation transmembrane transporter activity;GO:0008509//anion transmembrane transporter activity;GO:0015075//ion transmembrane tra…	GO:0000041//transition metal ion transport;GO:0006082//organic acid metabolic process;GO:0006793//phosphorus metabolic process;GO:0006797//polyphosphate metabolic process;GO:0006810//transport;GO:0006811//ion transport;GO:0006812//cation transport;GO:0006817//phosphate ion transport;GO:0006820//anion transport;GO:0006828//manganese ion transport;GO:0008150//biological_process;GO:0008152//metaboli…
ncbi_3635629	91	154	38	44	7.744	11.775	3.231	3.627	9.7595	3.429	-1.50902	0.000147214	0.00357865	NFYB3	HAP3	Predicted CCAAT-binding transcription factor that regulates respiration; Cap2-dependent induction in low iron; opaque specific, alkaline, ciclopirox olamine induced; regulated by Sef1, Sfu1, Hap43; Bcr1-regulated in RPMI a/a biofilms	XP_019330906.1 Hap3p [Candida albicans SC5314]	-	-	-	-	-	GO:0003677//DNA binding	-
ncbi_3636553	2787	2291	1029	673	146.022	107.845	53.869	34.156	126.933	44.0125	-1.52809	3.68e-13	5.86e-11	MEP3	MEP1	Ammonium permease; Mep1 more efficient permease than Mep2, Mep2 has additional regulatory role; 11 predicted transmembrane regions; low mRNA abundance; hyphal downregulated; flow model biofilm induced	XP_721693.1 ammonium permease [Candida albicans SC5314]	-	-	-	-	GO:0005575//cellular_component;GO:0005623//cell;GO:0005886//plasma membrane;GO:0005887//integral component of plasma membrane;GO:0016020//membrane;GO:0016021//integral component of membrane;GO:0031224//intrinsic component of membrane;GO:0031226//intrinsic component of plasma membrane;GO:0044425//membrane part;GO:0044459//plasma membrane part;GO:0044464//cell part;GO:0071944//cell periphery	GO:0003674//molecular_function;GO:0005215//transporter activity;GO:0005275//amine transmembrane transporter activity;GO:0008324//cation transmembrane transporter activity;GO:0008519//ammonium transmembrane transporter activity;GO:0015075//ion transmembrane transporter activity;GO:0015101//organic cation transmembrane transporter activity;GO:0015200//methylammonium transmembrane transporter activi…	GO:0006810//transport;GO:0006811//ion transport;GO:0006812//cation transport;GO:0008150//biological_process;GO:0015695//organic cation transport;GO:0015696//ammonium transport;GO:0015837//amine transport;GO:0015843//methylammonium transport;GO:0019755//one-carbon compound transport;GO:0034220//ion transmembrane transport;GO:0051179//localization;GO:0051234//establishment of localization;GO:005508…
ncbi_3641732	179	220	63	69	5.992	6.616	2.107	2.237	6.304	2.172	-1.53724	1.09e-06	6.24e-05	--	orf19.7380	Has domain(s) with predicted nucleic acid binding, nucleotide binding activity	RLP64277.1 hypothetical protein L150_03020 [Candida albicans Ca529L]	-	-	-	-	-	GO:0003676//nucleic acid binding	-
ncbi_3642627	2254	3072	660	1097	126.346	154.711	36.965	59.563	140.529	48.264	-1.54184	6.4e-09	6.57e-07	--	orf19.1964	Protein of unknown function; repressed by fluphenazine treatment; induced by benomyl treatment and in an RHE model; regulated by Nrg1, Tup1	KGU26300.1 putative protein of unknown function [Candida albicans P75063]	-	-	-	-	-	-	-
ncbi_3635182	82	114	31	33	17.058	21.306	6.443	6.65	19.182	6.5465	-1.55096	0.000186708	0.00434037	--	orf19.5860	Predicted ORF from Assembly 19; removed from Assembly 20; subsequently reinstated in Assembly 21 based on comparative genome analysis	KGU31240.1 hypothetical protein MGM_02867 [Candida albicans P75063]	-	-	-	-	GO:0016020//membrane;GO:0016021//integral component of membrane;GO:0019013//viral nucleocapsid;GO:0030176//integral component of endoplasmic reticulum membrane	GO:0003723//RNA binding;GO:0004190//aspartic-type endopeptidase activity;GO:0046873//metal ion transmembrane transporter activity	GO:0015031//protein transport;GO:0016485//protein processing;GO:0030001//metal ion transport;GO:0055085//transmembrane transport
ncbi_3637041	69	94	23	30	4.761	5.827	1.586	2.005	5.294	1.7955	-1.55997	0.000615178	0.0105189	NUP	NUP	Nucleoside permease; adenosine and guanosine are substrates, whereas cytidine, adenine, guanine, uridine, uracil are not; similar to a nucleoside permease of S. pombe; possibly processed by Kex2p	XP_721406.1 Nupp [Candida albicans SC5314]	-	-	-	-	-	GO:0003674//molecular_function;GO:0005215//transporter activity;GO:0005337//nucleoside transmembrane transporter activity;GO:0008324//cation transmembrane transporter activity;GO:0015075//ion transmembrane transporter activity;GO:0015077//monovalent inorganic cation transmembrane transporter activity;GO:0015078//hydrogen ion transmembrane transporter activity;GO:0015291//secondary active transmem…	GO:0006810//transport;GO:0006811//ion transport;GO:0006812//cation transport;GO:0008150//biological_process;GO:0015672//monovalent inorganic cation transport;GO:0015858//nucleoside transport;GO:0015931//nucleobase-containing compound transport;GO:0034220//ion transmembrane transport;GO:0051179//localization;GO:0051234//establishment of localization;GO:0055085//transmembrane transport;GO:0071702//…
ncbi_3638460	6715	7439	2281	2325	763.477	759.898	259.129	256.057	761.688	257.593	-1.56411	1.12e-18	3.39e-16	YDR090C	orf19.6720	P-Loop domain-containing protein of unknown function; transposon mutation affects filamentous growth; Spider biofilm induced	XP_719819.1 hypothetical protein CAALFM_C307670WA [Candida albicans SC5314]	-	-	-	-	GO:0005575//cellular_component;GO:0005623//cell;GO:0005886//plasma membrane;GO:0016020//membrane;GO:0016021//integral component of membrane;GO:0031224//intrinsic component of membrane;GO:0044425//membrane part;GO:0044464//cell part;GO:0071944//cell periphery	GO:0003674//molecular_function;GO:0005215//transporter activity;GO:0005342//organic acid transmembrane transporter activity;GO:0008509//anion transmembrane transporter activity;GO:0008514//organic anion transmembrane transporter activity;GO:0015075//ion transmembrane transporter activity;GO:0015171//amino acid transmembrane transporter activity;GO:0015174//basic amino acid transmembrane transport…	GO:0003333//amino acid transmembrane transport;GO:0006810//transport;GO:0006811//ion transport;GO:0006820//anion transport;GO:0006865//amino acid transport;GO:0008150//biological_process;GO:0015711//organic anion transport;GO:0015802//basic amino acid transport;GO:0015849//organic acid transport;GO:0034220//ion transmembrane transport;GO:0046942//carboxylic acid transport;GO:0051179//localization…
ncbi_3639300	155	103	49	35	14.51	8.663	4.583	3.174	11.5865	3.8785	-1.57887	4.68e-05	0.00142593	--	orf19.6079	Predicted ORF in retrotransposon Tca8 with similarity to the Gag region encoding nucleocapsid-like protein; repressed by ciclopirox olamine; filament induced; regulated by Rfg1, Tup1; overlaps orf19.6078.1	XP_719041.2 hypothetical protein CAALFM_C100270WA, partial [Candida albicans SC5314]	-	-	-	-	-	-	-
ncbi_3638791	16166	16258	5117	5315	1282.47	1158.78	405.602	408.423	1220.62	407.012	-1.58447	2.4e-19	8.25e-17	CHA1	CHA1	Similar to catabolic ser/thr dehydratases; repressed by Rim101; induced in low iron; regulated on white-opaque switch; filament induced; Tn mutation affects filamentation; flow model biofilm induced; Spider biofilm repressed	XP_719447.2 Cha1p [Candida albicans SC5314]	Metabolism;Metabolism;Metabolism;Metabolism;Metabolism;Metabolism;Metabolism	Global and overview maps;Global and overview maps;Global and overview maps;Global and overview maps;Amino acid metabolism;Amino acid metabolism;Amino acid metabolism	ko01100//Metabolic pathways;ko01110//Biosynthesis of secondary metabolites;ko01230//Biosynthesis of amino acids;ko01200//Carbon metabolism;ko00270//Cysteine and methionine metabolism;ko00260//Glycine, serine and threonine metabolism;ko00290//Valine, leucine and isoleucine biosynthesis	K17989;K17989;K17989;K17989;K17989;K17989;K17989	-	GO:0004122//cystathionine beta-synthase activity;GO:0004124//cysteine synthase activity;GO:0004794//L-threonine ammonia-lyase activity;GO:0004795//threonine synthase activity;GO:0004834//tryptophan synthase activity;GO:0008838//diaminopropionate ammonia-lyase activity;GO:0030170//pyridoxal phosphate binding	GO:0000162//tryptophan biosynthetic process;GO:0006535//cysteine biosynthetic process from serine;GO:0006549//isoleucine metabolic process;GO:0008152//metabolic process;GO:0009058//biosynthetic process;GO:0009088//threonine biosynthetic process;GO:0009097//isoleucine biosynthetic process;GO:0019344//cysteine biosynthetic process;GO:0042400//ectoine catabolic process
ncbi_3646841	13838	12257	4260	4061	549.669	437.424	169.075	156.251	493.546	162.663	-1.6013	2.34e-19	8.25e-17	CFL1	FRE10	Major cell-surface ferric reductase under low-iron conditions; 7 transmembrane regions and a secretion signal predicted; Tup1, Rim101, Ssn6, Hog1, caspofungin repressed; ciclopirox olamine induced; rat catheter biofilm induced	XP_711543.1 Fre10p [Candida albicans SC5314]	-	-	-	-	-	GO:0016491//oxidoreductase activity;GO:0016655//oxidoreductase activity, acting on NAD(P)H, quinone or similar compound as acceptor	GO:0006814//sodium ion transport;GO:0055114//oxidation-reduction process
ncbi_3639172	8198	6642	2466	2273	582.851	424.267	175.18	156.536	503.559	165.858	-1.60221	2.51e-17	7.24e-15	GCV1	GCV1	Putative T subunit of glycine decarboxylase; transcript negatively regulated by Sfu1; Spider biofilm repressed	XP_719084.2 glycine decarboxylase subunit T [Candida albicans SC5314]	Metabolism;Metabolism;Metabolism;Metabolism;Metabolism;Metabolism	Global and overview maps;Global and overview maps;Global and overview maps;Amino acid metabolism;Carbohydrate metabolism;Metabolism of cofactors and vitamins	ko01100//Metabolic pathways;ko01110//Biosynthesis of secondary metabolites;ko01200//Carbon metabolism;ko00260//Glycine, serine and threonine metabolism;ko00630//Glyoxylate and dicarboxylate metabolism;ko00670//One carbon pool by folate	K00605;K00605;K00605;K00605;K00605;K00605	GO:0005575//cellular_component;GO:0005576//extracellular region;GO:0005622//intracellular;GO:0005623//cell;GO:0005634//nucleus;GO:0005654//nucleoplasm;GO:0005737//cytoplasm;GO:0005739//mitochondrion;GO:0005740//mitochondrial envelope;GO:0005743//mitochondrial inner membrane;GO:0005759//mitochondrial matrix;GO:0005829//cytosol;GO:0005840//ribosome;GO:0005960//glycine cleavage complex;GO:0009507//c…	GO:0003674//molecular_function;GO:0003824//catalytic activity;GO:0004047//aminomethyltransferase activity;GO:0005488//binding;GO:0005504//fatty acid binding;GO:0008168//methyltransferase activity;GO:0008289//lipid binding;GO:0008483//transaminase activity;GO:0016740//transferase activity;GO:0016741//transferase activity, transferring one-carbon groups;GO:0016769//transferase activity, transferrin…	GO:0001505//regulation of neurotransmitter levels;GO:0006082//organic acid metabolic process;GO:0006520//cellular amino acid metabolic process;GO:0006544//glycine metabolic process;GO:0006546//glycine catabolic process;GO:0006730//one-carbon metabolic process;GO:0006807//nitrogen compound metabolic process;GO:0008150//biological_process;GO:0008152//metabolic process;GO:0009056//catabolic process;…
ncbi_3644915	170	144	63	36	5.137	3.913	1.904	1.053	4.525	1.4785	-1.61378	5.33e-06	0.000235413	OPT2	OPT2	Oligopeptide transporter; induced upon phagocytosis by macrophage; macrophage/pseudohyphal-repressed after 16h; fluconazole-induced; virulence-group-correlated expression; Hap43-repressed	XP_713434.1 Opt2p [Candida albicans SC5314]	-	-	-	-	-	GO:0015198//oligopeptide transporter activity	GO:0055085//transmembrane transport
ncbi_3646505	16194	13645	5120	4182	454.78	344.28	143.667	113.761	399.53	128.714	-1.63413	2.45e-19	8.25e-17	GCV2	GCV2	Glycine decarboxylase P subunit; protein of glycine catabolism; repressed by Efg1; Hog1-induced; induced by Rim101 at acid pH; transcript induced in elevated CO2; stationary phase enriched protein	XP_711873.1 glycine decarboxylase subunit P [Candida albicans SC5314]	Metabolism;Metabolism;Metabolism;Metabolism;Metabolism	Global and overview maps;Global and overview maps;Global and overview maps;Amino acid metabolism;Carbohydrate metabolism	ko01100//Metabolic pathways;ko01110//Biosynthesis of secondary metabolites;ko01200//Carbon metabolism;ko00260//Glycine, serine and threonine metabolism;ko00630//Glyoxylate and dicarboxylate metabolism	K00281;K00281;K00281;K00281;K00281	GO:0005575//cellular_component;GO:0005622//intracellular;GO:0005623//cell;GO:0005634//nucleus;GO:0005737//cytoplasm;GO:0005739//mitochondrion;GO:0005759//mitochondrial matrix;GO:0005886//plasma membrane;GO:0005960//glycine cleavage complex;GO:0016020//membrane;GO:0031974//membrane-enclosed lumen;GO:0032991//macromolecular complex;GO:0043226//organelle;GO:0043227//membrane-bounded organelle;GO:004…	GO:0003674//molecular_function;GO:0003824//catalytic activity;GO:0004375//glycine dehydrogenase (decarboxylating) activity;GO:0004837//tyrosine decarboxylase activity;GO:0005488//binding;GO:0005515//protein binding;GO:0008144//drug binding;GO:0009055//electron carrier activity;GO:0016491//oxidoreductase activity;GO:0016594//glycine binding;GO:0016597//amino acid binding;GO:0016638//oxidoreductase…	GO:0001101//response to acid chemical;GO:0001505//regulation of neurotransmitter levels;GO:0006082//organic acid metabolic process;GO:0006091//generation of precursor metabolites and energy;GO:0006520//cellular amino acid metabolic process;GO:0006544//glycine metabolic process;GO:0006546//glycine catabolic process;GO:0006730//one-carbon metabolic process;GO:0006807//nitrogen compound metabolic pr…
ncbi_3648193	117	122	31	43	4.032	3.777	1.067	1.435	3.9045	1.251	-1.64206	3.28e-05	0.00108519	--	orf19.6282	Ortholog of C. dubliniensis CD36 : Cd36_33320, C. parapsilosis CDC317 : CPAR2_701970, C. auris B8441 : B9J08_000885 and Candida tenuis NRRL Y-1498 : CANTEDRAFT_116124	XP_710208.2 hypothetical protein CAALFM_CR07680CA [Candida albicans SC5314]	-	-	-	-	-	GO:0003676//nucleic acid binding	-
ncbi_3646621	1124	1266	364	366	51.761	52.354	16.728	16.331	52.0575	16.5295	-1.65506	2.48e-16	6e-14	SEO1	SEO1	Protein with similarity to permeases; Sfu1-repressed; flucytosine induced; induced by Mnl1 under weak acid stress; flow model biofilm repressed	XP_711773.2 putative permease [Candida albicans SC5314]	-	-	-	-	-	GO:0022857//transmembrane transporter activity	GO:0055085//transmembrane transport
ncbi_3637706	177	157	46	53	13.924	11.096	3.616	4.038	12.51	3.827	-1.7088	7.65e-07	4.58e-05	--	SUT1	Zn2Cys6 transcription factor involved in sterol uptake; flow model biofilm induced; Spider biofilm repressed	XP_720647.2 Sut1p [Candida albicans SC5314]	-	-	-	-	-	GO:0000981//RNA polymerase II transcription factor activity, sequence-specific DNA binding;GO:0008270//zinc ion binding	GO:0006355//regulation of transcription, DNA-templated
ncbi_3647151	922	948	273	268	41.762	38.579	12.355	11.759	40.1705	12.057	-1.73627	7.87e-17	2.07e-14	FET3	FET31	Putative multicopper oxidase; ketoconazole/caspofungin/amphotericin B repressed; Sef1/Sfu1/Hap43 regulated; reports differ if functional homolog of ScFet3; rat catheter and Spider biofilm induced	XP_711263.2 Fet31p [Candida albicans SC5314]	-	-	-	-	-	GO:0005375//copper ion transmembrane transporter activity;GO:0005507//copper ion binding;GO:0016491//oxidoreductase activity	GO:0006825//copper ion transport;GO:0055114//oxidation-reduction process
ncbi_3644017	2886	3017	887	781	142.44	133.783	43.742	37.338	138.112	40.54	-1.76842	2.57e-23	1.2e-20	CAN2	CAN2	Basic amino acid permease; arginine metabolism; regulated by Nrg1/Tup1; caspofungin, flucytosine induced; colony morphology-related regulation by Ssn6; Hap43-repressed; rat catheter and Spider biofilm induced; promoter bound by Efg1	XP_714319.1 arginine permease [Candida albicans SC5314]	-	-	-	-	GO:0016020//membrane;GO:0016021//integral component of membrane	GO:0015171//amino acid transmembrane transporter activity;GO:0015495//gamma-aminobutyric acid:proton symporter activity;GO:0022857//transmembrane transporter activity	GO:0006810//transport;GO:0006865//amino acid transport;GO:0009450//gamma-aminobutyric acid catabolic process;GO:0055085//transmembrane transport
ncbi_3637993	2798	2676	799	742	133.862	115.023	38.194	34.386	124.442	36.29	-1.77784	2.45e-22	1.06e-19	FRE7	orf19.7077	Putative ferric reductase; induced by Mac1 under copper starvation; Plc1-regulated; Rim101-repressed	XP_720368.1 putative ferric-chelate reductase [Candida albicans SC5314]	-	-	-	-	GO:0005575//cellular_component;GO:0005623//cell;GO:0005886//plasma membrane;GO:0016020//membrane;GO:0016021//integral component of membrane;GO:0031224//intrinsic component of membrane;GO:0044425//membrane part;GO:0044464//cell part;GO:0071944//cell periphery	GO:0000293//ferric-chelate reductase activity;GO:0003674//molecular_function;GO:0003824//catalytic activity;GO:0005488//binding;GO:0009055//electron carrier activity;GO:0016002//sulfite reductase activity;GO:0016491//oxidoreductase activity;GO:0016722//oxidoreductase activity, oxidizing metal ions;GO:0016723//oxidoreductase activity, oxidizing metal ions, NAD or NADP as acceptor;GO:0043167//ion b…	GO:0000041//transition metal ion transport;GO:0006790//sulfur compound metabolic process;GO:0006810//transport;GO:0006811//ion transport;GO:0006812//cation transport;GO:0006825//copper ion transport;GO:0006826//iron ion transport;GO:0008150//biological_process;GO:0008152//metabolic process;GO:0015677//copper ion import;GO:0030001//metal ion transport;GO:0042592//homeostatic process;GO:0048878//ch…
ncbi_3643531	47	61	10	20	2.543	2.966	0.541	1.048	2.7545	0.7945	-1.79367	0.0020071	0.0249466	--	orf19.2253	Protein of unknown function; expression regulated by white-opaque switch; repressed by alpha pheromone in SpiderM medium; Spider biofilm induced	XP_714843.1 hypothetical protein CAALFM_C206990WA [Candida albicans SC5314]	-	-	-	-	-	-	-
ncbi_3635185	54	49	11	17	8.766	7.146	1.784	2.673	7.956	2.2285	-1.83597	0.00147521	0.0201127	--	orf19.5863	Ortholog of C. dubliniensis CD36 : Cd36_84160, C. auris B8441 : B9J08_001714, Candida tenuis NRRL Y-1498 : cten_CGOB_00085 and Debaryomyces hansenii CBS767 : DEHA2B08404g	XP_723079.2 hypothetical protein CAALFM_C304210WA [Candida albicans SC5314]	-	-	-	-	-	GO:0004363//glutathione synthase activity	GO:0006750//glutathione biosynthetic process
ncbi_3646024	2751	2924	766	681	191.23	182.614	53.203	45.854	186.922	49.5285	-1.91611	1.43e-26	9.61e-24	CFL1	FRE7	Copper-regulated cupric reductase; repressed by ciclopirox olamine or 17-beta-estradiol; induced by alkaline conditions or interaction with macrophage; Spider biofilm induced	XP_712346.2 Fre7p [Candida albicans SC5314]	-	-	-	-	-	GO:0016491//oxidoreductase activity;GO:0016655//oxidoreductase activity, acting on NAD(P)H, quinone or similar compound as acceptor	GO:0006814//sodium ion transport;GO:0055114//oxidation-reduction process
ncbi_3639299	774	793	169	230	33.236	30.594	7.251	9.567	31.915	8.409	-1.92423	1.05e-14	1.92e-12	TY3B-G	POL93	Predicted ORF in retrotransposon Tca8 with similarity to the Pol region of retrotransposons encoding reverse transcriptase, protease and integrase; downregulated in response to ciclopirox olamine; F-12/CO2 early biofilm induced	XP_719040.2 Pol93p [Candida albicans SC5314]	-	-	-	-	-	GO:0003964//RNA-directed DNA polymerase activity	GO:0000373//Group II intron splicing
ncbi_3643909	884	994	195	276	122.899	124.157	27.088	37.168	123.528	32.128	-1.94294	6.78e-15	1.32e-12	PST2	PST2	Flavodoxin-like protein involved in oxidative stress protection and virulence; putative NADH:quinone oxidoreductase; similar to 1,4-benzoquinone reductase; induced by benomyl, oxidative stress via Cap1; fungal-specific	XP_714456.1 Pst2p [Candida albicans SC5314]	Metabolism;Metabolism;Metabolism	Global and overview maps;Global and overview maps;Metabolism of cofactors and vitamins	ko01100//Metabolic pathways;ko01110//Biosynthesis of secondary metabolites;ko00130//Ubiquinone and other terpenoid-quinone biosynthesis	K03809;K03809;K03809	-	GO:0003955//NAD(P)H dehydrogenase (quinone) activity;GO:0009055//electron carrier activity;GO:0016491//oxidoreductase activity	GO:0055114//oxidation-reduction process
ncbi_3645891	54	96	18	19	4.033	6.442	1.343	1.375	5.2375	1.359	-1.94633	0.000113048	0.00285116	--	orf19.6919	Ortholog of C. dubliniensis CD36 : Cd36_71210, C. parapsilosis CDC317 : CPAR2_702710, C. auris B8441 : B9J08_002141 and Candida tenuis NRRL Y-1498 : CANTEDRAFT_116256	KGR06553.1 hypothetical protein MG3_04920 [Candida albicans P78048]	-	-	-	-	-	-	-
ncbi_3645009	1729	2358	382	632	193.45	237.033	42.705	68.497	215.242	55.601	-1.95277	3.83e-13	5.94e-11	PGA10	PGA10	GPI anchored membrane protein; utilization of hemin and hemoglobin for Fe in host; Rim101 at ph8/hypoxia/ketoconazole/ciclopirox/hypha-induced; required for RPMI biofilm formation, Bcr1-induced in a/a biofilm; rat catheter biofilm repressed	KGR09821.1 hypothetical protein MG3_03324 [Candida albicans P78048]	-	-	-	-	GO:0005575//cellular_component;GO:0005576//extracellular region;GO:0005618//cell wall;GO:0005623//cell;GO:0005886//plasma membrane;GO:0009277//fungal-type cell wall;GO:0016020//membrane;GO:0016021//integral component of membrane;GO:0030312//external encapsulating structure;GO:0031224//intrinsic component of membrane;GO:0031225//anchored component of membrane;GO:0044425//membrane part;GO:0044464//…	GO:0003674//molecular_function;GO:0005219//ryanodine-sensitive calcium-release channel activity;GO:0005488//binding;GO:0020037//heme binding;GO:0046872//metal ion binding;GO:0046906//tetrapyrrole binding;GO:0048037//cofactor binding;GO:0097159//organic cyclic compound binding;GO:1901363//heterocyclic compound binding	GO:0006810//transport;GO:0006873//cellular ion homeostasis;GO:0006874//cellular calcium ion homeostasis;GO:0006875//cellular metal ion homeostasis;GO:0006879//cellular iron ion homeostasis;GO:0006897//endocytosis;GO:0006898//receptor-mediated endocytosis;GO:0008104//protein localization;GO:0008150//biological_process;GO:0009987//cellular process;GO:0015031//protein transport;GO:0015833//peptide t…
ncbi_3647077	13694	14732	3498	3547	1526.08	1475.02	389.5	382.888	1500.55	386.194	-1.95809	4.74e-29	4.1e-26	CTR1	CTR1	Copper transporter; transcribed in low copper; induced Mac1, Tye7, macrophage interaction, alkaline pH via Rim101; 17-beta-estradiol repressed; complements S. cerevisiae ctr1 ctr3 copper transport mutant; flow model/Spider biofilm induced	KHC58205.1 hypothetical protein MGE_04541 [Candida albicans P75010]	-	-	-	-	GO:0000178//exosome (RNase complex);GO:0005575//cellular_component;GO:0005622//intracellular;GO:0005623//cell;GO:0005634//nucleus;GO:0005737//cytoplasm;GO:0005886//plasma membrane;GO:0016020//membrane;GO:0016021//integral component of membrane;GO:0031224//intrinsic component of membrane;GO:0043226//organelle;GO:0043227//membrane-bounded organelle;GO:0043229//intracellular organelle;GO:0043231//in…	GO:0003674//molecular_function;GO:0003723//RNA binding;GO:0005215//transporter activity;GO:0005375//copper ion transmembrane transporter activity;GO:0008324//cation transmembrane transporter activity;GO:0015075//ion transmembrane transporter activity;GO:0015318//inorganic solute uptake transmembrane transporter activity;GO:0022857//transmembrane transporter activity;GO:0022890//inorganic cation t…	GO:0000041//transition metal ion transport;GO:0006810//transport;GO:0006811//ion transport;GO:0006812//cation transport;GO:0006825//copper ion transport;GO:0008150//biological_process;GO:0015677//copper ion import;GO:0030001//metal ion transport;GO:0034220//ion transmembrane transport;GO:0035434//copper ion transmembrane transport;GO:0051179//localization;GO:0051234//establishment of localization…
ncbi_3644918	3580	3554	1016	727	110.985	98.987	31.452	21.828	104.986	26.64	-1.97853	5.8e-26	3.51e-23	OPT2	OPT3	Oligopeptide transporter; transcript induced by macrophage phagocytosis, BSA or peptides; fluconazole-induced; induced by Rim101 at pH 8; virulence-group-correlated expression; Hap43-repressed; Spider biofilm induced	XP_713437.1 Opt3p [Candida albicans SC5314]	-	-	-	-	-	GO:0015198//oligopeptide transporter activity	GO:0055085//transmembrane transport
ncbi_3647697	800	731	210	160	61.245	50.28	16.083	11.859	55.7625	13.971	-1.99686	6.02e-19	1.92e-16	OPT2	OPT4	Oligopeptide transporter; detected at germ tube plasma membrane; transcript inducede during phagocytosis by macrophages; fungal-specific; Hap43-repressed; merged with orf19.2292 in Assembly 20; rat catheter and Spider biofilm induced	KHC61278.1 OPT family small oligopeptide transporter [Candida albicans P75016]	-	-	-	-	-	GO:0015198//oligopeptide transporter activity	GO:0055085//transmembrane transport
ncbi_3643662	230	279	60	60	10.966	11.952	2.858	2.771	11.459	2.8145	-2.02553	2.3e-11	3.03e-09	GAP2	GAP2	General broad specificity amino acid permease; ketoconazole, flucytosine repressed; Ssy1-dependent histidine induction; regulated by Nrg1, Tup1; colony morphology-related gene regulation by Ssn6; Spider and flow model biofilm induced	XP_714699.1 amino acid permease [Candida albicans SC5314]	-	-	-	-	GO:0000322//storage vacuole;GO:0000323//lytic vacuole;GO:0000324//fungal-type vacuole;GO:0000328//fungal-type vacuole lumen;GO:0005575//cellular_component;GO:0005622//intracellular;GO:0005623//cell;GO:0005737//cytoplasm;GO:0005739//mitochondrion;GO:0005768//endosome;GO:0005770//late endosome;GO:0005771//multivesicular body;GO:0005773//vacuole;GO:0005775//vacuolar lumen;GO:0005783//endoplasmic ret…	GO:0003674//molecular_function;GO:0005215//transporter activity;GO:0005342//organic acid transmembrane transporter activity;GO:0008324//cation transmembrane transporter activity;GO:0008509//anion transmembrane transporter activity;GO:0008514//organic anion transmembrane transporter activity;GO:0015075//ion transmembrane transporter activity;GO:0015171//amino acid transmembrane transporter activit…	GO:0003333//amino acid transmembrane transport;GO:0006810//transport;GO:0006811//ion transport;GO:0006812//cation transport;GO:0006820//anion transport;GO:0006855//drug transmembrane transport;GO:0006865//amino acid transport;GO:0008150//biological_process;GO:0009450//gamma-aminobutyric acid catabolic process;GO:0015711//organic anion transport;GO:0015801//aromatic amino acid transport;GO:0015804…
ncbi_3646158	171	137	30	43	20.348	14.647	3.567	4.956	17.4975	4.2615	-2.03772	1.41e-07	1.03e-05	STUB1	orf19.6864	Putative ubiquitin-protein ligase; role in protein ubiquitination; Spider biofilm induced	KGQ96145.1 STIP1 homology and U-box containing protein 1 [Candida albicans GC75]	Genetic Information Processing;Genetic Information Processing	Folding, sorting and degradation;Folding, sorting and degradation	ko04141//Protein processing in endoplasmic reticulum;ko04120//Ubiquitin mediated proteolysis	K09561;K09561	GO:0000151//ubiquitin ligase complex;GO:0005575//cellular_component;GO:0005622//intracellular;GO:0005623//cell;GO:0005634//nucleus;GO:0005654//nucleoplasm;GO:0005737//cytoplasm;GO:0005783//endoplasmic reticulum;GO:0005829//cytosol;GO:0012505//endomembrane system;GO:0016234//inclusion body;GO:0030016//myofibril;GO:0030017//sarcomere;GO:0030018//Z disc;GO:0031371//ubiquitin conjugating enzyme compl…	GO:0001664//G-protein coupled receptor binding;GO:0003674//molecular_function;GO:0003824//catalytic activity;GO:0004842//ubiquitin-protein transferase activity;GO:0005102//receptor binding;GO:0005488//binding;GO:0005515//protein binding;GO:0008270//zinc ion binding;GO:0016740//transferase activity;GO:0019787//ubiquitin-like protein transferase activity;GO:0019899//enzyme binding;GO:0019900//kinas…	GO:0000003//reproduction;GO:0000209//protein polyubiquitination;GO:0001666//response to hypoxia;GO:0002931//response to ischemia;GO:0006139//nucleobase-containing compound metabolic process;GO:0006259//DNA metabolic process;GO:0006281//DNA repair;GO:0006457//protein folding;GO:0006464//cellular protein modification process;GO:0006508//proteolysis;GO:0006511//ubiquitin-dependent protein catabolic …
ncbi_3638401	178	151	43	34	9.505	7.25	2.285	1.775	8.3775	2.03	-2.04504	9.27e-09	9.05e-07	DAL5	DAL5	Allantoate permease; nitrogen catabolite repressed, induced in absence of preferred N sources; nitrogen source regulation requires Gat1; possibly essential gene (by UAU1 method); Hap43-repressed	XP_720004.1 allantoate permease [Candida albicans SC5314]	-	-	-	-	-	GO:0022857//transmembrane transporter activity	GO:0055085//transmembrane transport
ncbi_3642994	730	780	141	197	28.874	27.719	5.572	7.548	28.2965	6.56	-2.10886	1.34e-16	3.38e-14	AMO	AMO1	Putative peroxisomal copper amine oxidase	XP_715325.1 Amo1p [Candida albicans SC5314]	Metabolism;Metabolism;Metabolism;Metabolism;Metabolism;Metabolism	Global and overview maps;Global and overview maps;Amino acid metabolism;Amino acid metabolism;Metabolism of other amino acids;Amino acid metabolism	ko01100//Metabolic pathways;ko01110//Biosynthesis of secondary metabolites;ko00260//Glycine, serine and threonine metabolism;ko00350//Tyrosine metabolism;ko00410//beta-Alanine metabolism;ko00360//Phenylalanine metabolism	K00276;K00276;K00276;K00276;K00276;K00276	-	GO:0005507//copper ion binding;GO:0008131//primary amine oxidase activity;GO:0048038//quinone binding	GO:0006325//chromatin organization;GO:0009308//amine metabolic process;GO:0055114//oxidation-reduction process
ncbi_3644589	51	27	8	9	4.314	2.052	0.676	0.737	3.183	0.7065	-2.17163	0.0018893	0.0239747	HSP30	HSP31	Putative 30 kda heat shock protein; repressed during the mating process; rat catheter biofilm induced	XP_713758.1 Hsp31p [Candida albicans SC5314]	-	-	-	-	GO:0016020//membrane	GO:0005216//ion channel activity	GO:0006811//ion transport
ncbi_3646025	1505	1566	332	297	147.266	137.673	32.46	28.15	142.47	30.305	-2.23303	3.04e-30	3.07e-27	CFL1	FRE30	Protein with similarity to ferric reductases; downregulated in response to amphotericin B, estradiol, or ciclopirox olamine, and upregulated by interaction with macrophage; un-merged from orf19.6139 in a revision of Assembly 21	XP_712347.2 Fre30p [Candida albicans SC5314]	-	-	-	-	-	GO:0016491//oxidoreductase activity	GO:0055114//oxidation-reduction process
ncbi_30515347	7314	12280	1405	2490	992.274	1496.81	190.456	327.22	1244.54	258.838	-2.26549	0.000100192	0.00261405	DEHA2E01232g	SOD3	Cytosolic manganese-containing superoxide dismutase; protects against oxidative stress; repressed by ciclopirox olamine, induced during stationary phase when SOD1 expression is low; Hap43-repressed; Spider and flow model biofilm induced	XP_019331017.1 Sod3p [Candida albicans SC5314]	Cellular Processes;Organismal Systems	Transport and catabolism;Aging	ko04146//Peroxisome;ko04213//Longevity regulating pathway - multiple species	K04564;K04564	GO:0005575//cellular_component;GO:0005622//intracellular;GO:0005623//cell;GO:0005737//cytoplasm;GO:0005739//mitochondrion;GO:0005759//mitochondrial matrix;GO:0031974//membrane-enclosed lumen;GO:0043226//organelle;GO:0043227//membrane-bounded organelle;GO:0043229//intracellular organelle;GO:0043231//intracellular membrane-bounded organelle;GO:0043233//organelle lumen;GO:0044422//organelle part;GO:…	GO:0003674//molecular_function;GO:0003824//catalytic activity;GO:0004784//superoxide dismutase activity;GO:0005488//binding;GO:0016209//antioxidant activity;GO:0016491//oxidoreductase activity;GO:0016721//oxidoreductase activity, acting on superoxide radicals as acceptor;GO:0043167//ion binding;GO:0043169//cation binding;GO:0046872//metal ion binding	GO:0000302//response to reactive oxygen species;GO:0000303//response to superoxide;GO:0000305//response to oxygen radical;GO:0006801//superoxide metabolic process;GO:0006950//response to stress;GO:0006979//response to oxidative stress;GO:0008150//biological_process;GO:0008152//metabolic process;GO:0009636//response to toxic substance;GO:0009987//cellular process;GO:0010035//response to inorganic …
ncbi_3641539	34	28	9	2	1.981	1.466	0.524	0.113	1.7235	0.3185	-2.43598	0.00229534	0.0270833	--	orf19.938	Ortholog of C. dubliniensis CD36 : Cd36_50520, C. parapsilosis CDC317 : CPAR2_304000, C. auris B8441 : B9J08_000441 and Candida tenuis NRRL Y-1498 : cten_CGOB_00233	XP_716777.1 hypothetical protein CAALFM_C500510WA [Candida albicans SC5314]	-	-	-	-	-	GO:0004496//mevalonate kinase activity	GO:0016126//sterol biosynthetic process;GO:0019287//isopentenyl diphosphate biosynthetic process, mevalonate pathway
ncbi_3648086	10975	9454	1861	1648	674.428	521.96	114.266	98.096	598.194	106.181	-2.49409	2.4e-42	4.85e-39	GDHA	GDH3	NADP-glutamate dehydrogenase; Nrg1, Plc1 regulated; hypha, hypoxia, Efg1-repressed; Rim101-induced at pH 8; GlcNAc, ciclopirox, ketoconazole induced; exp and stationary phase protein; Spider biofilm repressed; rat catheter biofilm induced	XP_710311.1 glutamate dehydrogenase (NADP(+)) [Candida albicans SC5314]	Metabolism;Metabolism;Metabolism;Metabolism	Global and overview maps;Amino acid metabolism;Amino acid metabolism;Energy metabolism	ko01100//Metabolic pathways;ko00250//Alanine, aspartate and glutamate metabolism;ko00220//Arginine biosynthesis;ko00910//Nitrogen metabolism	K00262;K00262;K00262;K00262	GO:0005575//cellular_component;GO:0005576//extracellular region;GO:0005622//intracellular;GO:0005623//cell;GO:0005634//nucleus;GO:0005737//cytoplasm;GO:0005739//mitochondrion;GO:0005829//cytosol;GO:0043226//organelle;GO:0043227//membrane-bounded organelle;GO:0043229//intracellular organelle;GO:0043231//intracellular membrane-bounded organelle;GO:0044424//intracellular part;GO:0044444//cytoplasmic…	GO:0003674//molecular_function;GO:0003677//DNA binding;GO:0003678//DNA helicase activity;GO:0003824//catalytic activity;GO:0004353//glutamate dehydrogenase [NAD(P)+] activity;GO:0004354//glutamate dehydrogenase (NADP+) activity;GO:0005524//ATP binding;GO:0016491//oxidoreductase activity;GO:0016638//oxidoreductase activity, acting on the CH-NH2 group of donors;GO:0016639//oxidoreductase activity, …	GO:0000746//conjugation;GO:0001505//regulation of neurotransmitter levels;GO:0006082//organic acid metabolic process;GO:0006520//cellular amino acid metabolic process;GO:0006536//glutamate metabolic process;GO:0006537//glutamate biosynthetic process;GO:0006541//glutamine metabolic process;GO:0006807//nitrogen compound metabolic process;GO:0008150//biological_process;GO:0008152//metabolic process;…
ncbi_3646723	952	831	170	132	83.809	65.728	14.954	11.256	74.7685	13.105	-2.51231	4.51e-28	3.41e-25	TSSK2	PRR2	Putative serine/threonine protein kinase; mutation confers resistance to 5-fluorocytosine	XP_711681.2 Prr2p [Candida albicans SC5314]	Organismal Systems	Aging	ko04213//Longevity regulating pathway - multiple species	K07198	-	GO:0004672//protein kinase activity;GO:0005524//ATP binding	GO:0006468//protein phosphorylation
ncbi_3646562	289	110	27	42	15.608	5.337	1.457	2.197	10.4725	1.827	-2.51906	5.15e-08	4.21e-06	GIT1	GIT1	Glycerophosphoinositol permease; involved in utilization of glycerophosphoinositol as a phosphate source; Rim101-repressed; virulence-group-correlated expression	XP_711841.1 Git1p [Candida albicans SC5314]	-	-	-	-	GO:0000322//storage vacuole;GO:0000323//lytic vacuole;GO:0000324//fungal-type vacuole;GO:0005575//cellular_component;GO:0005622//intracellular;GO:0005623//cell;GO:0005737//cytoplasm;GO:0005773//vacuole;GO:0005886//plasma membrane;GO:0005887//integral component of plasma membrane;GO:0016020//membrane;GO:0016021//integral component of membrane;GO:0031224//intrinsic component of membrane;GO:0031226/…	GO:0001406//glycerophosphodiester transmembrane transporter activity;GO:0003674//molecular_function;GO:0005215//transporter activity;GO:0008028//monocarboxylic acid transmembrane transporter activity;GO:0008509//anion transmembrane transporter activity;GO:0008514//organic anion transmembrane transporter activity;GO:0015075//ion transmembrane transporter activity;GO:0015114//phosphate ion transmem…	GO:0001407//glycerophosphodiester transport;GO:0006810//transport;GO:0006811//ion transport;GO:0006817//phosphate ion transport;GO:0006820//anion transport;GO:0008150//biological_process;GO:0008643//carbohydrate transport;GO:0009405//pathogenesis;GO:0015711//organic anion transport;GO:0015718//monocarboxylic acid transport;GO:0015748//organophosphate ester transport;GO:0015794//glycerol-3-phospha…
ncbi_3641586	15	40	5	4	0.966	2.315	0.322	0.25	1.6405	0.286	-2.52005	0.00361236	0.0368729	--	orf19.929	Protein of unknown function; rat catheter biofilm repressed	XP_716768.2 hypothetical protein CAALFM_C500600CA [Candida albicans SC5314]	-	-	-	-	-	GO:0005515//protein binding	-
ncbi_3638920	23	39	4	5	2.044	3.114	0.355	0.43	2.579	0.3925	-2.71605	0.000947696	0.0144131	PGA12	PGA12	Putative GPI-anchored protein	XP_719359.1 Pga12p [Candida albicans SC5314]	-	-	-	-	GO:0000808//origin recognition complex;GO:0005575//cellular_component;GO:0005623//cell;GO:0005634//nucleus;GO:0005886//plasma membrane;GO:0016020//membrane;GO:0031224//intrinsic component of membrane;GO:0031225//anchored component of membrane;GO:0044425//membrane part;GO:0044464//cell part;GO:0071944//cell periphery	GO:0003674//molecular_function;GO:0003824//catalytic activity;GO:0016853//isomerase activity	GO:0006260//DNA replication;GO:0009236//cobalamin biosynthetic process
ncbi_3637784	806	750	92	131	28.259	23.625	3.223	4.449	25.942	3.836	-2.75762	1.6e-25	8.82e-23	MNN1	MNN1	Putative alpha-1,3-mannosyltransferase; of the mannosyltransferase complex; negatively regulated by Rim101; transcript elevated in chk1 and nik1 mutants, but not in sln1 mutant; Spider and flow model biofilm induced	XP_720587.1 Mnn1p [Candida albicans SC5314]	-	-	-	-	GO:0000139//Golgi membrane;GO:0005575//cellular_component;GO:0005622//intracellular;GO:0005623//cell;GO:0005737//cytoplasm;GO:0005794//Golgi apparatus;GO:0012505//endomembrane system;GO:0016020//membrane;GO:0016021//integral component of membrane;GO:0031090//organelle membrane;GO:0031224//intrinsic component of membrane;GO:0031984//organelle subcompartment;GO:0043226//organelle;GO:0043227//membra…	GO:0003674//molecular_function;GO:0003824//catalytic activity;GO:0005488//binding;GO:0005515//protein binding;GO:0016740//transferase activity;GO:0016757//transferase activity, transferring glycosyl groups	GO:0006457//protein folding;GO:0006464//cellular protein modification process;GO:0006486//protein glycosylation;GO:0006807//nitrogen compound metabolic process;GO:0008150//biological_process;GO:0008152//metabolic process;GO:0009058//biosynthetic process;GO:0009059//macromolecule biosynthetic process;GO:0009100//glycoprotein metabolic process;GO:0009101//glycoprotein biosynthetic process;GO:000939…
ncbi_3647152	561	514	62	87	25.127	20.684	2.775	3.775	22.9055	3.275	-2.80613	2.43e-23	1.2e-20	FET3	FET99	Multicopper oxidase family protein; similar to S. cerevisiae Fet3; does not complement S. cerevisiae fet3 mutant growth under low-iron; iron-repressed; regulated by Tup1, Rim101; flow model biofilm induced; Spider biofilm repressed	XP_711264.1 Fet99p [Candida albicans SC5314]	-	-	-	-	-	GO:0005375//copper ion transmembrane transporter activity;GO:0005507//copper ion binding;GO:0016491//oxidoreductase activity	GO:0006825//copper ion transport;GO:0055114//oxidation-reduction process
ncbi_3638919	44	44	6	6	3.767	3.385	0.513	0.498	3.576	0.5055	-2.82256	4.87e-05	0.00145807	PGA12	orf19.7596	Protein with a phosphoglycerate mutase family domain; Hap43-repressed gene	XP_719358.1 hypothetical protein CAALFM_CR10200WA [Candida albicans SC5314]	-	-	-	-	-	-	-
ncbi_3640150	2857	4126	286	481	102.33	132.791	10.22	16.705	117.561	13.4625	-3.12639	2.28e-30	2.76e-27	isp4	OPT1	Oligopeptide transporter; transports 3-to-5-residue peptides; alleles are distinct, one has intron; suppresses S. cerevisiae ptr2-2 mutant defects; induced by BSA or peptides; Stp3p, Hog1p regulated; flow model biofilm induced	XP_718267.2 oligopeptide transporter [Candida albicans SC5314]	-	-	-	-	GO:0005575//cellular_component;GO:0005622//intracellular;GO:0005623//cell;GO:0005737//cytoplasm;GO:0005783//endoplasmic reticulum;GO:0005789//endoplasmic reticulum membrane;GO:0005794//Golgi apparatus;GO:0005886//plasma membrane;GO:0005887//integral component of plasma membrane;GO:0012505//endomembrane system;GO:0016020//membrane;GO:0016021//integral component of membrane;GO:0031224//intrinsic co…	GO:0003674//molecular_function;GO:0005215//transporter activity;GO:0015198//oligopeptide transporter activity;GO:0022857//transmembrane transporter activity;GO:0035673//oligopeptide transmembrane transporter activity;GO:0042887//amide transmembrane transporter activity;GO:1901584//tetrapeptide transmembrane transporter activity;GO:1904680//peptide transmembrane transporter activity	GO:0006810//transport;GO:0006857//oligopeptide transport;GO:0008104//protein localization;GO:0008150//biological_process;GO:0015031//protein transport;GO:0015833//peptide transport;GO:0033036//macromolecule localization;GO:0035672//oligopeptide transmembrane transport;GO:0042886//amide transport;GO:0045184//establishment of protein localization;GO:0051179//localization;GO:0051234//establishment o…
ncbi_3644483	102	16	5	8	8.841	1.246	0.433	0.672	5.0435	0.5525	-3.19038	8.36e-05	0.00224802	PHO2	PHO100	Putative inducible acid phosphatase; DTT-extractable and observed in culture supernatant in low-phosphate conditions; slight effect on murine virulence; virulence-group-correlated expression; N-glycosylated; F-12/CO2 early biofilm induced	XP_713870.1 Pho100p [Candida albicans SC5314]	Metabolism;Metabolism;Metabolism;Metabolism;Metabolism	Global and overview maps;Global and overview maps;Nucleotide metabolism;Nucleotide metabolism;Metabolism of cofactors and vitamins	ko01100//Metabolic pathways;ko01110//Biosynthesis of secondary metabolites;ko00230//Purine metabolism;ko00240//Pyrimidine metabolism;ko00760//Nicotinate and nicotinamide metabolism	K03787;K03787;K03787;K03787;K03787	-	GO:0008253//5'-nucleotidase activity;GO:0008254//3'-nucleotidase activity;GO:0016787//hydrolase activity	GO:0006950//response to stress
ncbi_3648090	67	59	3	9	4.612	3.649	0.206	0.6	4.1305	0.403	-3.35746	4.93e-07	3.18e-05	OXR1	CPD2	Protein with homology to NADH dehydrogenase; regulated by Sef1p-, Sfu1p-, and Hap43p	XP_710306.1 hypothetical protein CAALFM_C403340CA [Candida albicans SC5314]	-	-	-	-	-	GO:0004148//dihydrolipoyl dehydrogenase activity;GO:0004362//glutathione-disulfide reductase activity;GO:0004791//thioredoxin-disulfide reductase activity;GO:0015042//trypanothione-disulfide reductase activity;GO:0016152//mercury (II) reductase activity;GO:0016491//oxidoreductase activity;GO:0050451//CoA-disulfide reductase activity;GO:0050627//mycothione reductase activity;GO:0070402//NADPH bind…	GO:0006096//glycolytic process;GO:0010126//mycothiol metabolic process;GO:0045454//cell redox homeostasis;GO:0046689//response to mercury ion;GO:0051068//dihydrolipoamide metabolic process;GO:0055114//oxidation-reduction process
ncbi_3634945	266	132	15	20	20.41	9.1	1.15	1.486	14.755	1.318	-3.48478	2.12e-14	3.67e-12	AOX2	AOX2	Alternative oxidase; cyanide-resistant respiration; induced by antimycin A, oxidants; growth; Hap43, chlamydospore formation repressed; rat catheter, Spider biofilm induced; regulated in Spider biofilms by Bcr1, Tec1, Ndt80, Brg1	XP_723459.2 Aox2p [Candida albicans SC5314]	-	-	-	-	-	GO:0009916//alternative oxidase activity	GO:0055114//oxidation-reduction process
ncbi_3645372	32199	42689	1982	4345	1424.02	1696.21	87.583	186.134	1560.12	136.858	-3.5109	3.76e-08	3.16e-06	HWP1	HWP1	Hyphal cell wall protein; host transglutaminase substrate; opaque-, a-specific, alpha-factor induced; at MTLa side of conjugation tube; virulence complicated by URA3 effects; Bcr1-repressed in RPMI a/a biofilms; Spider biofilm induced	KGR09438.1 hyphal wall protein 1 [Candida albicans P78048]	-	-	-	-	-	-	-
ncbi_3646814	2149	2718	84	226	221.878	252.126	8.666	22.602	237.002	15.634	-3.92214	1.17e-07	8.93e-06	ECE1	ECE1	Candidalysin, cytolytic peptide toxin essential for mucosal infection; assembles into polymers that form pores in epithelial cells; hypha-specific protein;	KGU26192.1 cell elongation protein 1 [Candida albicans P34048]	-	-	-	-	GO:0005925//focal adhesion	GO:0004713//protein tyrosine kinase activity	GO:0006468//protein phosphorylation;GO:0007172//signal complex assembly
ncbi_3641811	1013	1176	29	72	38.496	40.151	1.101	2.65	39.3235	1.8755	-4.39004	8.74e-42	1.32e-38	CFL1	CFL2	Oxidoreductase; iron utilization; Sfu1/Sef1/Hap43/Nrg1/Tup1/Rim101 regulated; alkaline/low iron/fluphenazine/ciclopirox olamine, flucytosine, fluconazole, Spider/flow model/rat catheter biofilm induced; caspofungin/amphotericin B repressed	KGQ88252.1 hypothetical protein MEU_03809 [Candida albicans P37005]	-	-	-	-	-	GO:0016491//oxidoreductase activity;GO:0016655//oxidoreductase activity, acting on NAD(P)H, quinone or similar compound as acceptor	GO:0006814//sodium ion transport;GO:0055114//oxidation-reduction process
ncbi_3642639	84	100	5	3	3.318	3.549	0.197	0.115	3.4335	0.156	-4.46006	1.75e-11	2.35e-09	CFL1	CFL4	C-terminus similar to ferric reductases; induced in low iron; Sfu1-repressed; ciclopirox olamine induced; colony morphology-related gene regulation by Ssn6; Hap43-repressed; Sef1-regulated	XP_715695.2 ferric/cupric-chelate reductase [Candida albicans SC5314]	-	-	-	-	-	GO:0016491//oxidoreductase activity;GO:0016655//oxidoreductase activity, acting on NAD(P)H, quinone or similar compound as acceptor	GO:0006814//sodium ion transport;GO:0055114//oxidation-reduction process
ncbi_3639173	10	8	0	0	1.885	1.355	0	0	1.62	0.001	-10.6618	0.00454898	0.0433238	--	ASG7	a-cell specific protein of unknown function; two predicted transmembrane domains; member of conserved Mcm1 regulon; induced by alpha pheromone in SpiderM medium	XP_719085.1 Asg7p [Candida albicans SC5314]	-	-	-	-	-	-	-
